# Supplementary material for: Reaction Mechanism and Role of Chlorine in Ethylene Epoxidation Revealed by in situ XPS
Source: Research Square preprint supplement (doi:10.21203/rs.3.rs-7141633/v1), 2025-08-12
Supplement: Supplementary file 1 [file fddc51a4cc15743df1d7576d.docx]

***Supplementary Information***

**Reaction Mechanism and Role of Chlorine in Ethylene Epoxidation revealed by in situ XPS**

*Man Guo1,2,#, Nanchen Dongfang3,#, Frank Krumeich4, Marcella Iannuzzi3, Jeroen A. van Bokhoven1,2, Luca Artiglia1,**

1 PSI Center for Energy and Environmental Science, Paul Scherrer Institute, 5232 Villigen, Switzerland.

2 Institute for Chemical and Bioengineering, Department of Chemistry and Applied Biosciences, ETH Zurich, 8093 Zurich, Switzerland.

3 Department of Chemistry, University of Zurich, 8057 Zurich, Switzerland.

4 Laboratory of Inorganic Chemistry, Department of Chemistry and Applied Biosciences, ETH Zurich, 8093 Zurich, Switzerland.

# Contributed equally to the writing of the manuscript.


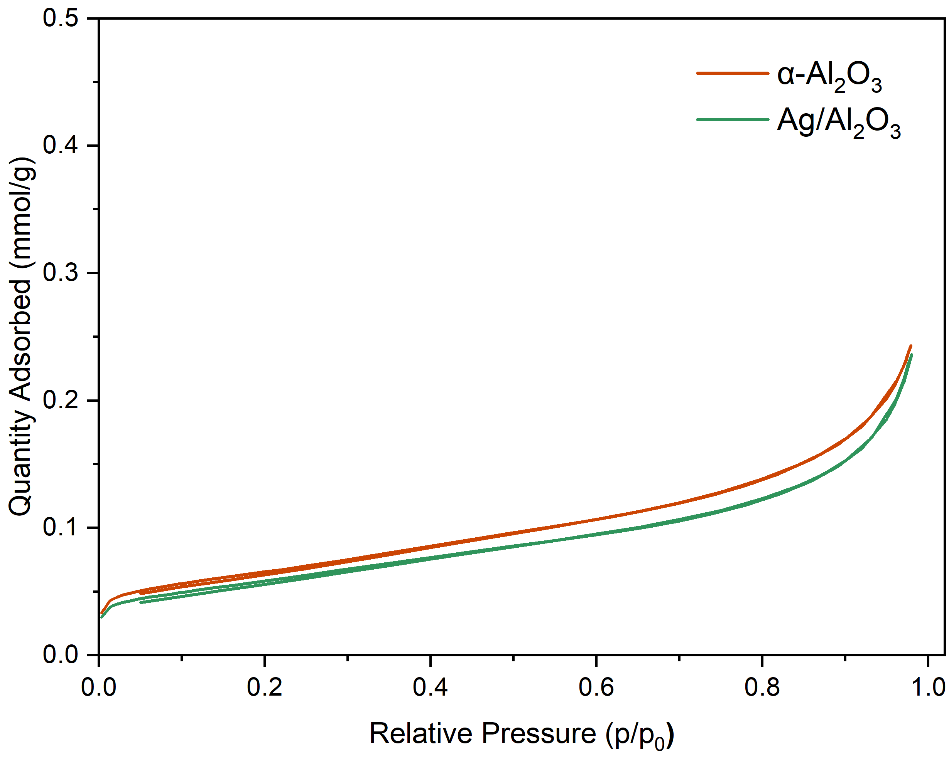


**Supplementary Figure 1.** Adsorption-desorption isotherms of N2 at 77 K for α-Al2O3 and Ag/Al2O3.

**Supplementary Table 1.** Brunauer-Emmett-Teller (BET) surface areas of the α-Al2O3 support and Ag/Al2O3 catalyst.

| Sample | α-Al2O3 | Ag/Al2O3 |
| --- | --- | --- |
| Surface area (m2/g) | 5.2 | 4.6 |


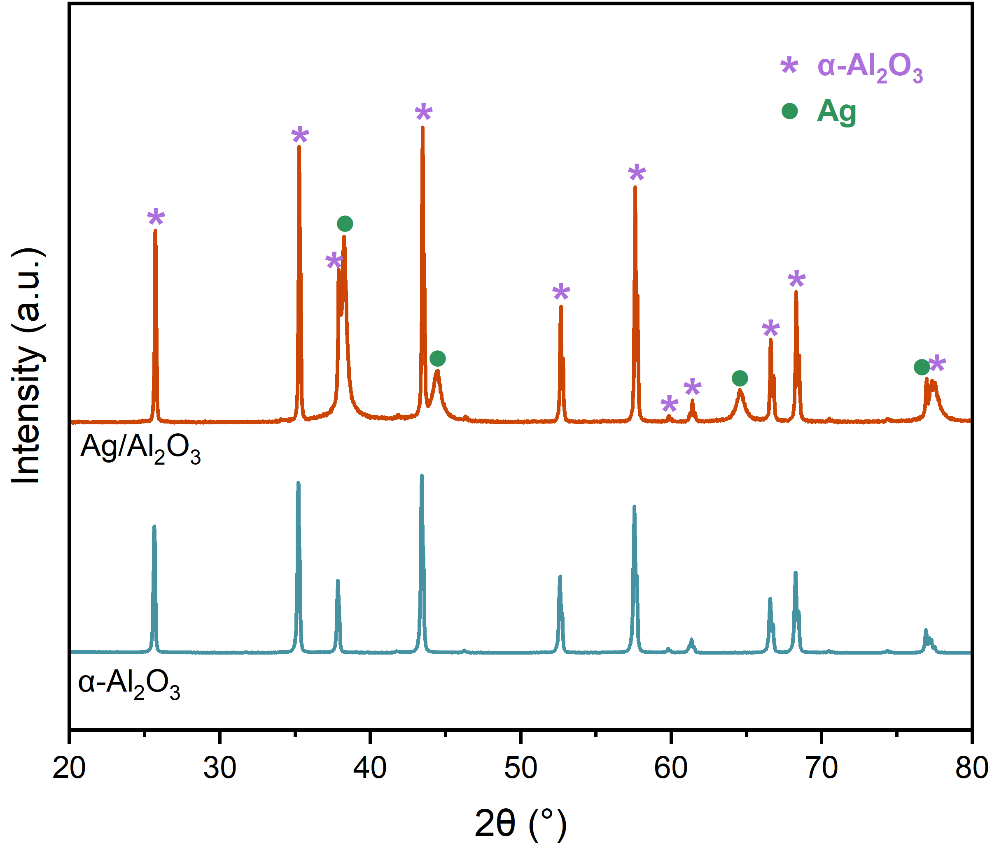


**Supplementary Figure 2.** XRD patterns of Ag/Al2O3 catalyst and α-Al2O3.


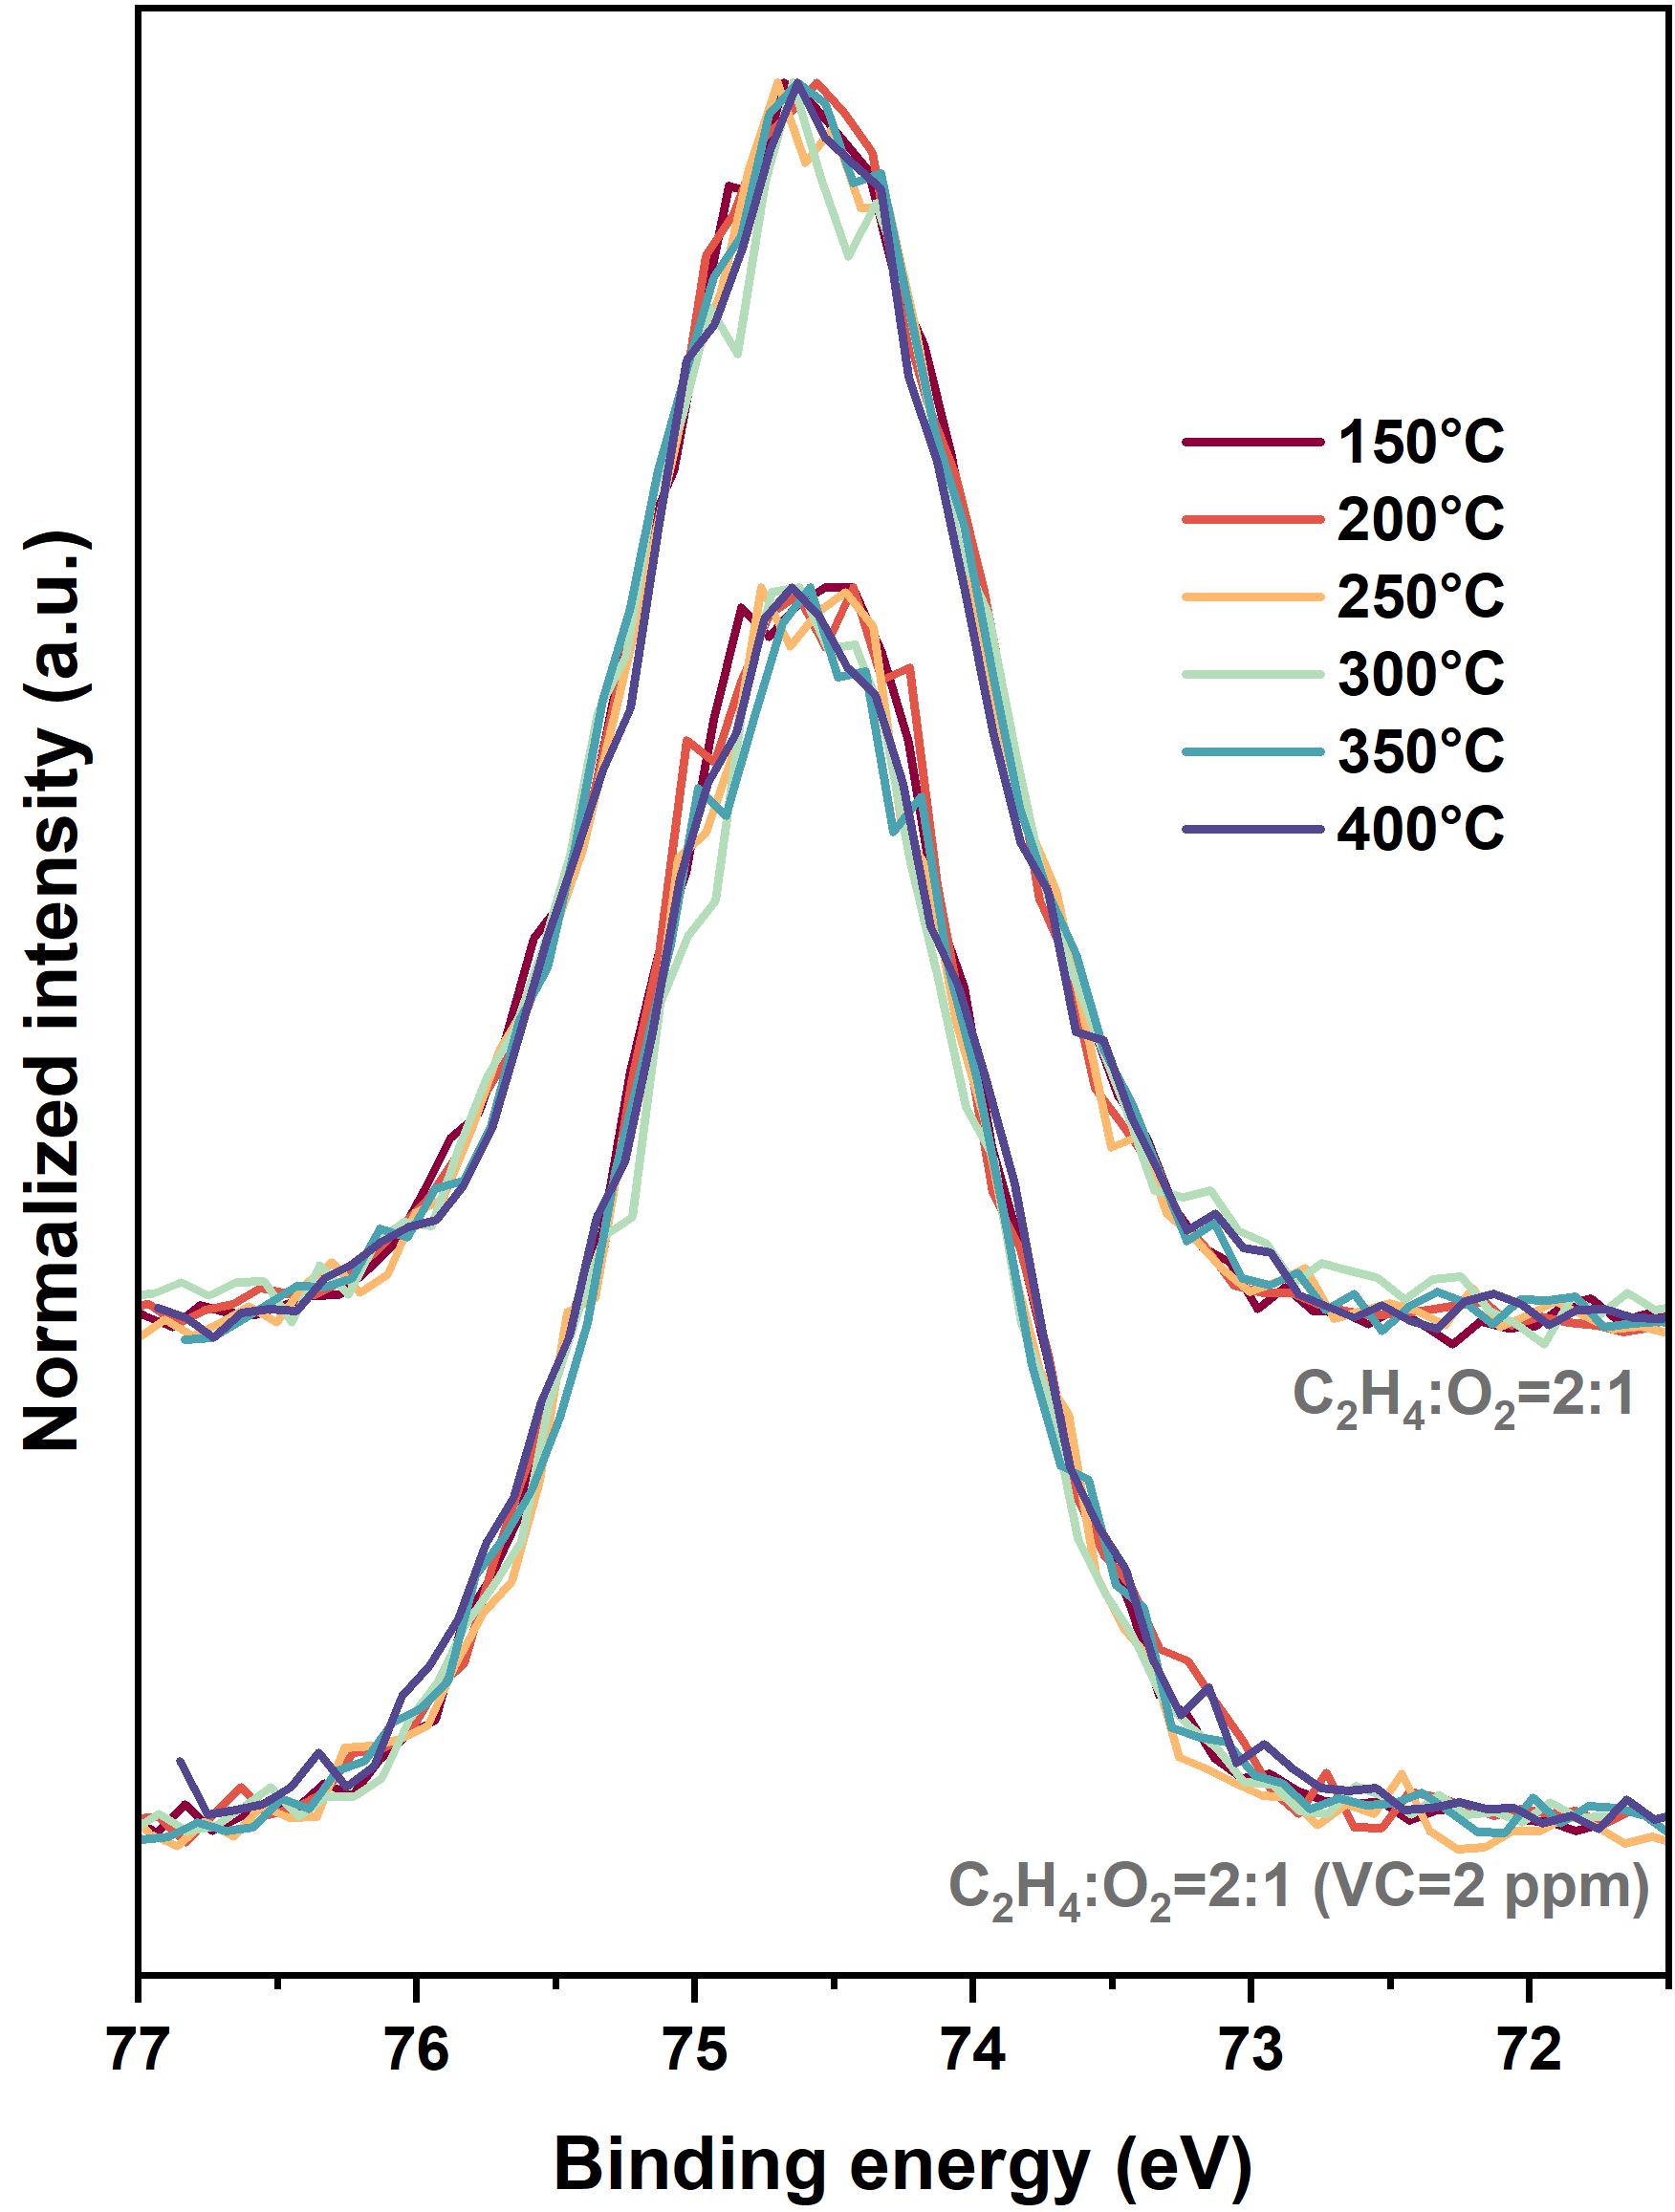


**Supplementary Figure 3.** Al 2p spectra (normalized by intensity) of Ag/Al2O3, collected at different temperatures during exposure to a C2H4:O2 (2:1) gas mixture (1 mbar), either in the absence or presence of 2 ppm vinyl chloride (KE=300 eV).


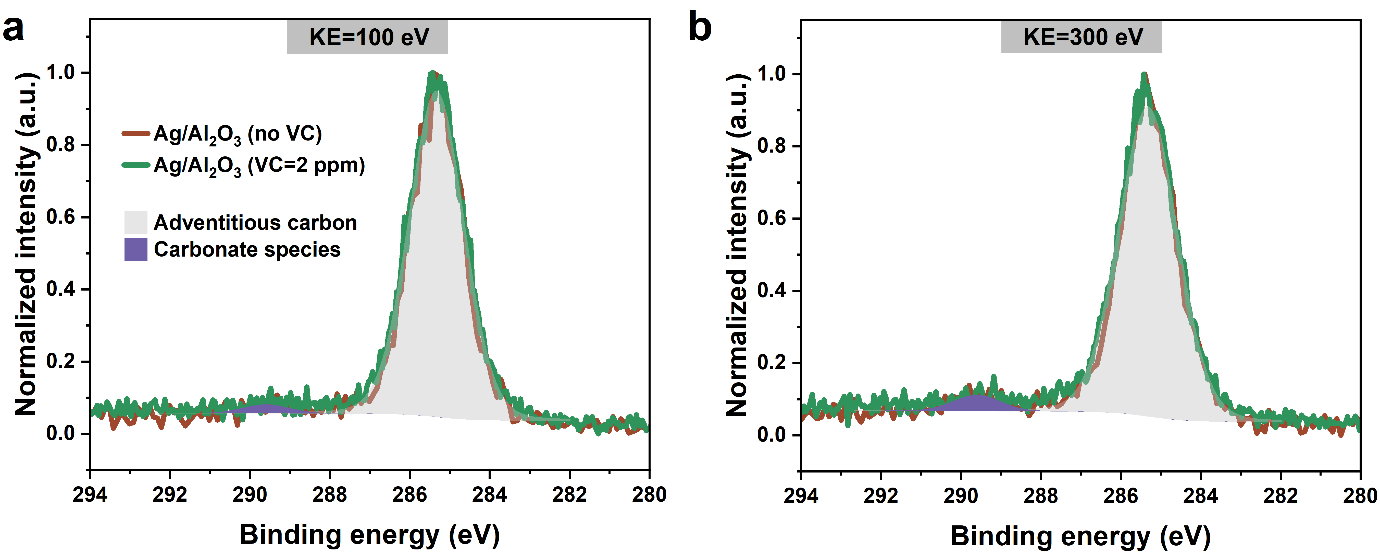


**Supplementary Figure 4.** C 1s spectra (adventitious carbon contamination on “as introduced” Ag/Al2O3 samples) collected under HV conditions at room temperature prior to gas exposure, measured at kinetic energies of **a,** 100 eV and **b,** 300 eV. The brown and green curves correspond to the samples subsequently exposed in the absence and presence of 2 ppm vinyl chloride, respectively. The fitting parameters of adventitious carbon and carbonate species are listed in Supplementary Table. 2.

**Supplementary Table 2.** Fitting parameters of C 1s peaks in Supplementary Fig. 4

| Species | KE (eV) | BE (eV) | FWHM (eV) | %L-G |
| --- | --- | --- | --- | --- |
| Adventitious carbon | 100 | 285.3 | 1.6 | 10% |
| 300 | 285.3 | 1.8 | 10% |
| Carbonate species | 100 | 289.6 | 1.4 | 10% |
| 300 | 289.6 | 1.4 | 10% |


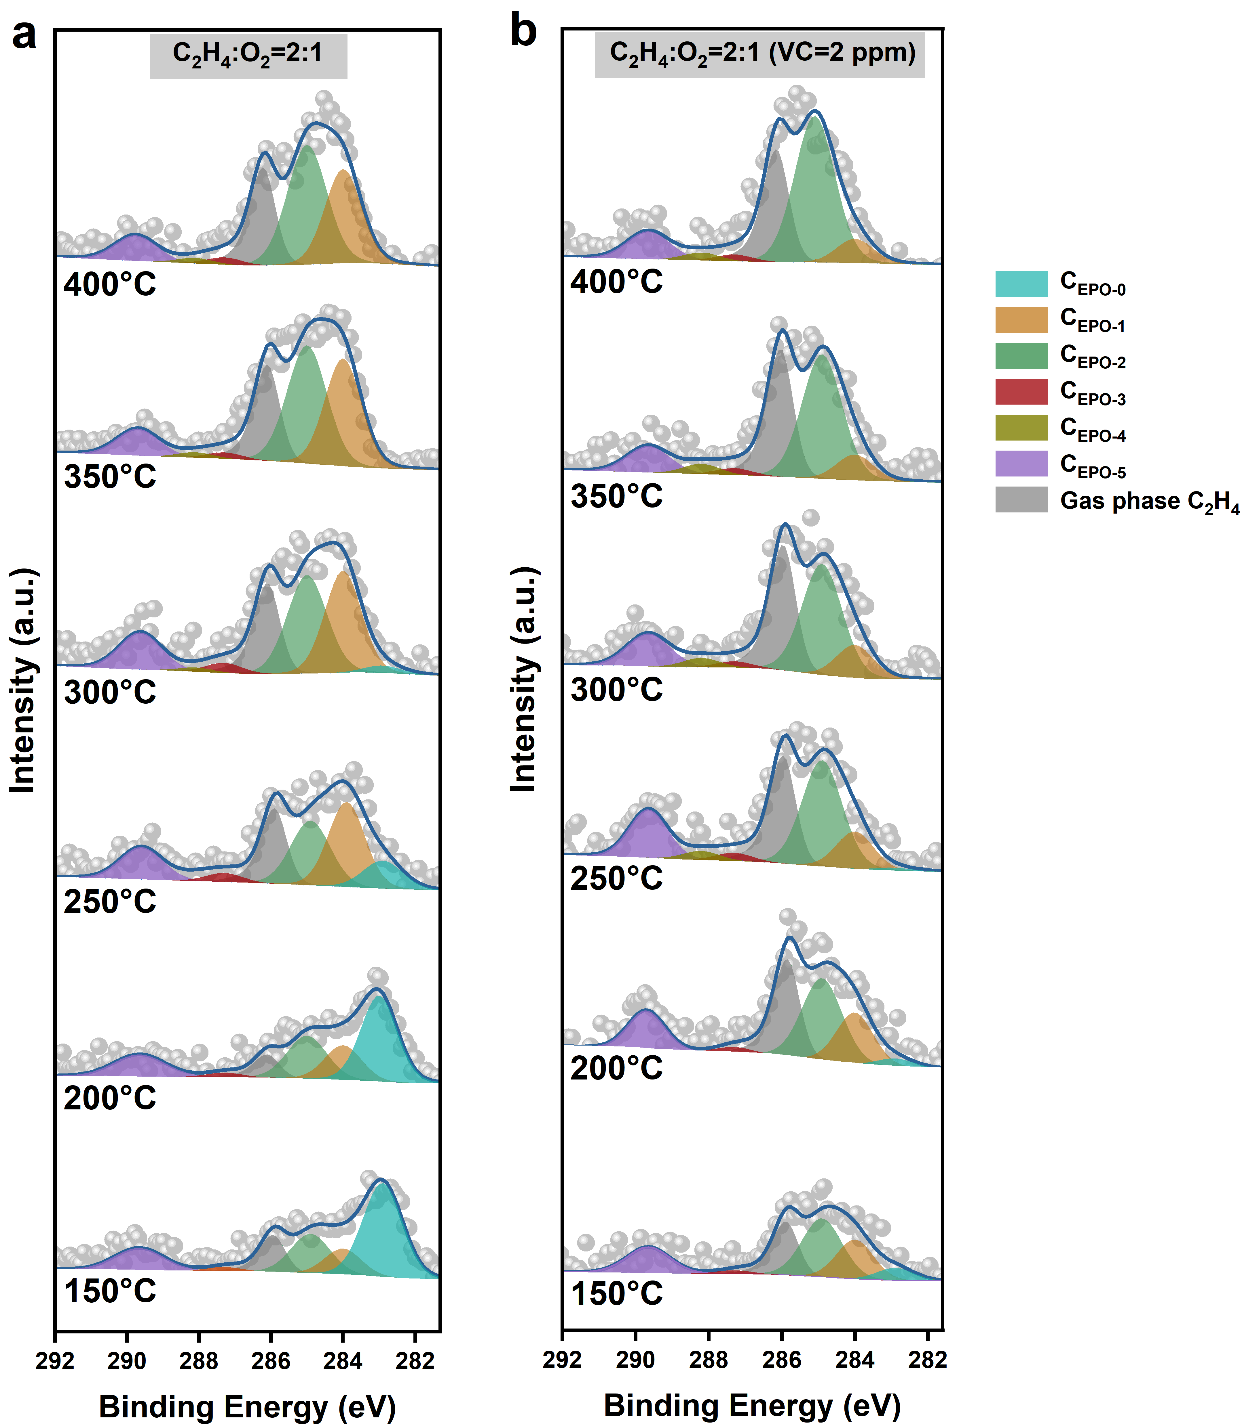


**Supplementary Figure 5.** C 1s peaks evolution of Ag/Al2O3 acquired at a kinetic energy of 100 eV while exposing the sample to a C2H4:O2 (2:1) mixture at 1 mbar **a,** in the absence and **b,** in the presence of 2 ppm VC over a temperature range of 150 °C to 400 °C. The fitting parameters are listed in Supplementary Table 3.

**Supplementary Table 3. Fitting parameters of C 1s peaks (KE=100 eV).**

|  | BE (eV) | FWHM (eV) | %L-G | Assignment |
| --- | --- | --- | --- | --- |
| CEPO-0 | 282.9 | 1.2 | 10% | CHy (y=1-2) |
| CEPO-1 | 284.0 | 1.2 | 10% | C2Hx (x=1-3) |
| CEPO-2 | 285.0 | 1.3 | 10% | Adventitious carbon,  long-chain carbonaceous species, weakly adsorbed ethylene |
| CEPO-3 | 287.3 | 1.2 | 10% | Adsorbed CO |
| CEPO-4 | 288.1 | 1.2 | 10% | Adsorbed EO |
| CEPO-5 | 289.6 | 1.4 | 10% | Carbonate |
| Gas phase C2H4 | ~286.0 | 0.8 | 10% | —— |

**
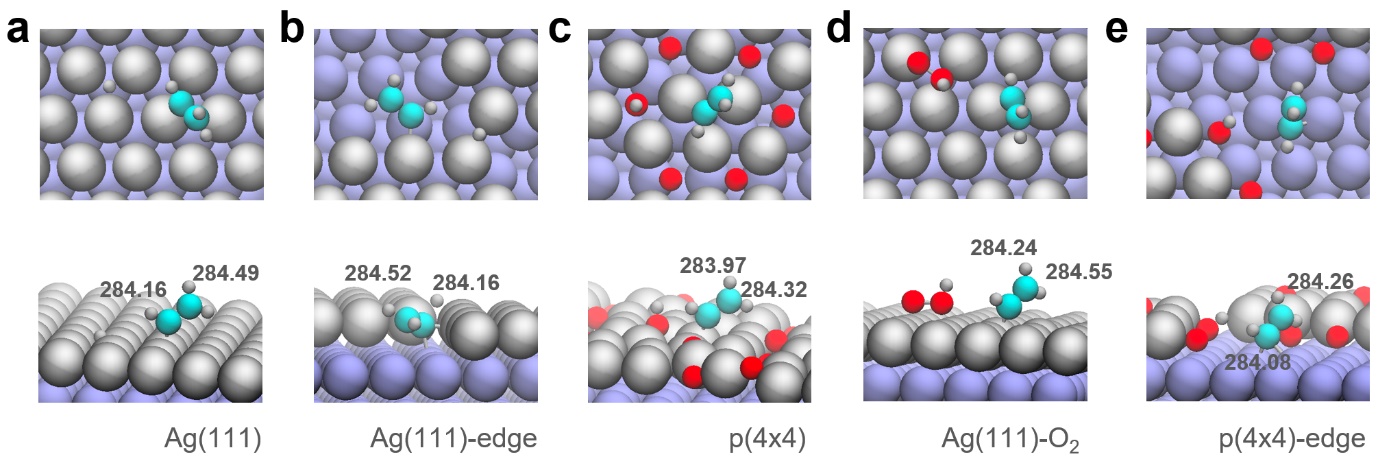
**

**Supplementary Figure 6.** Optimized structure and calculated BE of C2H3 species on various silver surfaces.


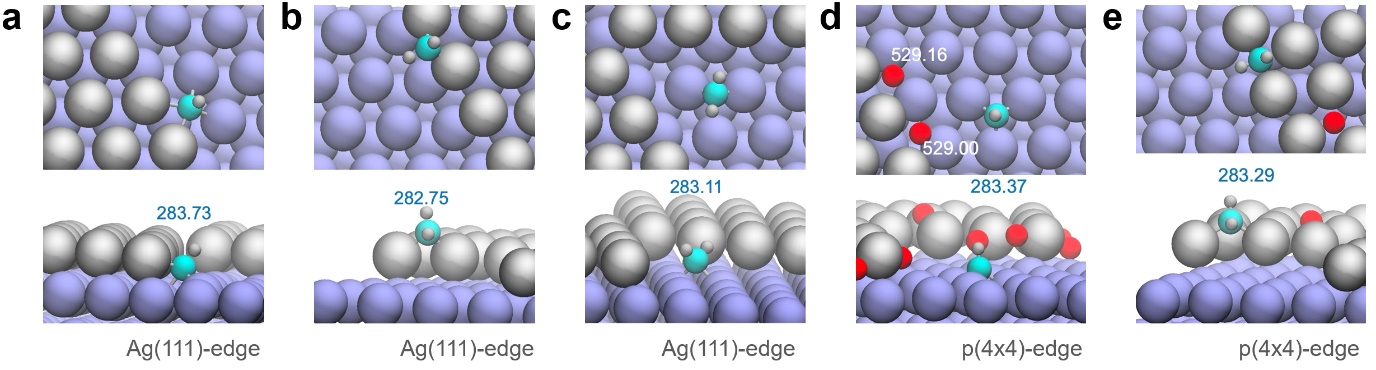


**Supplementary Figure 7.** Optimized structure and calculated BE of CHy (y=1-2) species on various defective silver surfaces.


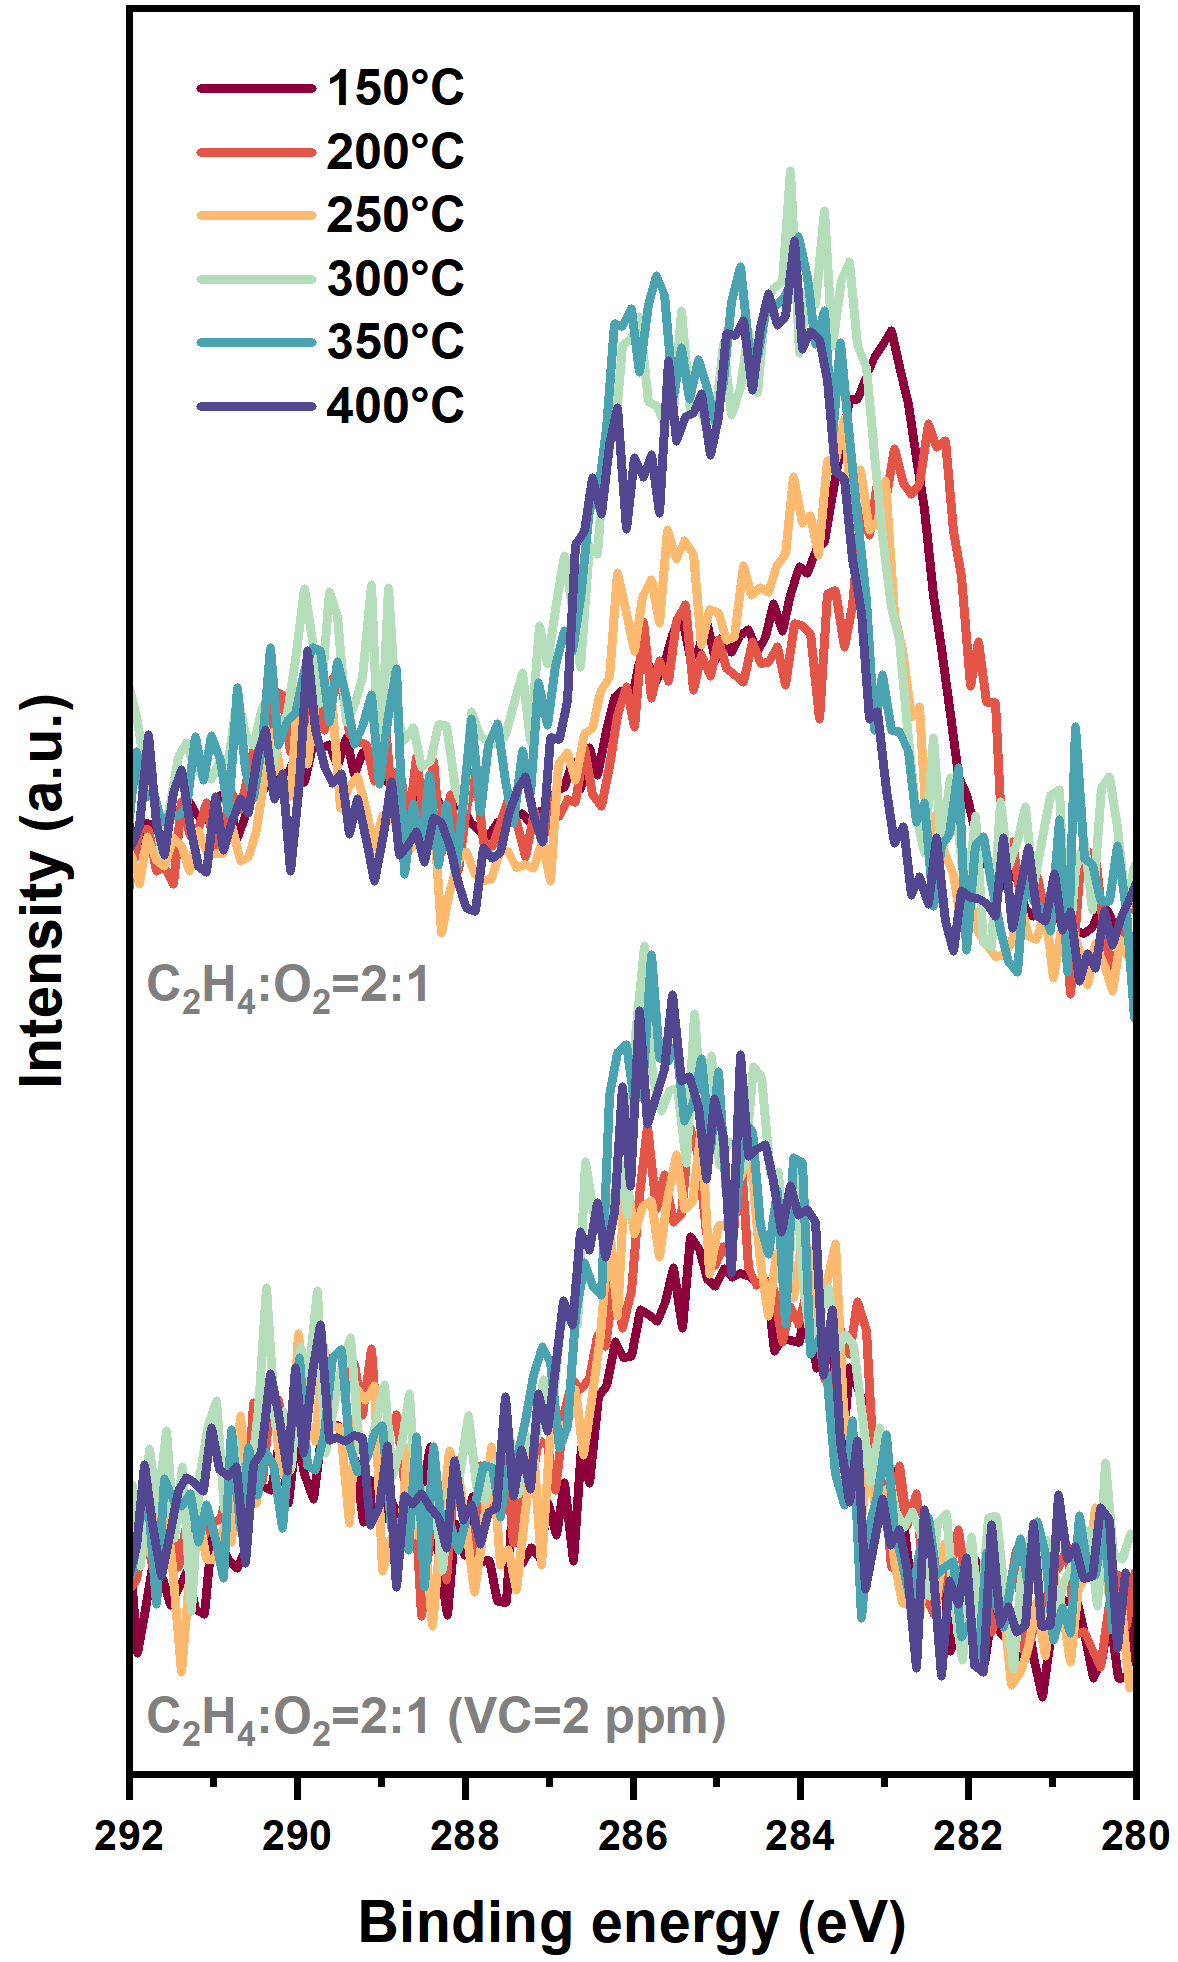


**Supplementary Figure 8.** C 1s spectra of Ag/Al2O3 collected at different temperatures during exposure to a C2H4:O2 (2:1) gas mixture (1 mbar), either in the absence or presence of 2 ppm vinyl chloride (KE=300 eV).


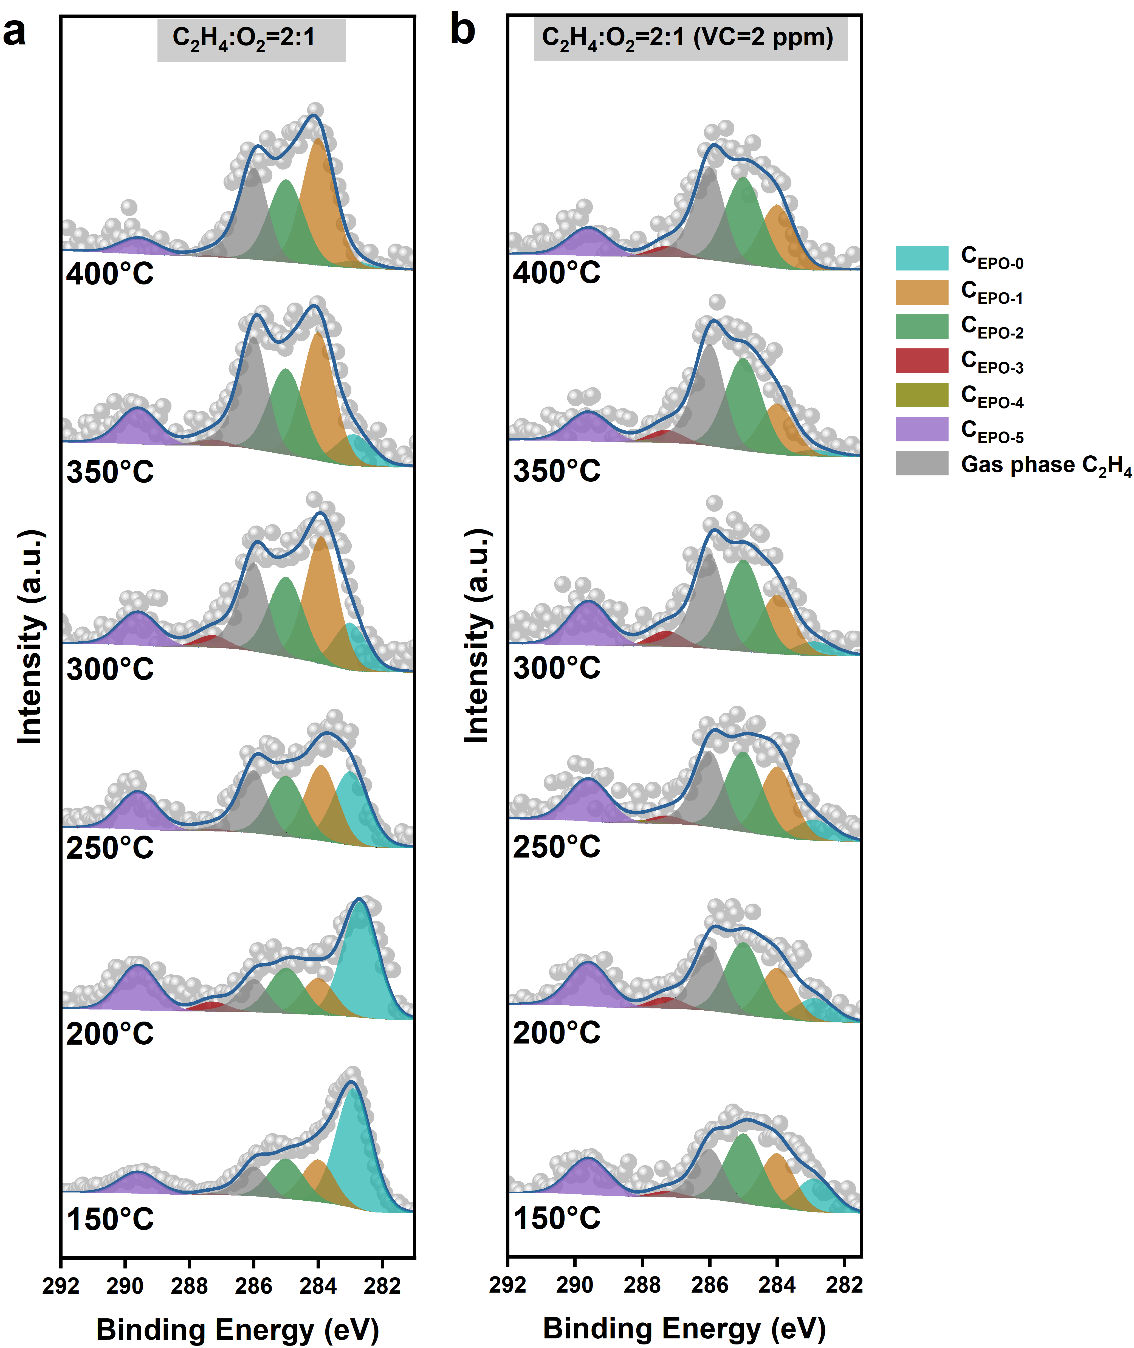


**Supplementary Figure 9.** C 1s peaks evolution of Ag/Al2O3 acquired at a kinetic energy of 300 eV while exposing the sample to a C2H4:O2 (2:1) mixture at 1 mbar **a,** in the absence and **b,** in the presence of 2 ppm vinyl chloride over a temperature range of 150 °C to 400 °C. The fitting parameters are listed in Supplementary Table 4.

**Supplementary Table 4.** Fitting parameters of C 1s peaks (KE=300 eV).

|  | BE (eV) | FWHM (eV) | %L-G | Assignment |
| --- | --- | --- | --- | --- |
| CEPO-0 | 282.9 | 1.3 | 10% | CHy (y=1-2) |
| CEPO-1 | 284.0 | 1.2 | 10% | C2Hx (x=1-3) |
| CEPO-2 | 285.0 | 1.3 | 10% | Adventitious carbon,  long-chain carbonaceous species,  weakly adsorbed ethylene |
| CEPO-3 | 287.3 | 1.2 | 10% | Adsorbed CO |
| CEPO-4 | 288.1 | 1.2 | 10% | Adsorbed EO |
| CEPO-5 | 289.6 | 1.4 | 10% | Carbonate |
| Gas phase C2H4 | ~286.0 | 1.0 | 10% | —— |


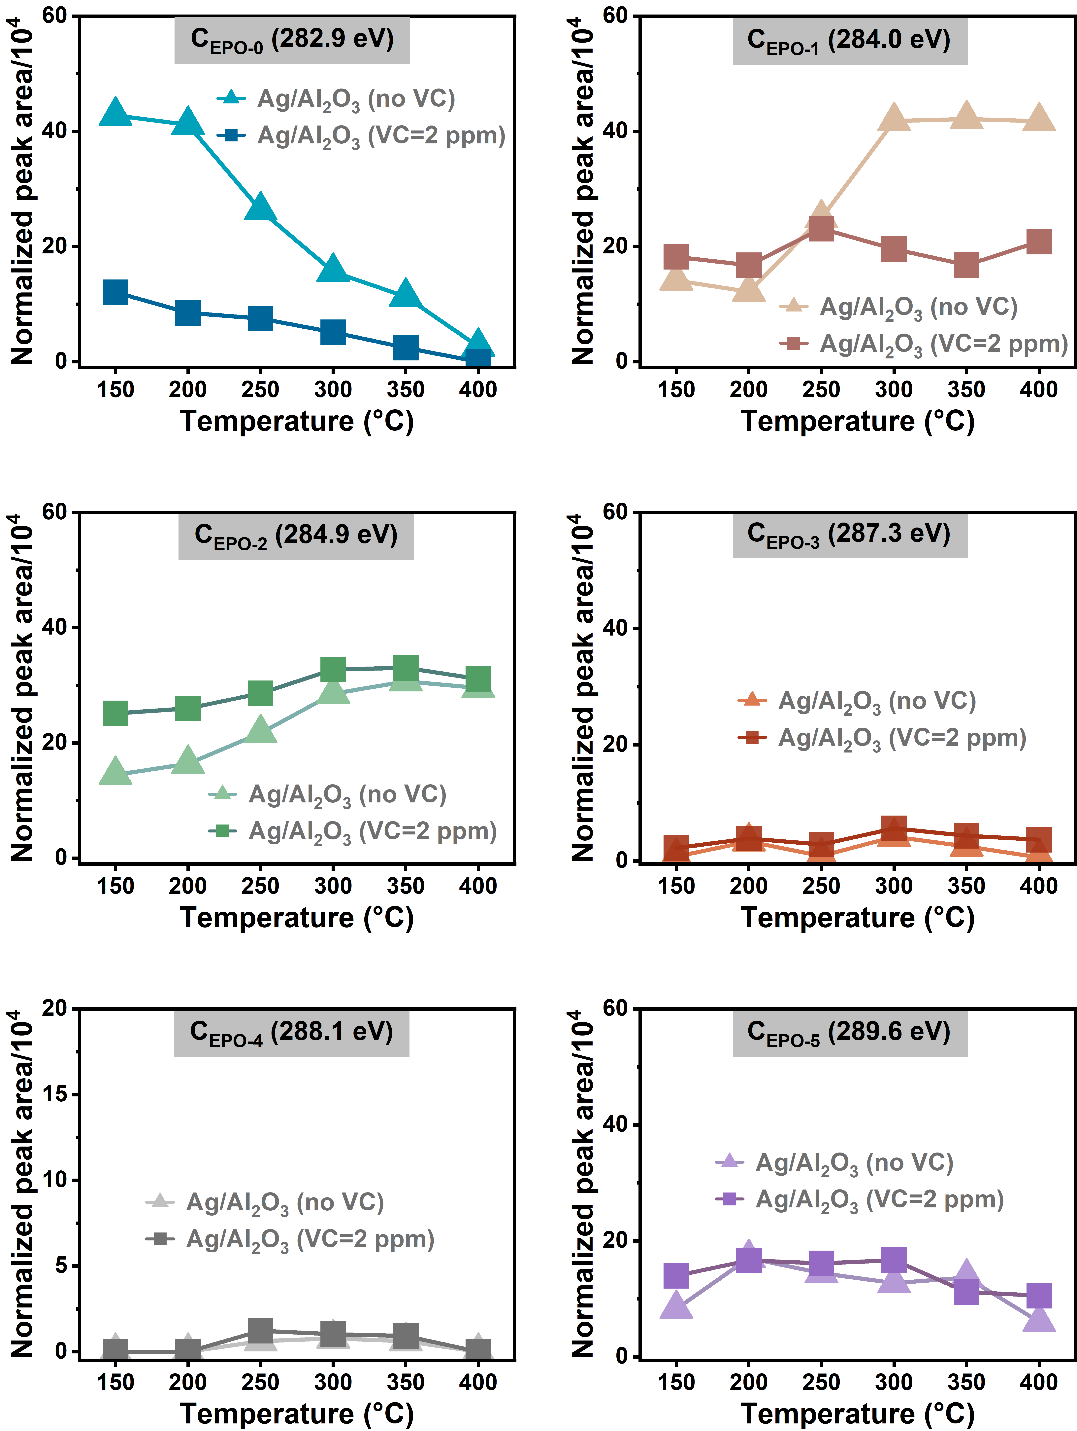


**Supplementary Figure 10.** Normalized peak area of different C-related reaction intermediates on Ag/Ag2O3 as a function of temperature under in situ EPO conditions. (C2H4:O2=2:1, 1 mbar, KE = 300 eV).


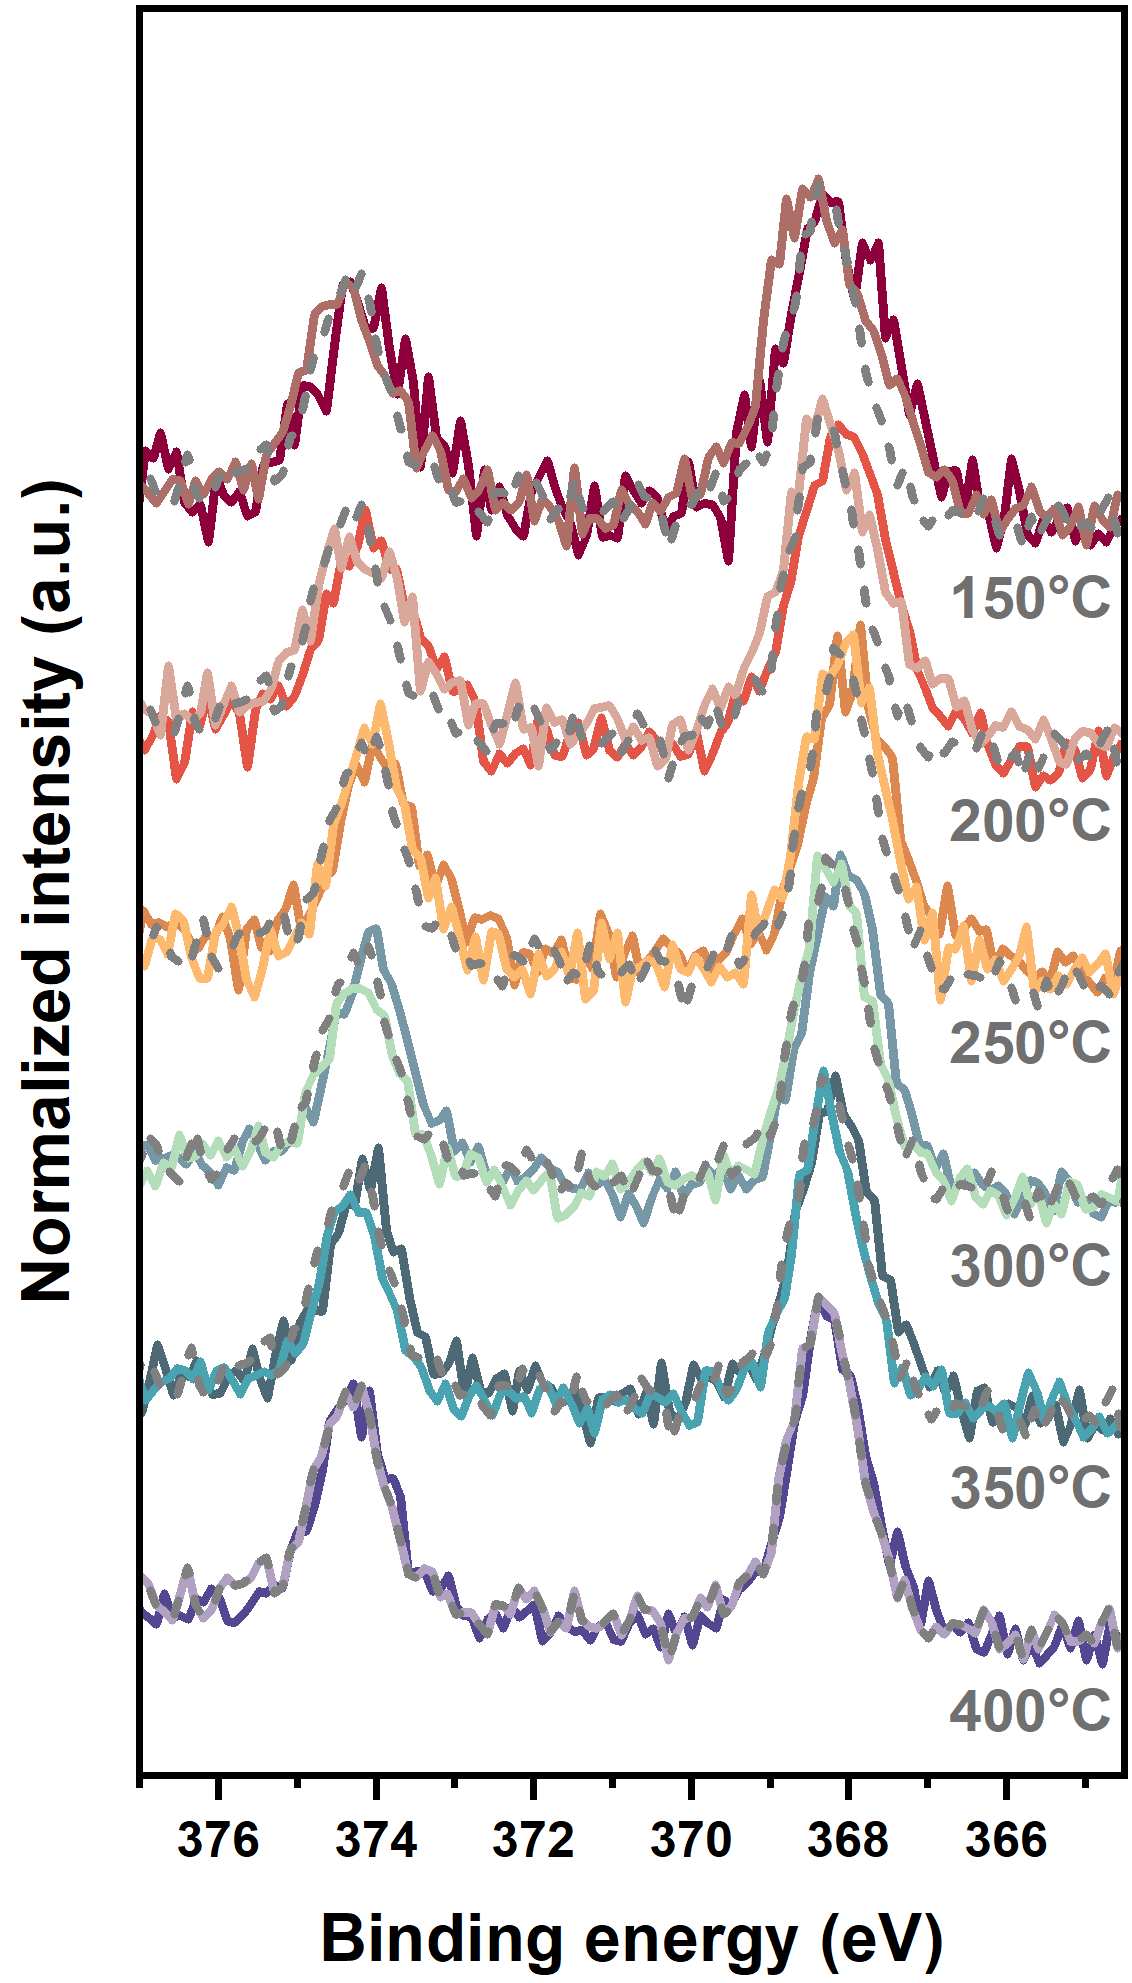


**Supplementary Figure 11.** Ag 3d spectra (normalized by intensity) of Ag/Al2O3 collected at different temperatures during exposure to a C2H4:O2 (2:1) gas mixture (1 mbar), in the absence (lighter curves) and presence (darker curves) of 2 ppm vinyl chloride (KE=300 eV). The dashed lines represent reference spectra acquired at 400 ºC without VC.


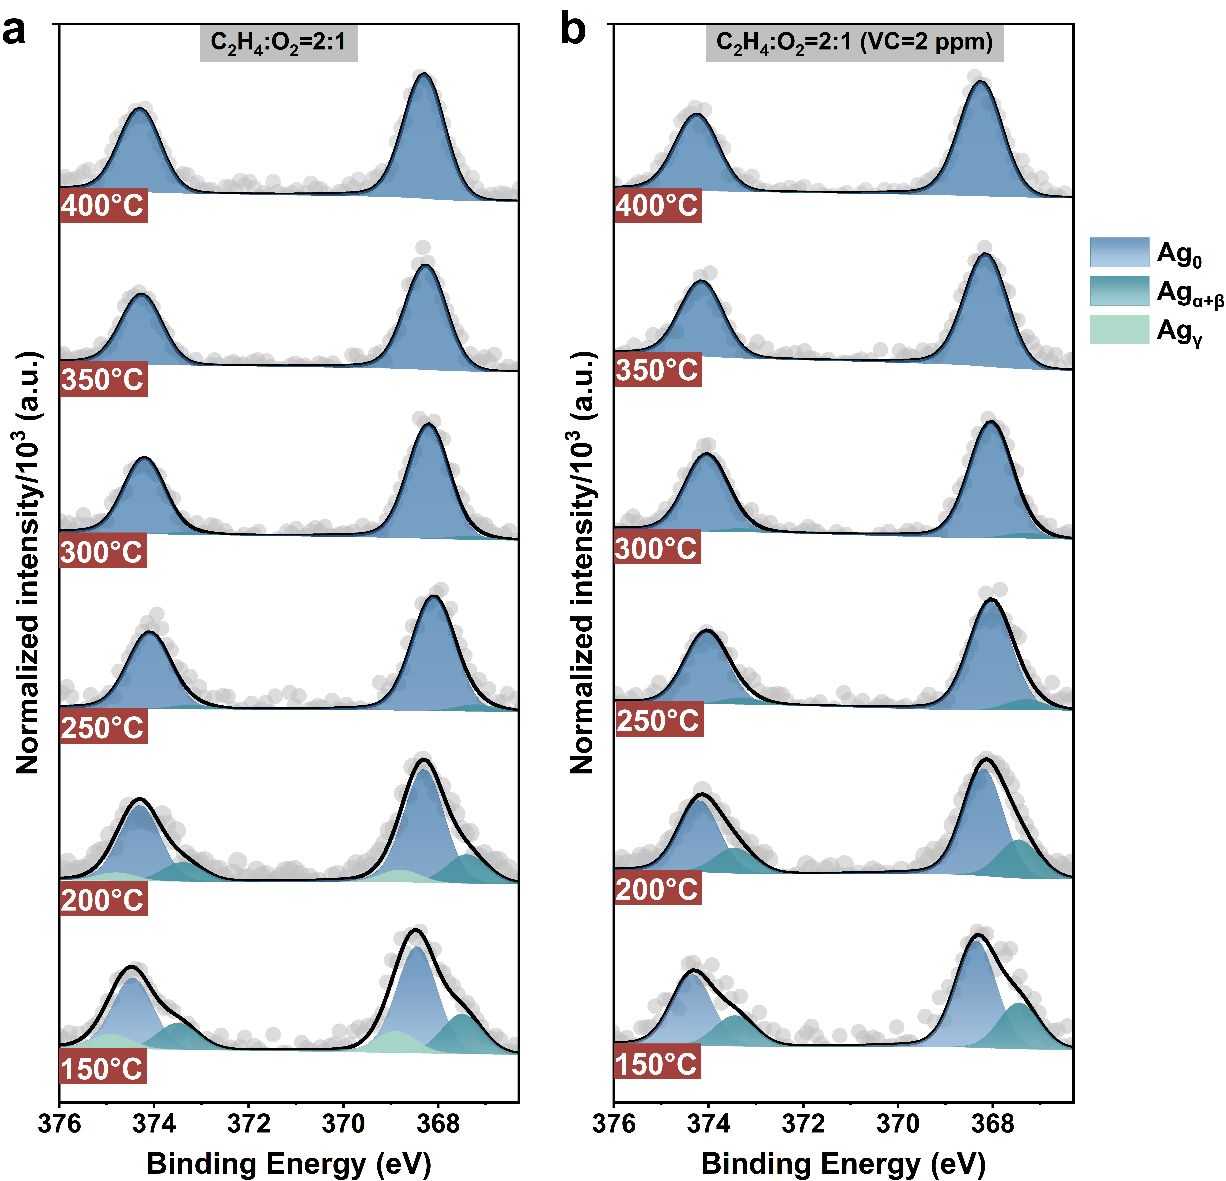


**Supplementary Figure 12.** Ag 3d peaks evolution of Ag/Al2O3 acquired at a kinetic energy of 300 eV while exposing the sample to a C2H4:O2 (2:1) mixture at 1 mbar **a,** in the absence and **b,** in the presence of 2 ppm vinyl chloride over a temperature range of 150 °C to 400 °C. The fitting parameters are listed in Supplementary Table 5.

**Supplementary Table 5. Fitting parameters of Ag 3d peaks (KE=300 eV).**

|  | BE (eV) | FWHM (eV) | %L-G | Assignment |
| --- | --- | --- | --- | --- |
| Ag0 | 368.3 | 1.0 | 9% | Metallic Ag |
| Agα+β | 367.4 | 1.0 | 9% | Surface silver oxide |
| Agγ | 368.9 | 1.0 | 9% | Ag species coordinated to CHy |


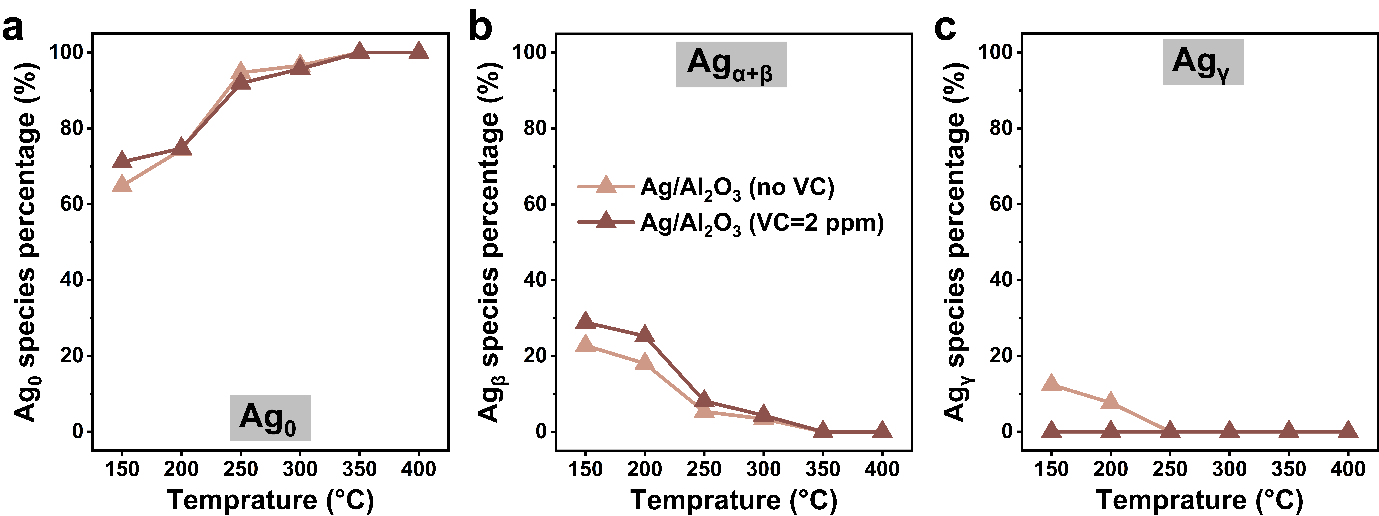


**Supplementary Figure 13.** Fractions of different Ag species on Ag/Ag2O3 as a function of temperature under in situ EPO conditions. (C2H4:O2=2:1, 1 mbar, KE = 300 eV).


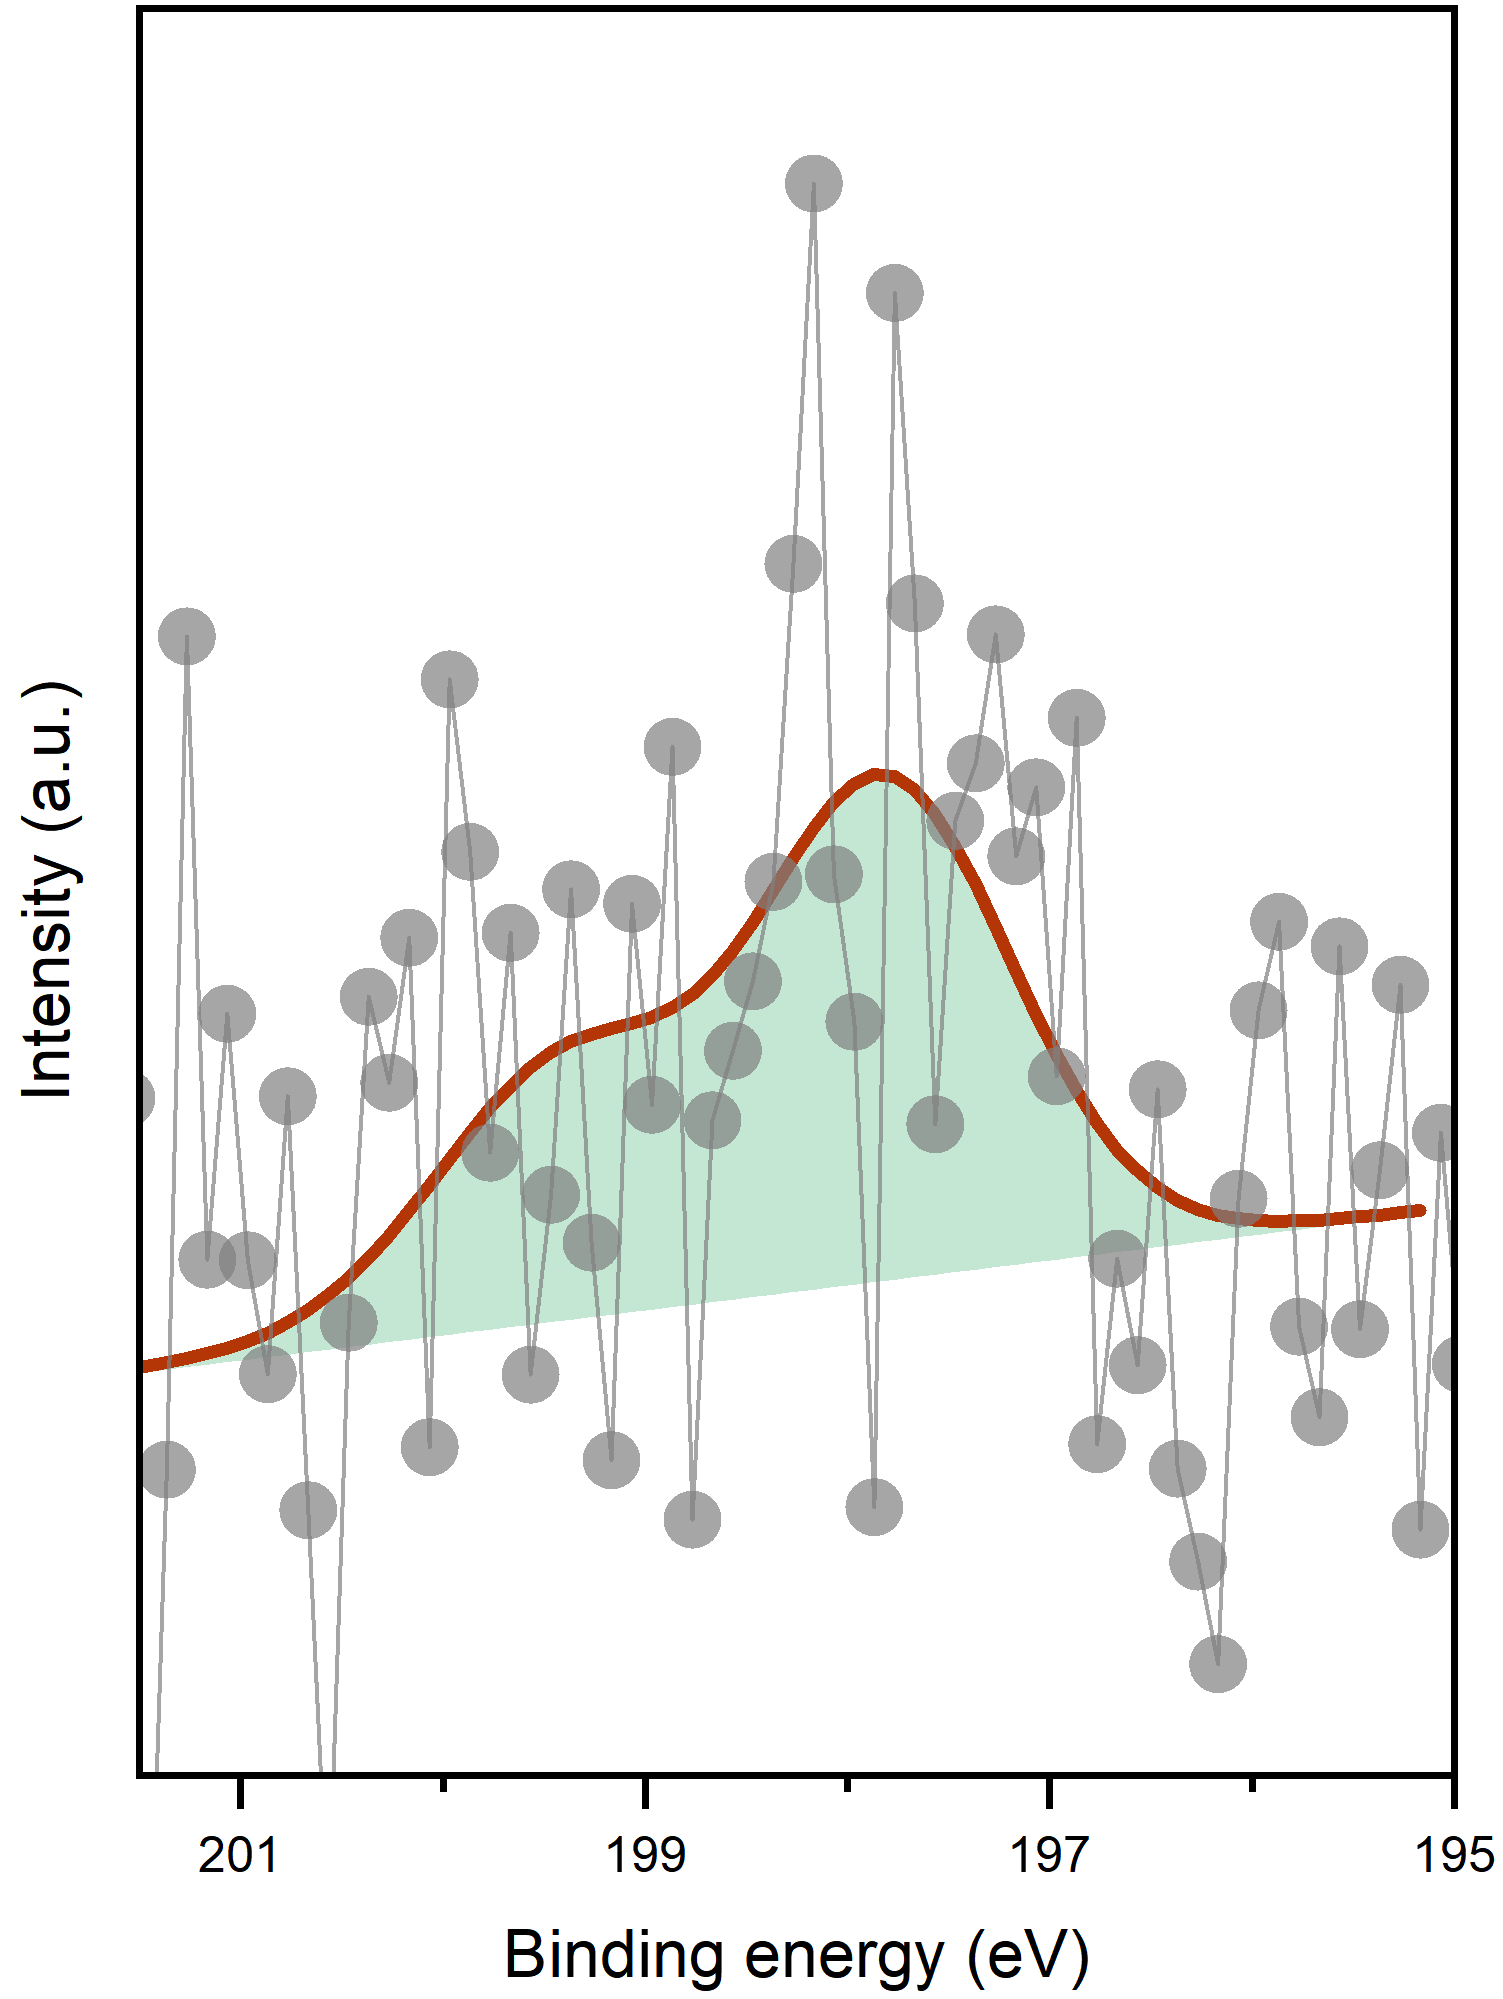


**Supplementary Figure 14.** Cl 2p spectra of Ag/Al2O3 acquired at a kinetic energy of 300 eV while exposing the sample to C2H4:O2=2:1, cofeeding 2 ppm vinyl chloride at 1 mbar.


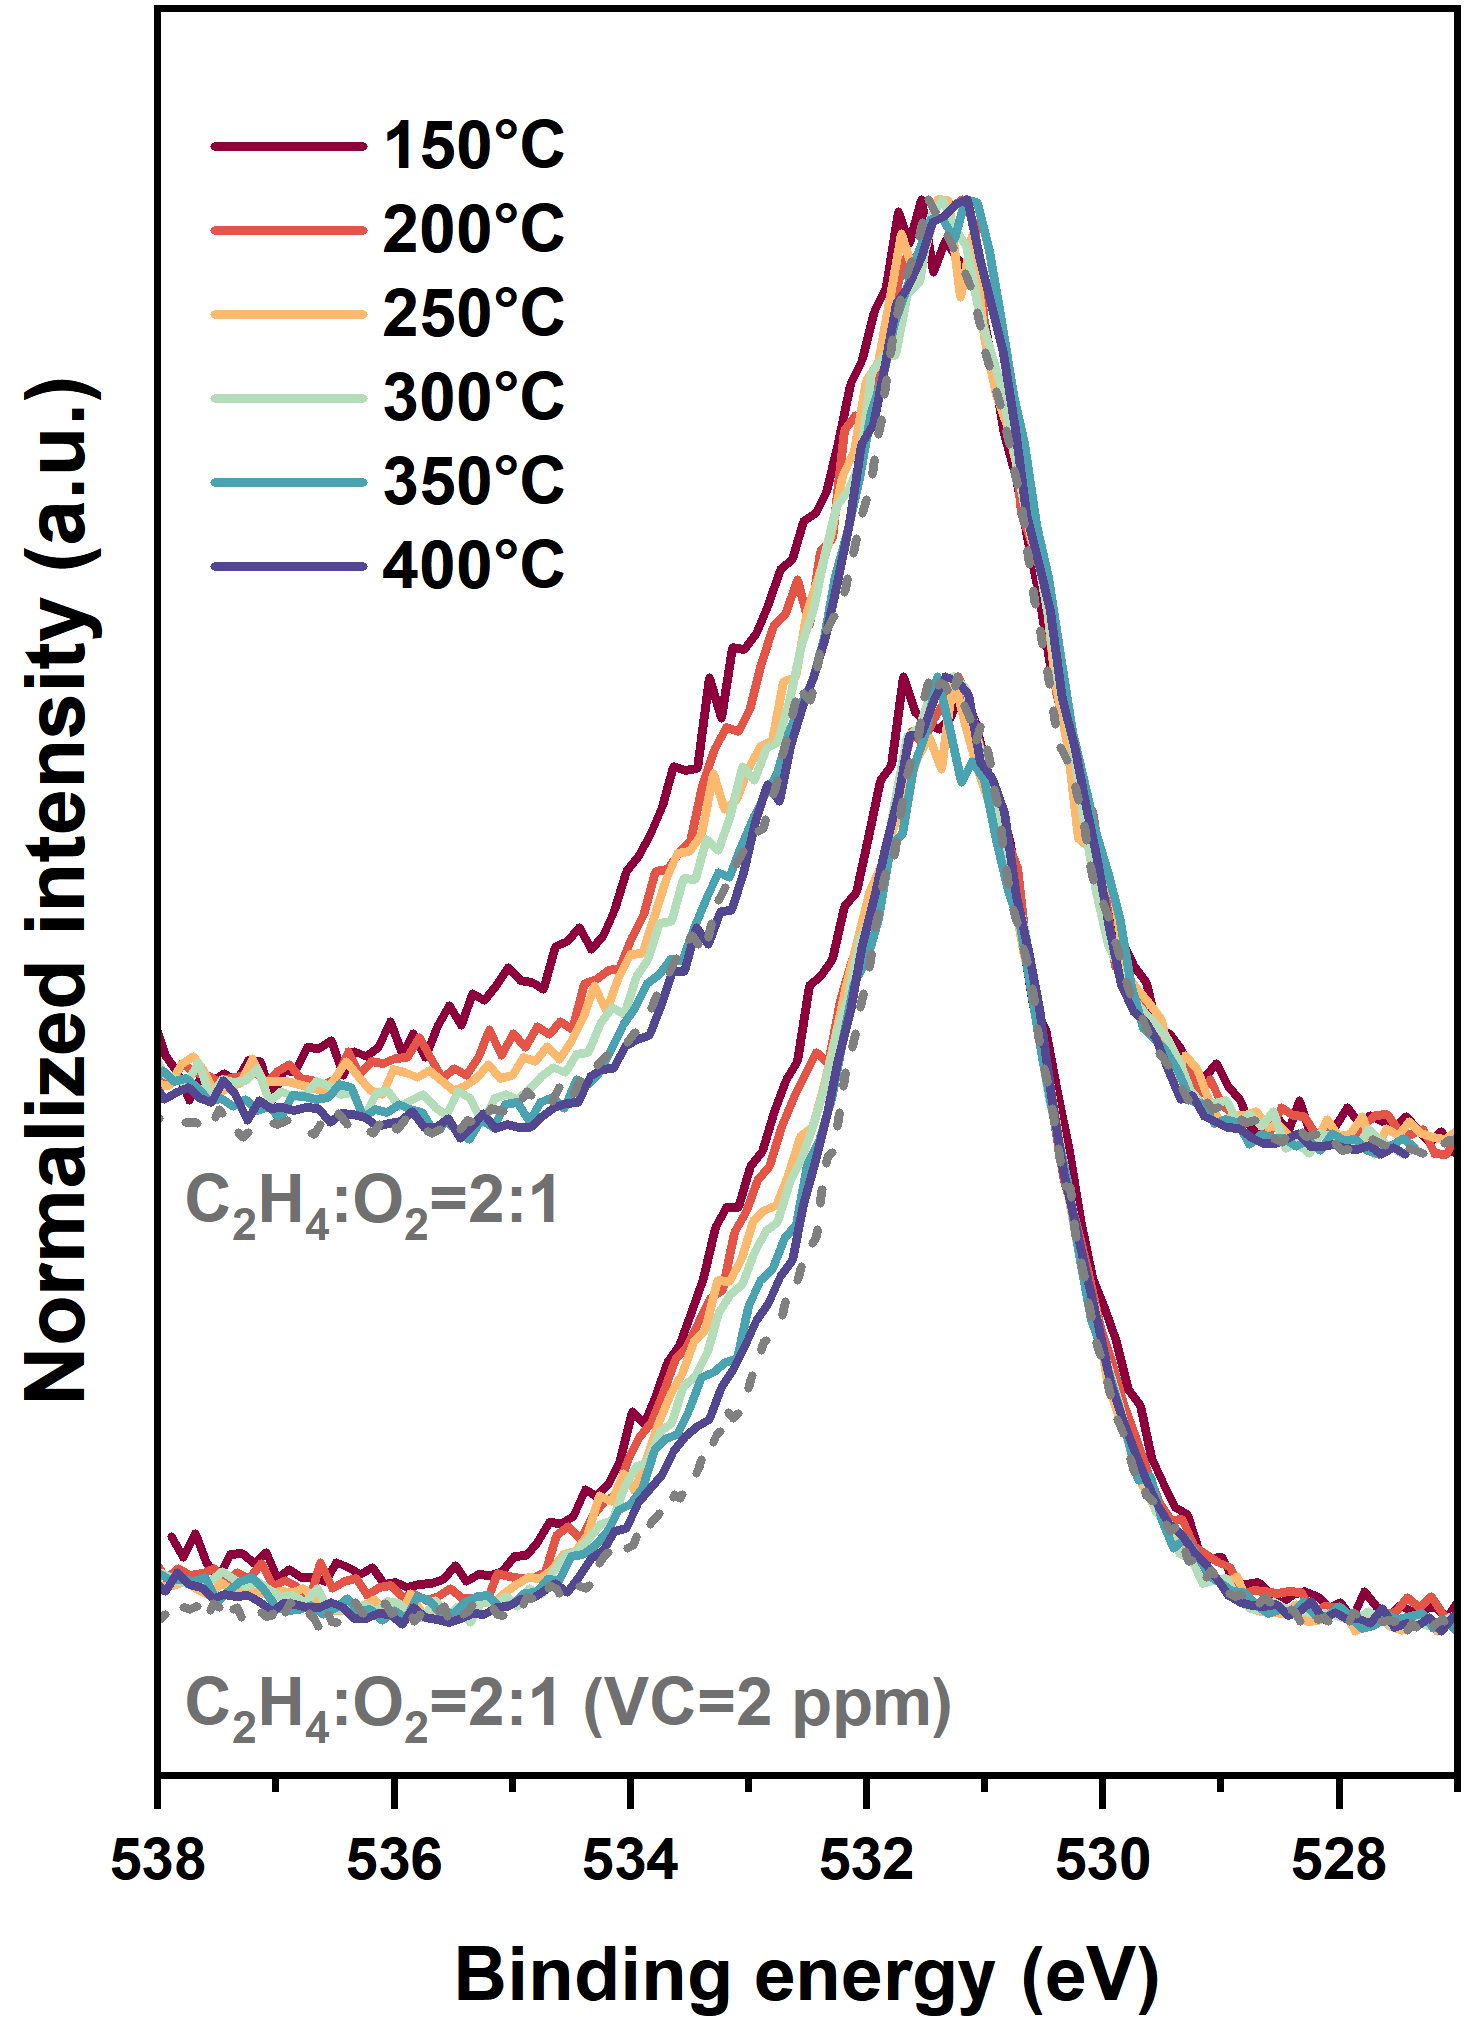


**Supplementary Figure 15.** O 1s spectra (normalized by intensity) of Ag/Al2O3 collected at different temperatures during exposure to a C2H4:O2 (2:1) gas mixture (1 mbar), in the absence or presence of 2 ppm vinyl chloride (KE=300 eV), respectively. The dashed lines represent reference spectra acquired from two samples under HV prior to gas exposure.

**
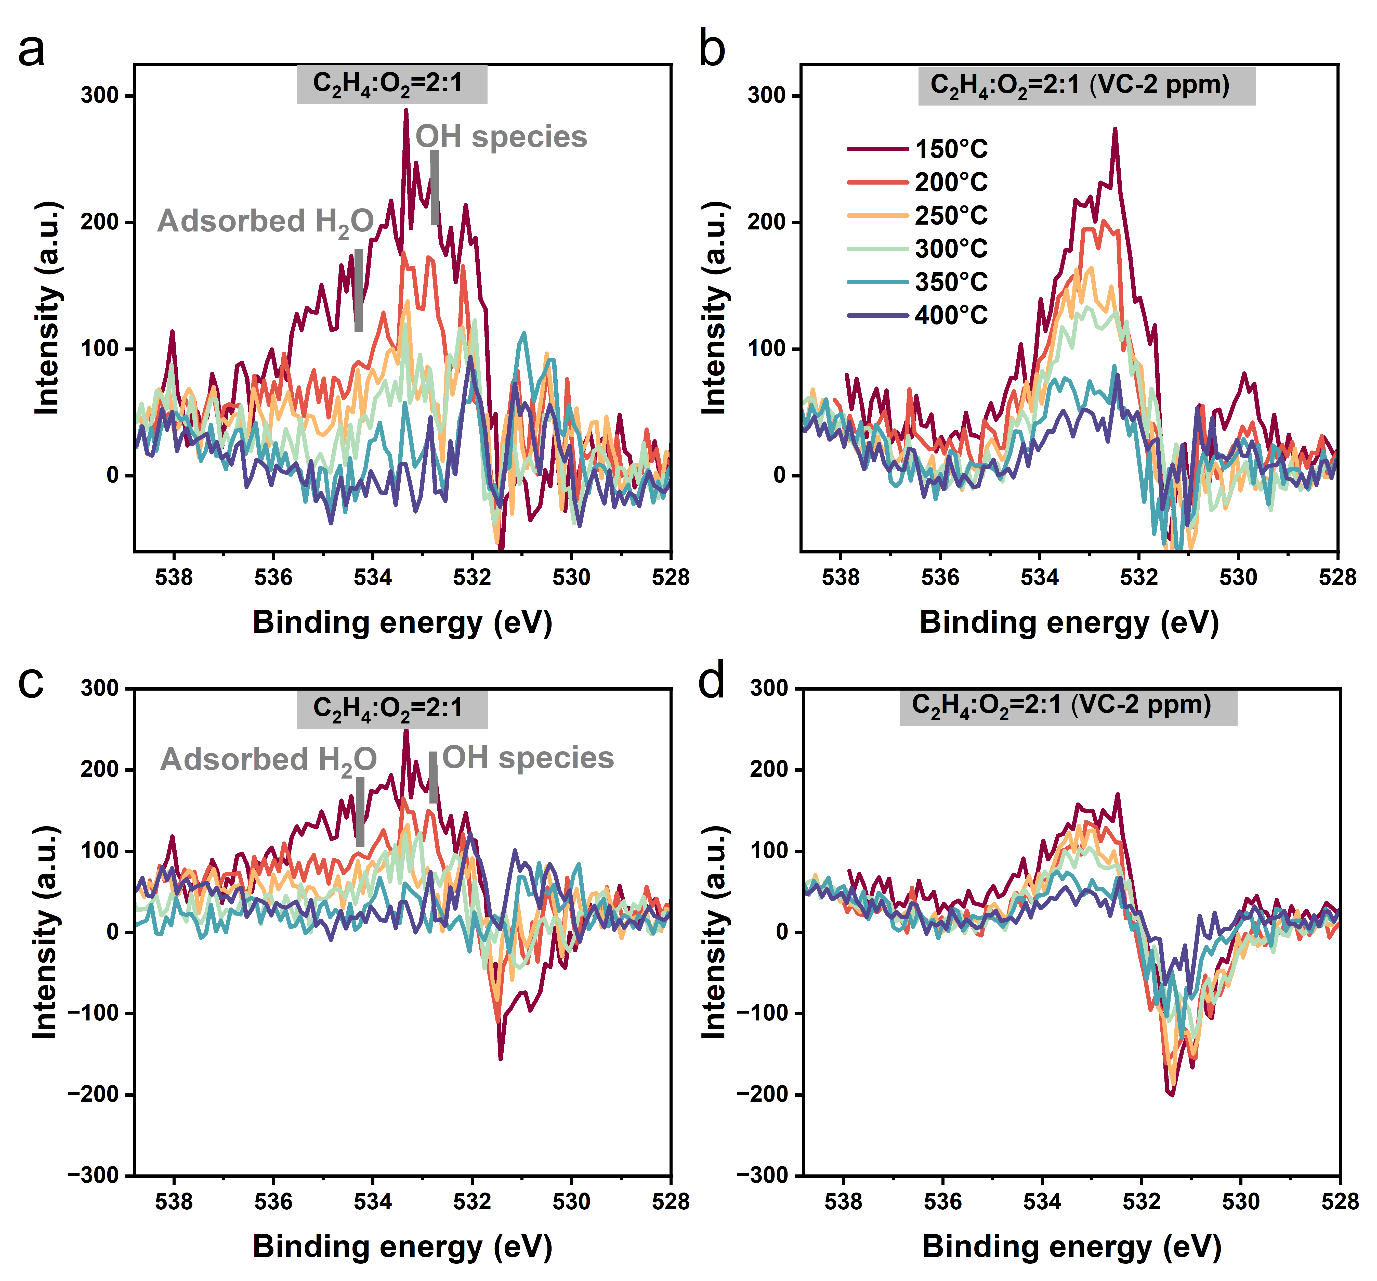
**

**Supplementary Figure 16.** O 1s difference spectra of Ag/Al2O3 acquired at a kinetic energy of 300 eV during exposure to a C2H4:O2 (2:1) mixture at 1 mbar **a,** in the absence and **b,** in the presence of 2 ppm vinyl chloride over a temperature range from 150 °C to 400 °C. The spectrum collected under HV prior to gas exposure from each sample was used as a reference to generate the difference spectra. All spectra were normalized by intensity prior to subtraction. **c-d,** O 1sdifference spectra obtained normalizing all O 1s spectra to the area prior to subtraction. Both methods show the presence of adsorbed hydroxyls and water under EPO conditions. Difference spectra obtained using area-normalized spectra highlight a negative contribution centered at 531.4 eV and corresponding to lattice oxygen from the Al2O3 support.


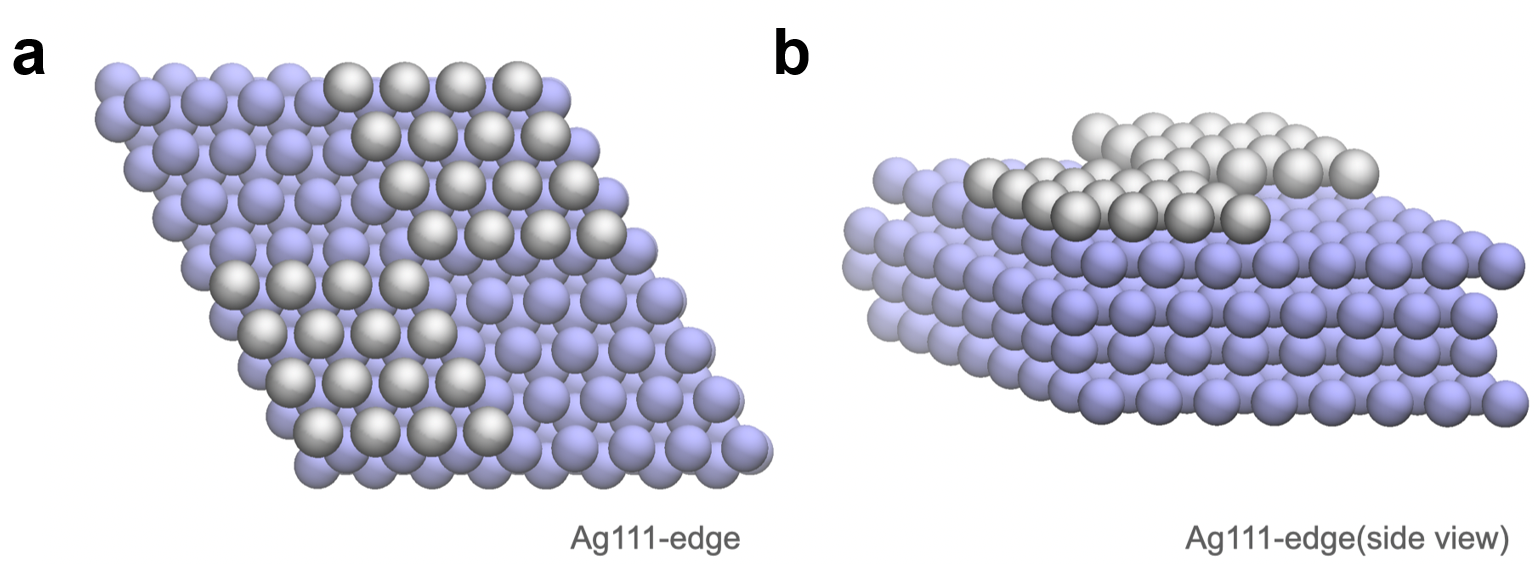


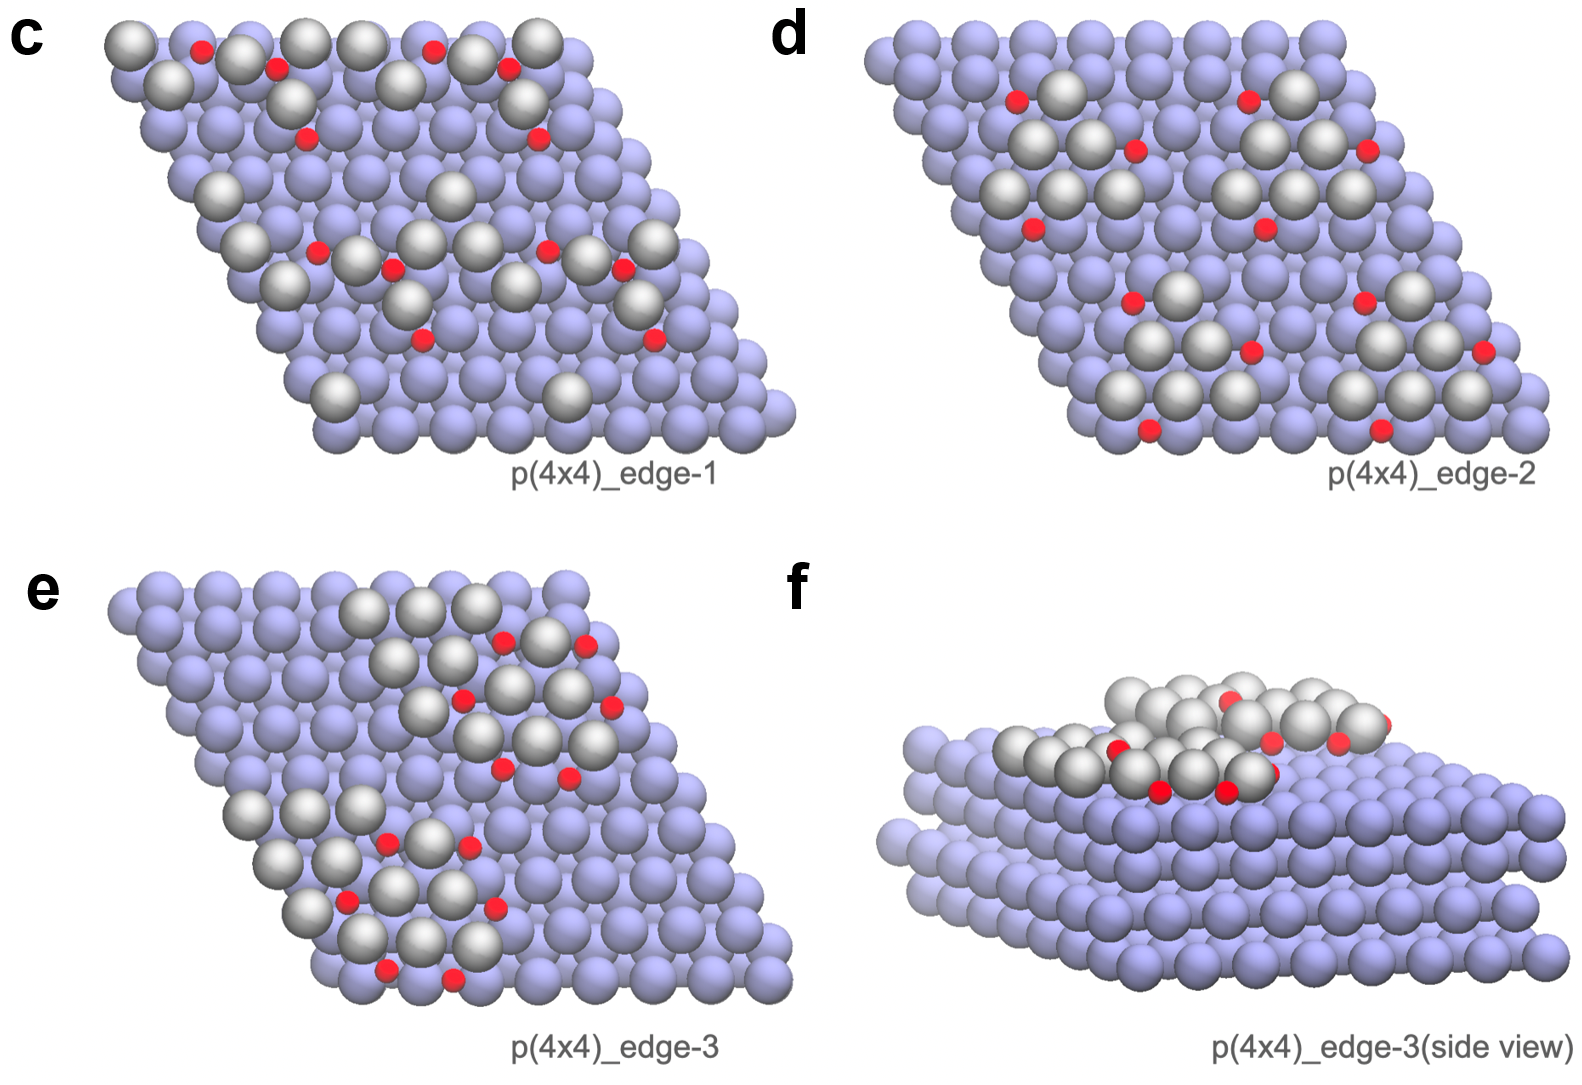


**Supplementary Figure 17.** **a-b,** Top view and side view of Ag(111) with edge sites. **c–e,** Top views of p(4×4)_edge-1 to p(4×4)_edge-3. **f,** Side view of p(4×4)_edge-3. Simulated O 1s binding energies for p(4×4)_edge-3 range from 528.96 to 529.21 eV. Color code: surface Ag, silver; subsurface Ag, purple; O, red.


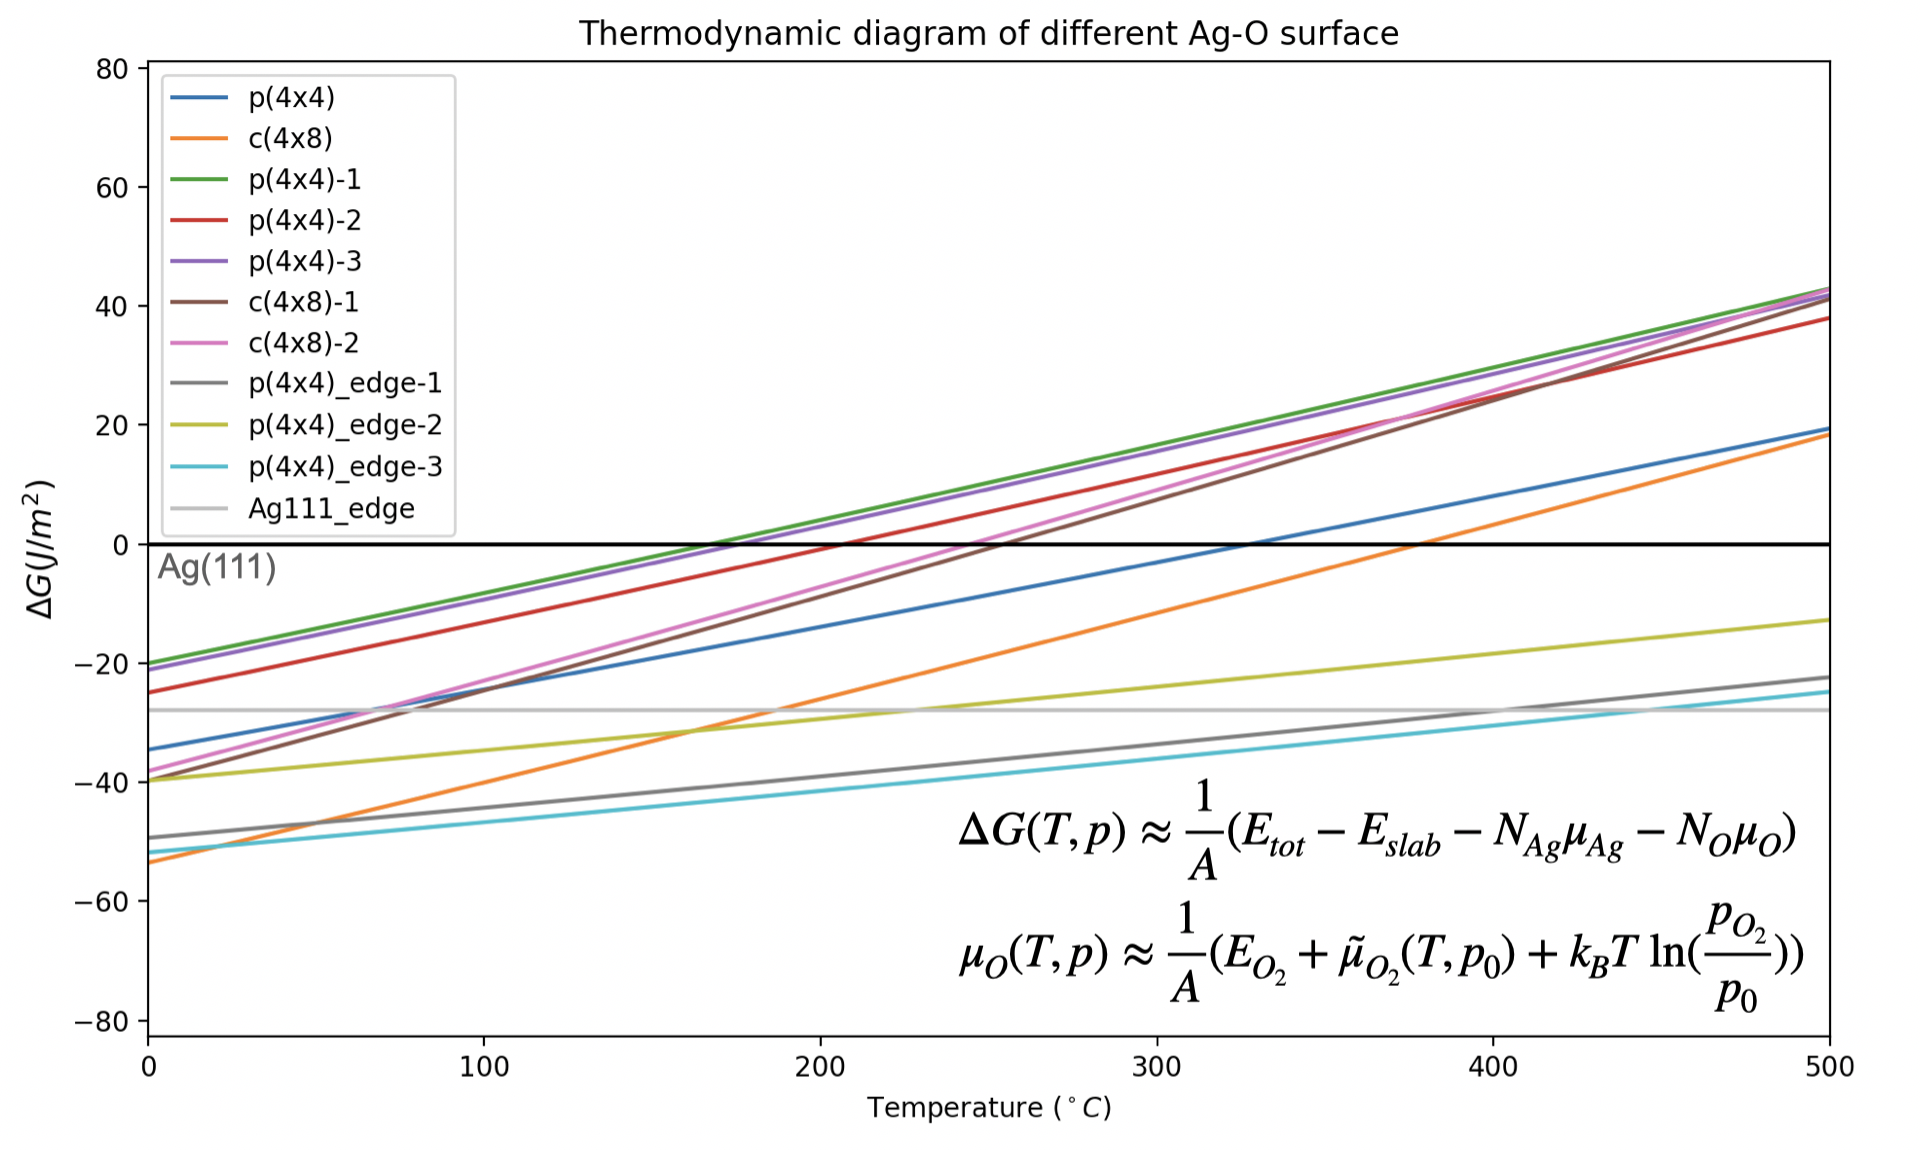


**Supplementary Figure 18.** Thermodynamic diagram of various silver surfaces, plotted based on the static thermodynamic function listed on the right corner, under a constant pressure of O2. The structures of p(4×4)-1 to c(4×8)-2 are shown in Figure 4b–f of our previous work.1


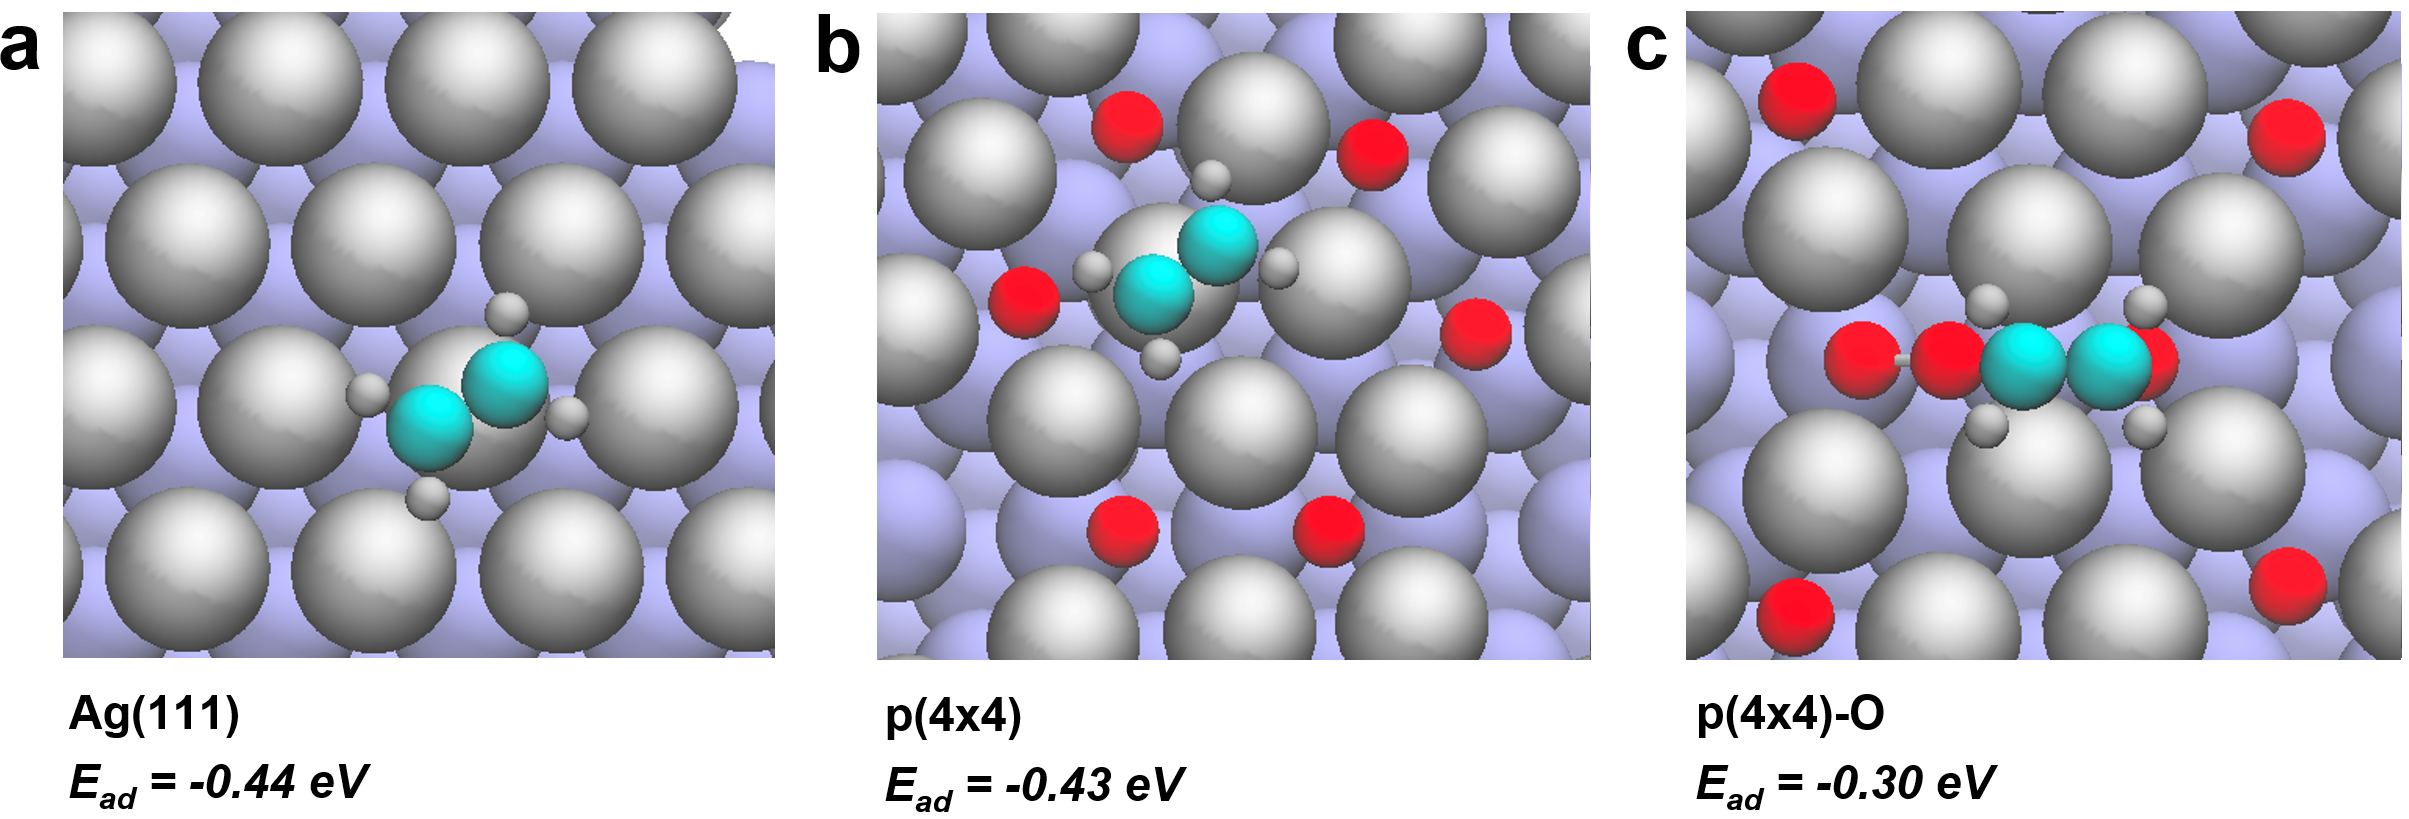

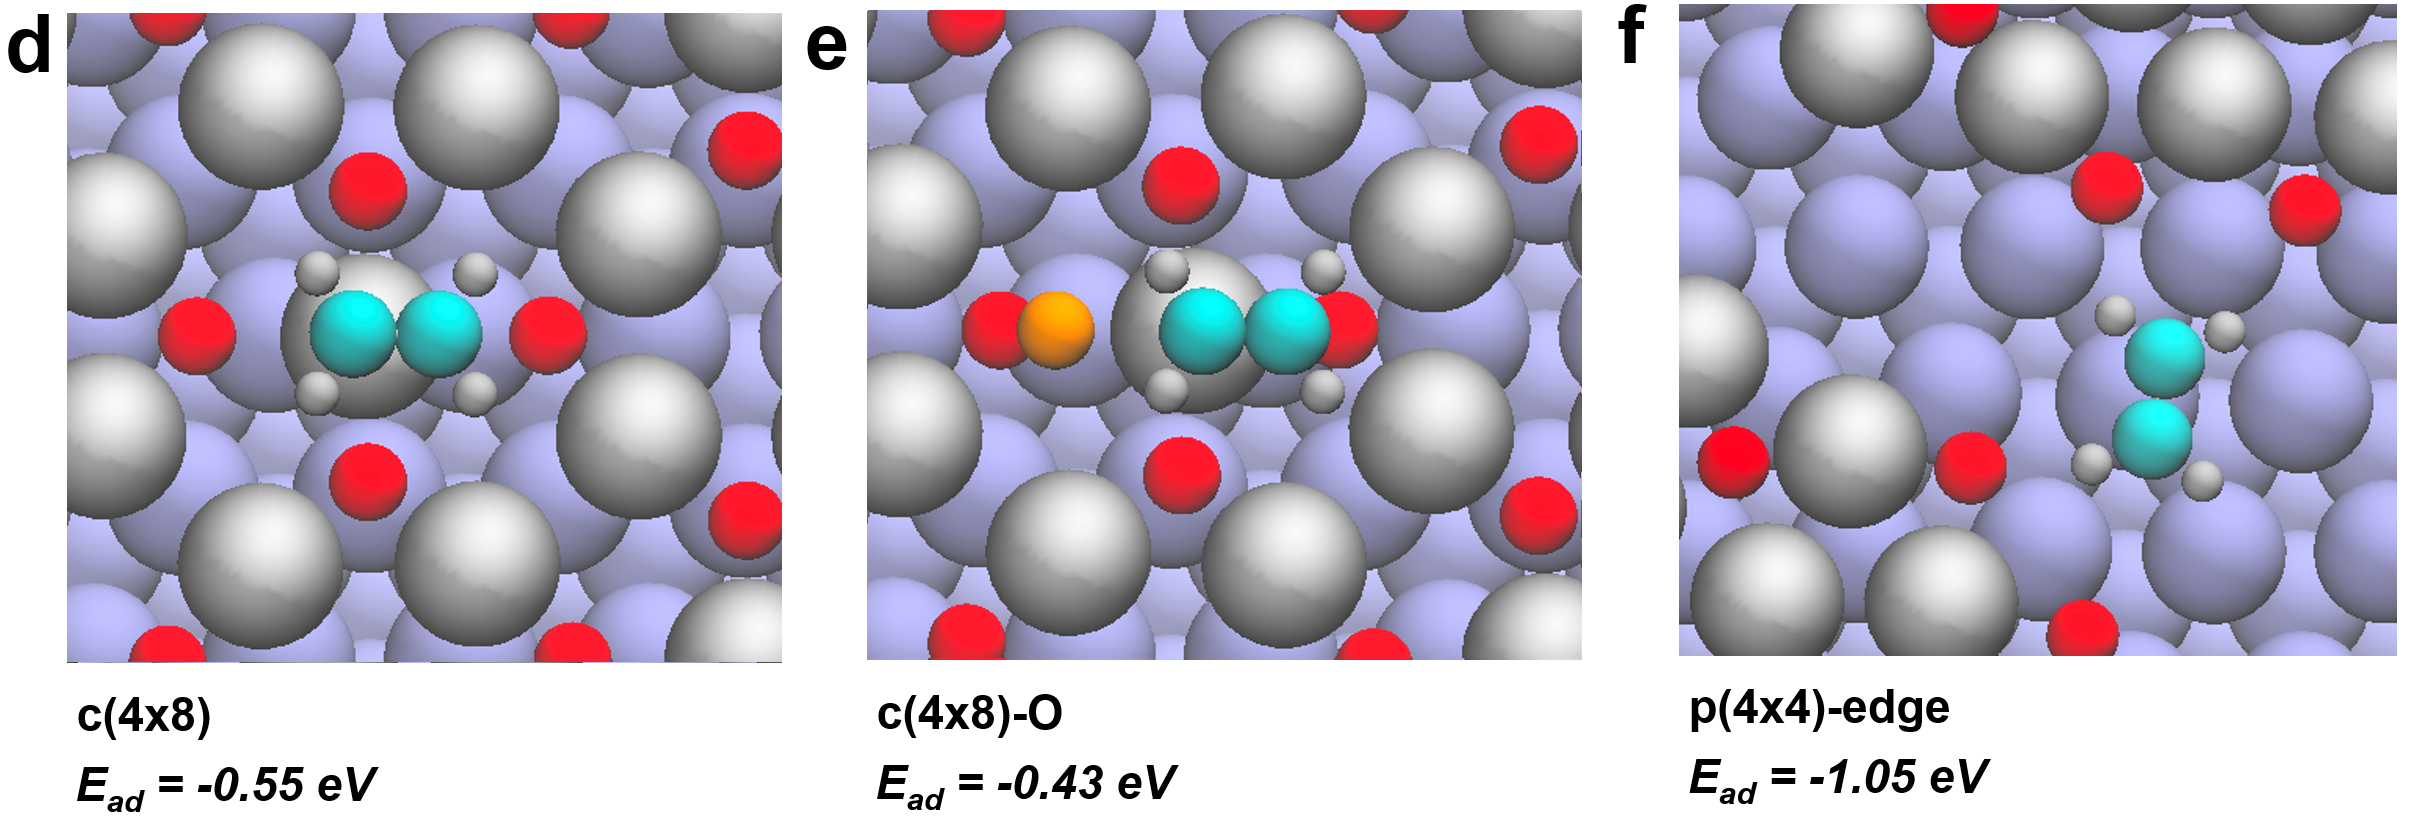


**Supplementary Figure 19.** Optimized configurations of C2H4 on various silver surfaces. The color code follows that of Supplementary Fig. 17, with dioxygen marked in orange.


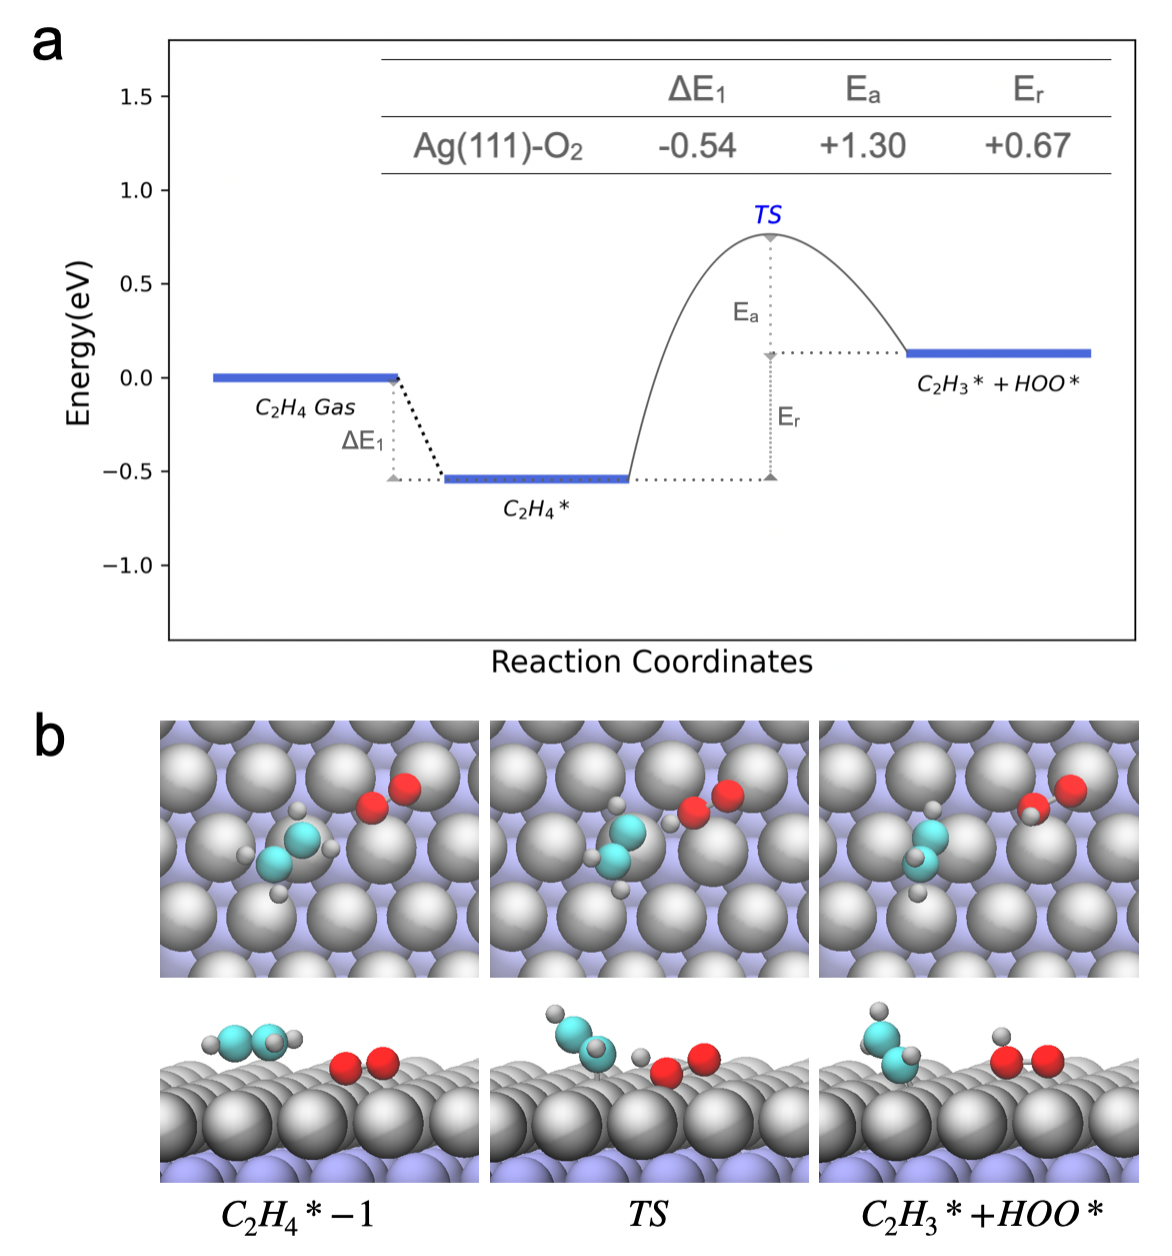


**Supplementary Figure 20.** **a,** Calculated energy profile for ethylene dehydrogenation on Ag(111) facet, facilitated by adsorbed dioxygen. Asterisk denotes adsorbate. **b,** Reaction snapshots along the pathway on Ag(111). The color code follows that of Supplementary Fig. 17, with carbon and hydrogen marked in blue and light grey, respectively.


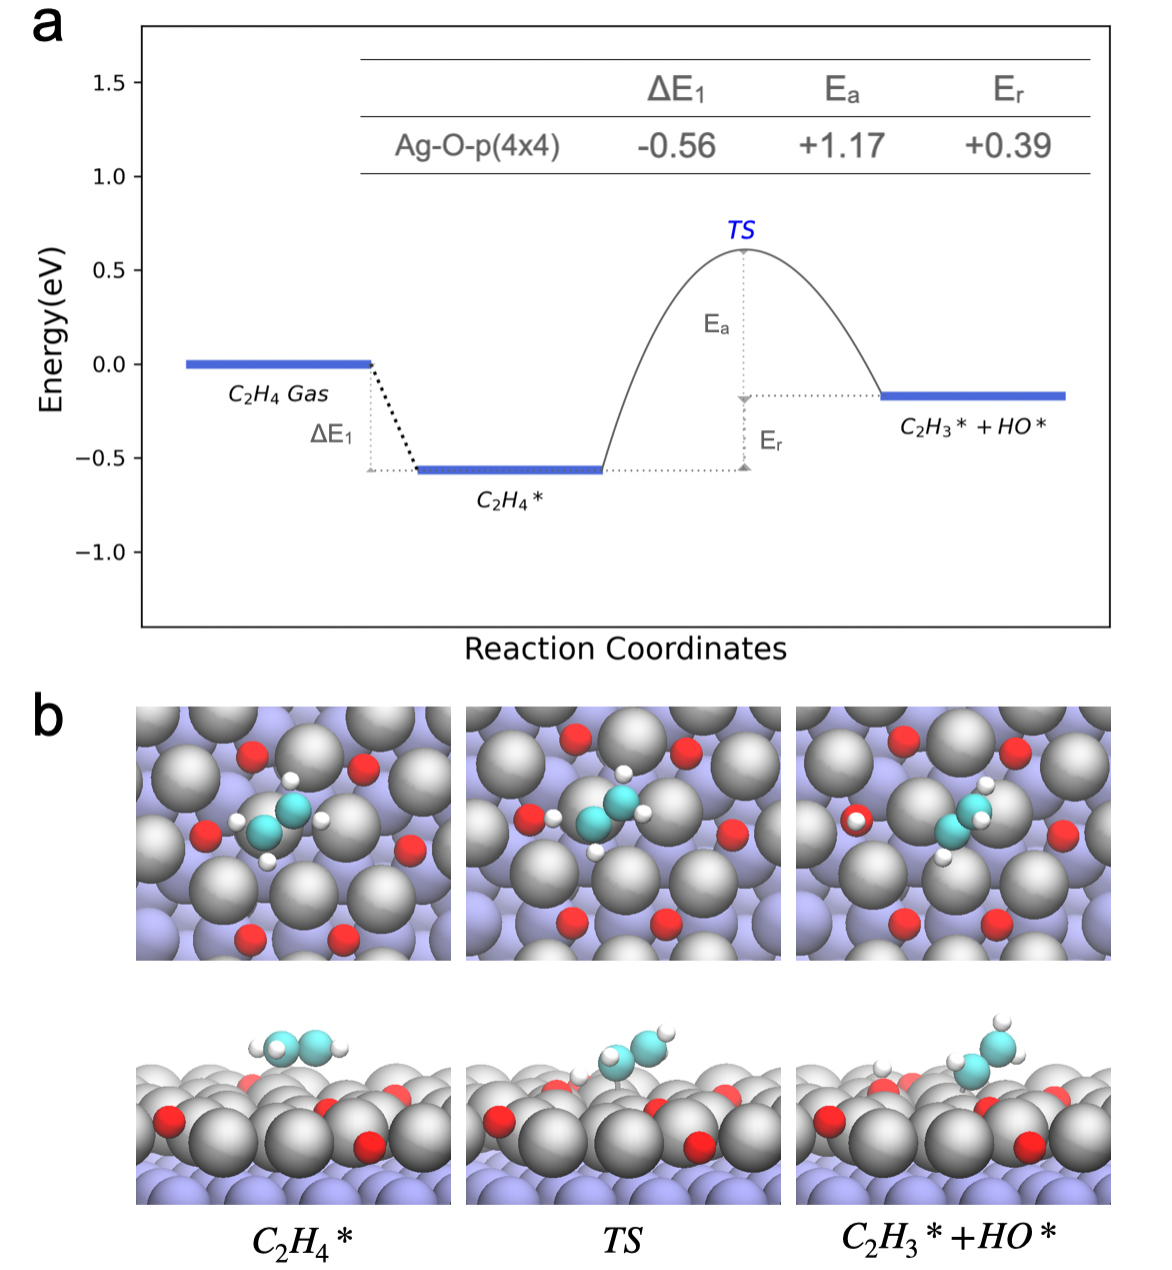


**Supplementary Figure 21.** **a,** Calculated energy profile for ethylene dehydrogenation on p(4x4) reconstructed surface, facilitated by lattice oxygen. Asterisk denotes adsorbate. **b,** Reaction snapshots along the pathway on p(4x4). The color code follows that of Supplementary Fig. 17, with carbon and hydrogen marked in blue and white, respectively.


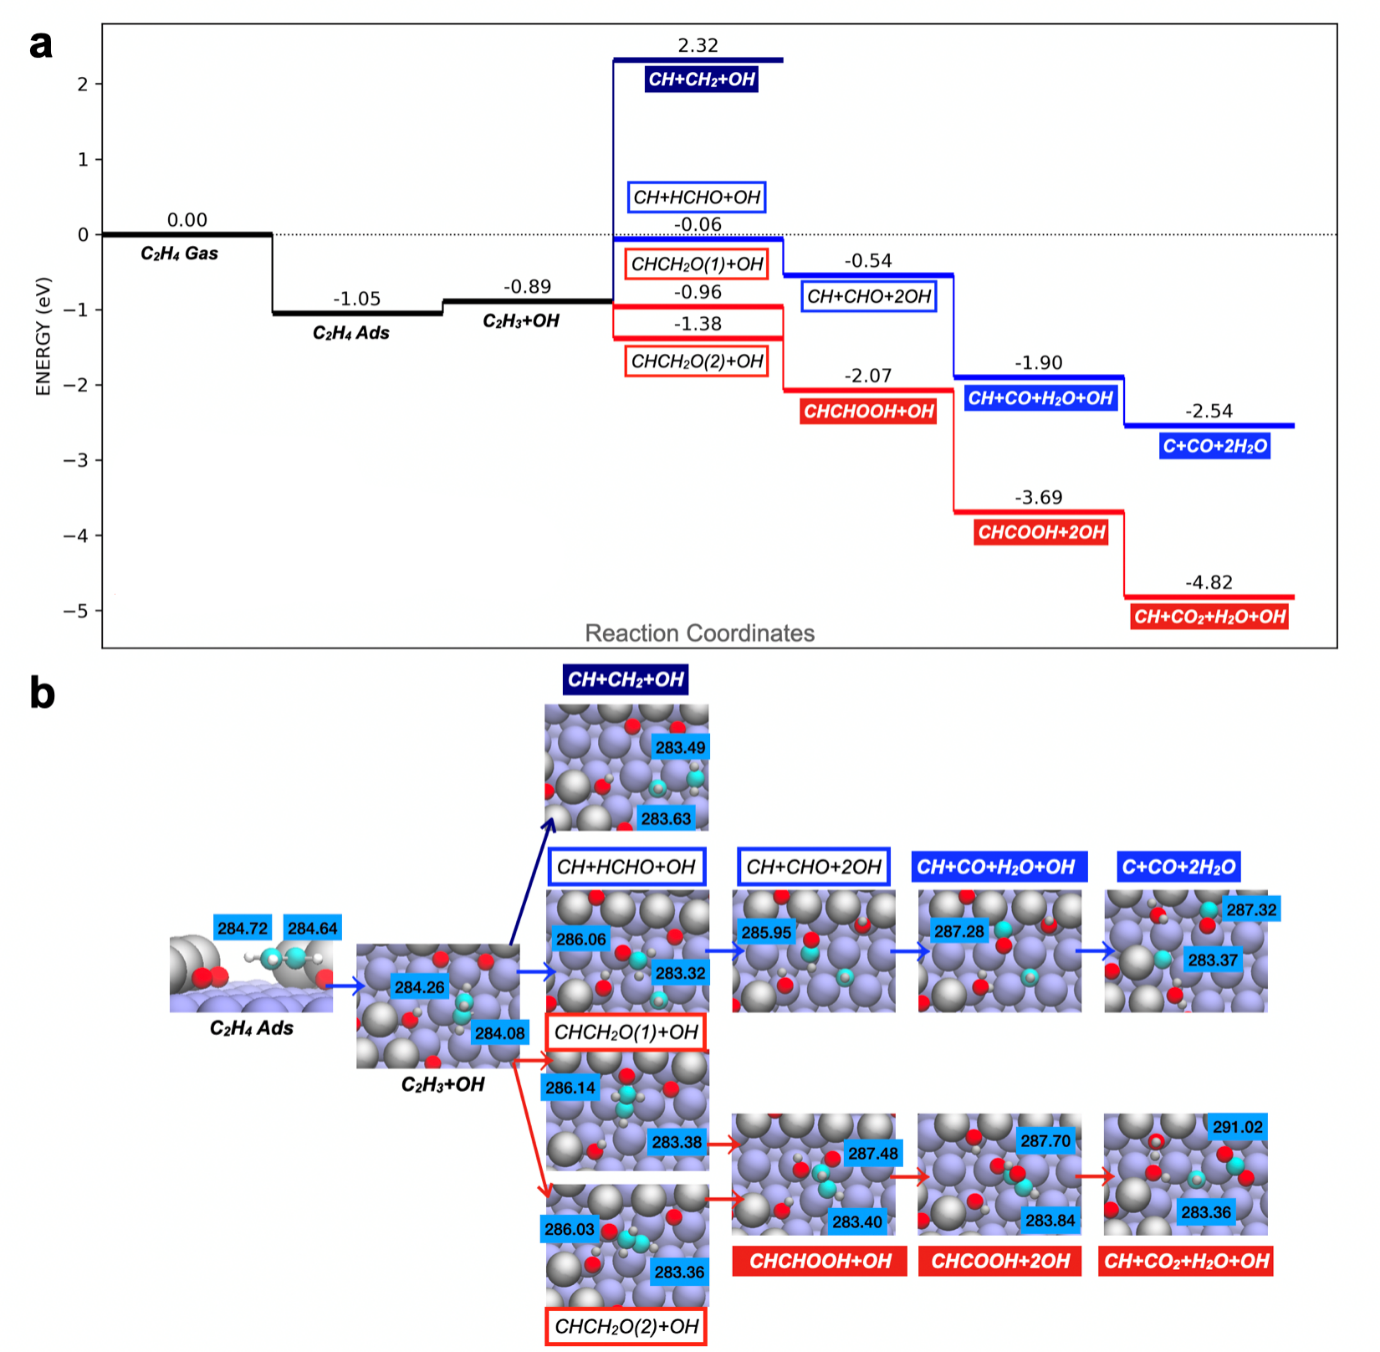


**Supplementary Figure 22. a,** Calculated energy profiles for three possible CO2 formation pathways on a silver defect site via dehydrogenation. **b,** Reaction snapshots illustrating key intermediates along different pathways on the defect site.

**
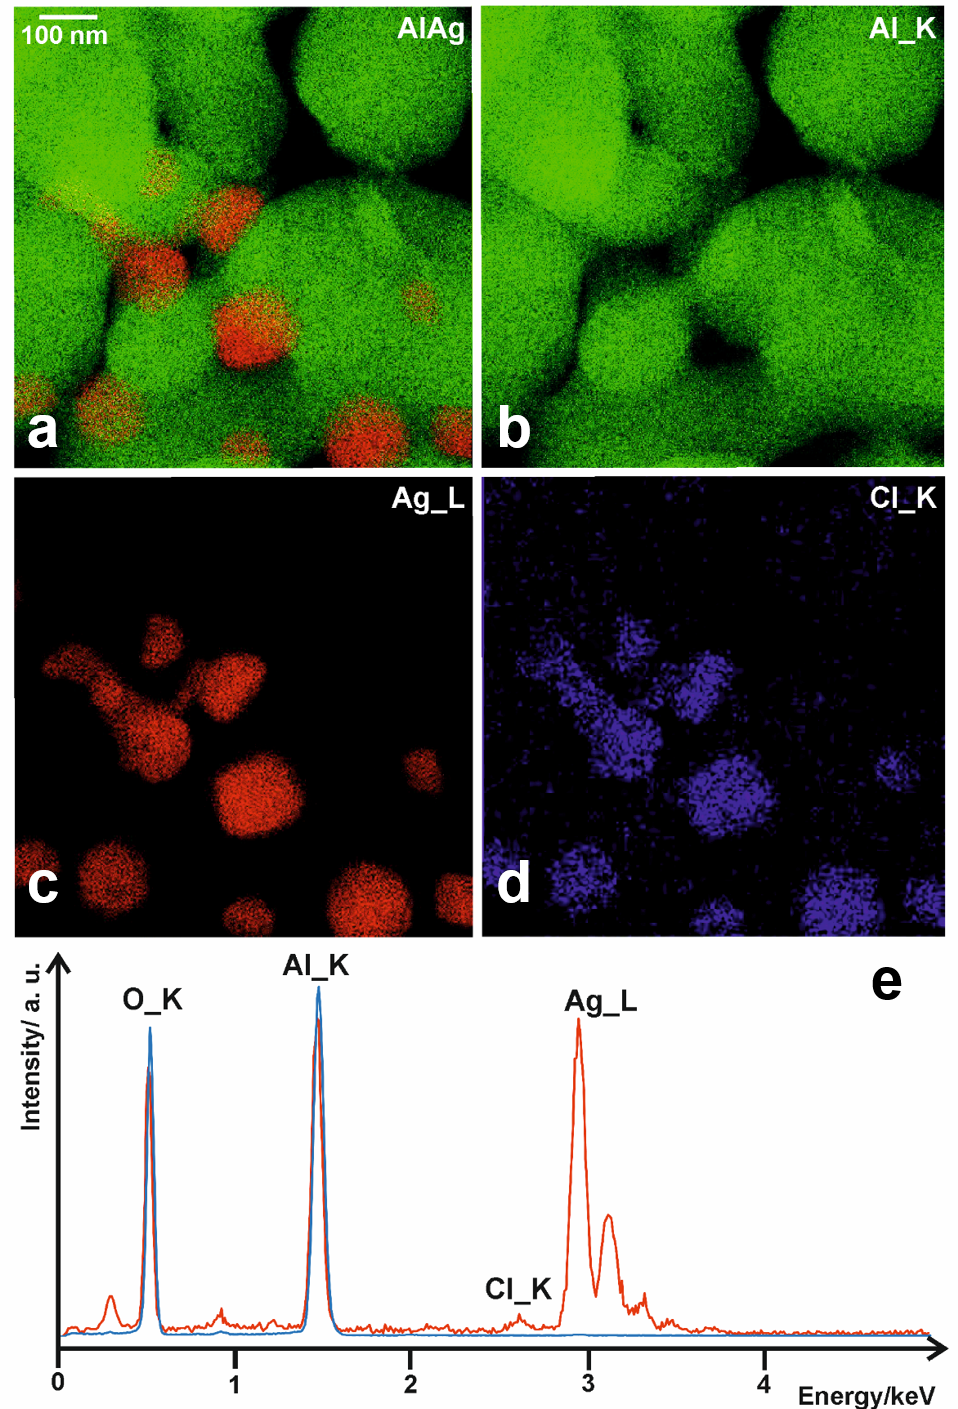
**

**Supplementary Figure 23.** a, EDX mapping of Al and Ag; b, Al; c, Ag; d, Cl of spent Ag/Al2O3 catalyst after exposure to steady-state ethylene oxidation at 230 °C for 48 hours (Reaction conditions: 15% C2H4, 3% O2, 0.5 ppm vinyl chloride balanced by N2, space velocity = 10000 ml·min-1·g-1). e, Selected regions of the EDX spectra for an Ag particle (red curve) and alumina (blue curve), confirming the presence of Cl at the Ag.


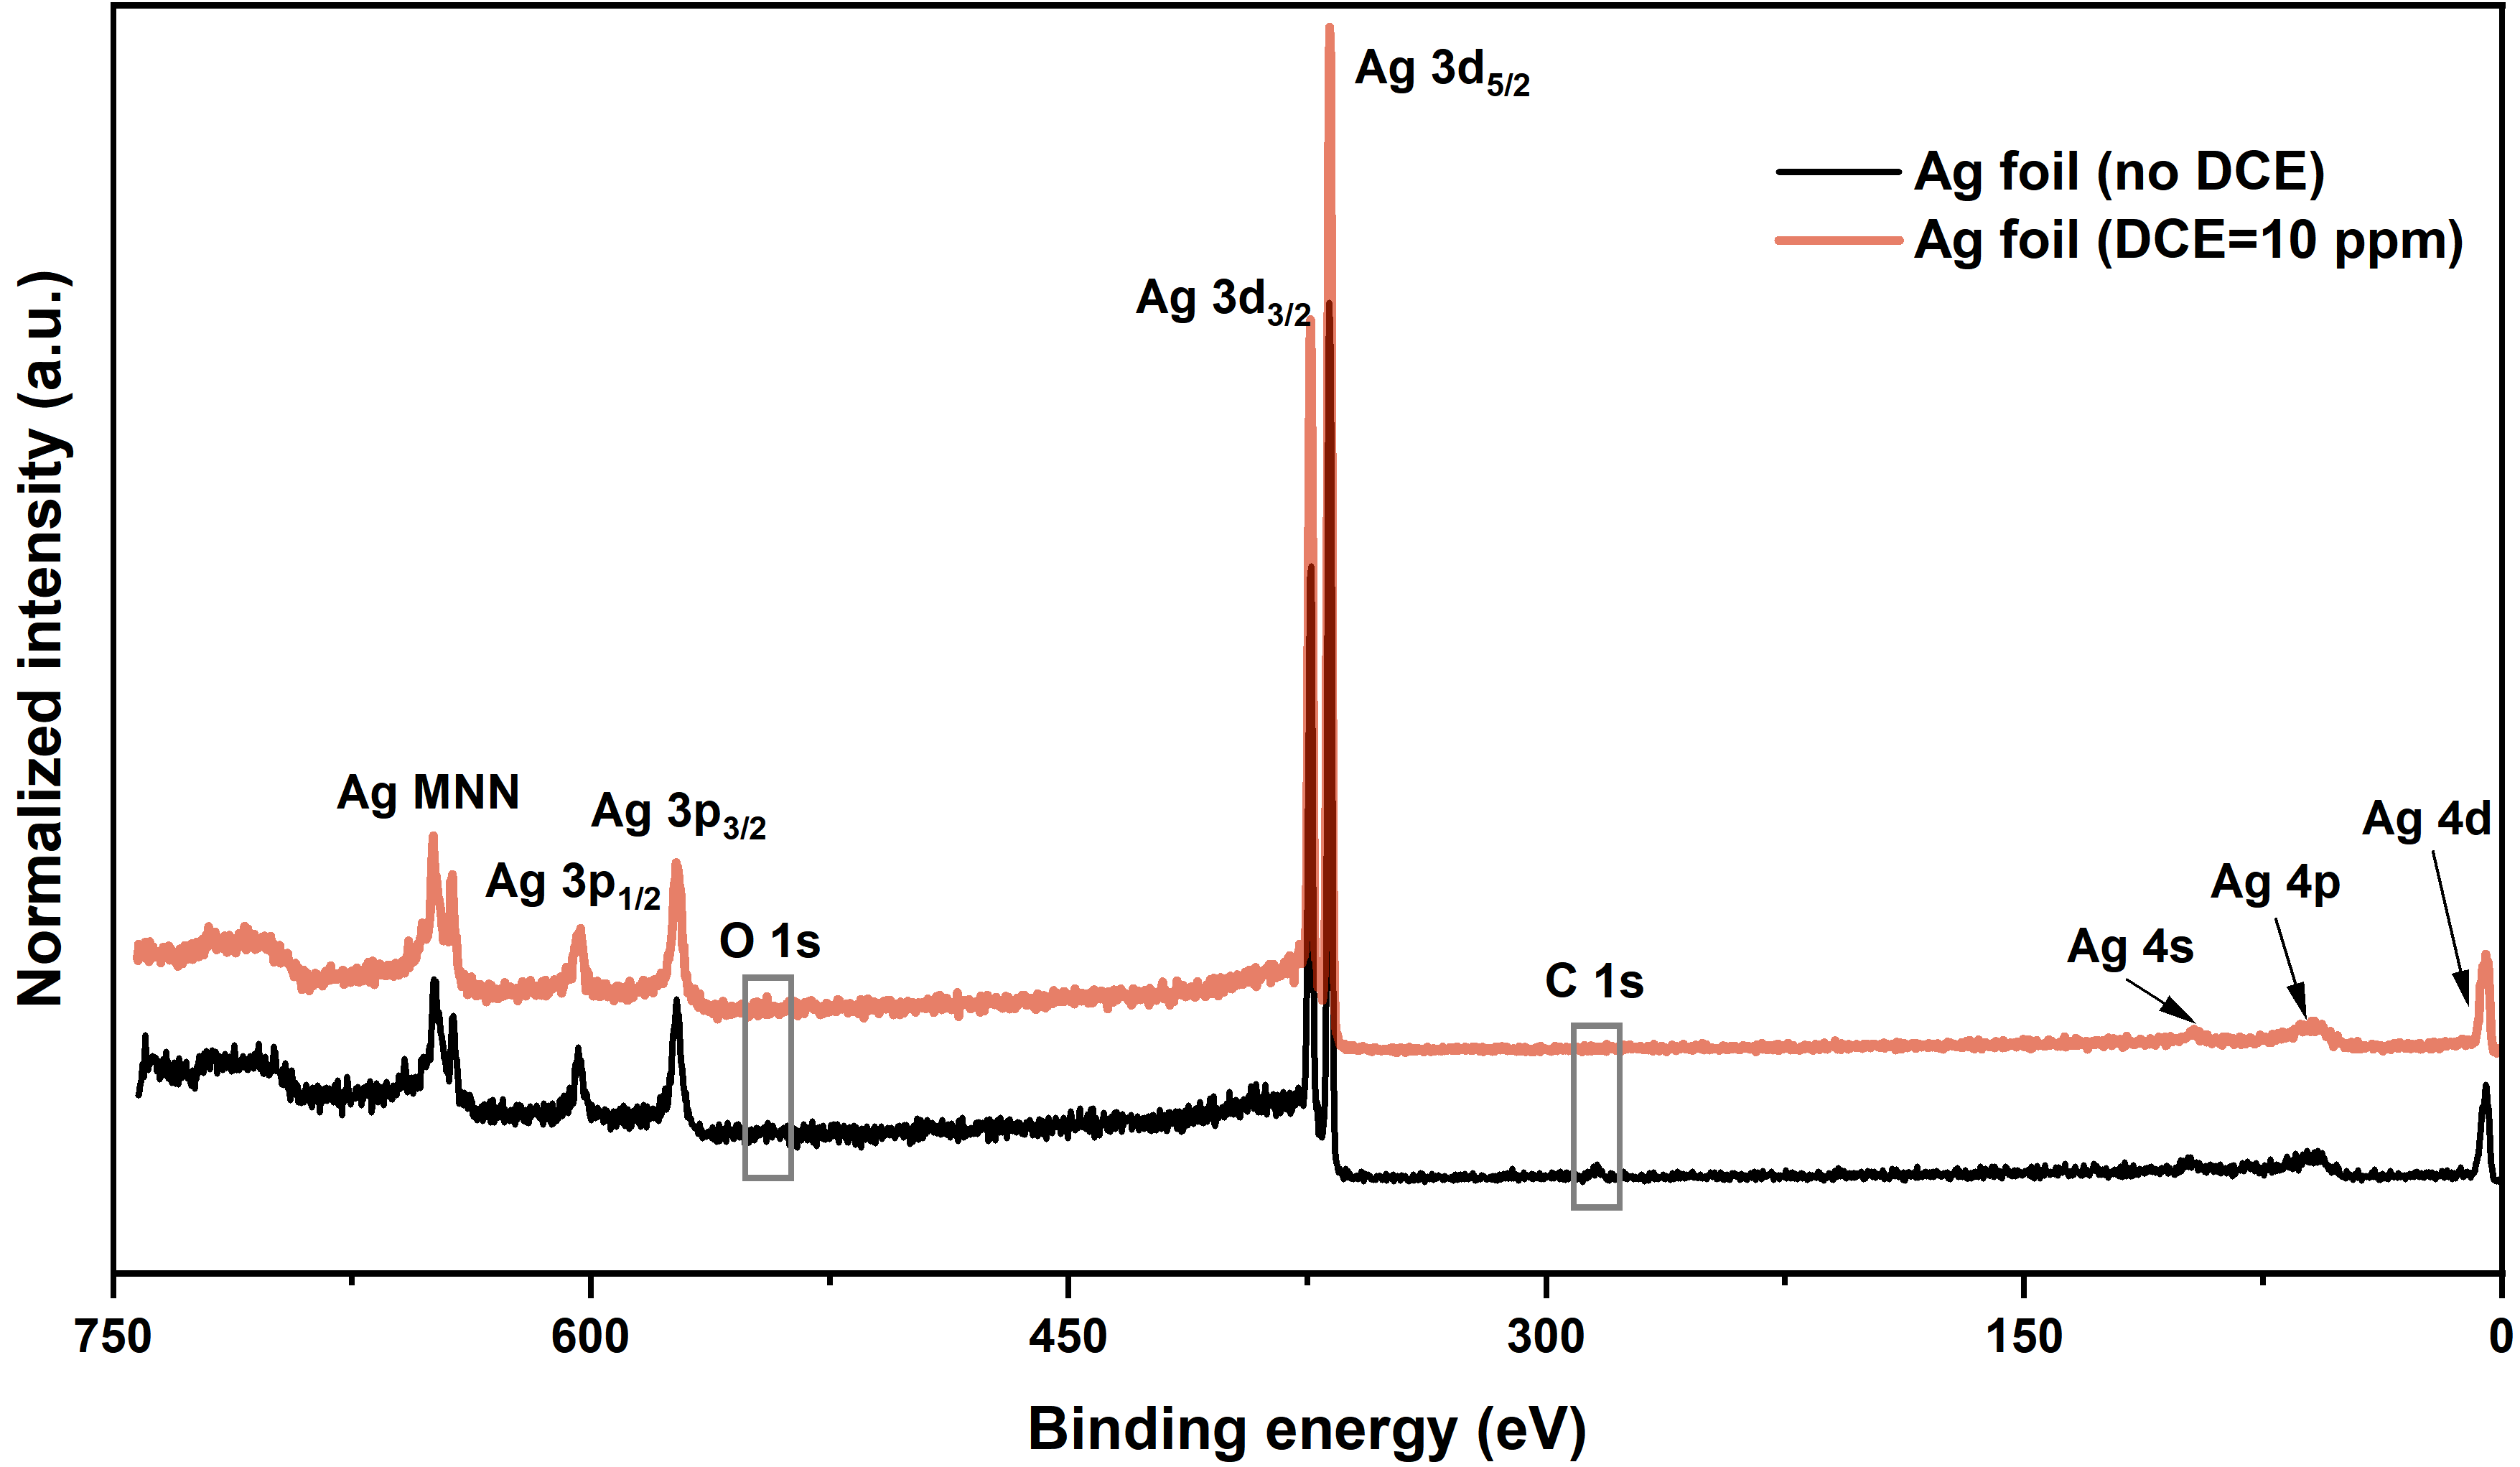


**Supplementary Figure 24.** XPS survey spectra of two Ag foil samples acquired under HV prior to gas exposure (photon energy: 1000 eV). The black and red curves correspond to the samples subsequently exposed to the EPO reaction mixture in the absence or presence of 10 ppm dichloroethane, respectively.


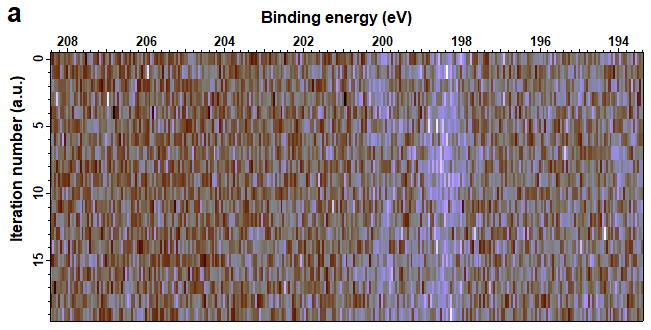


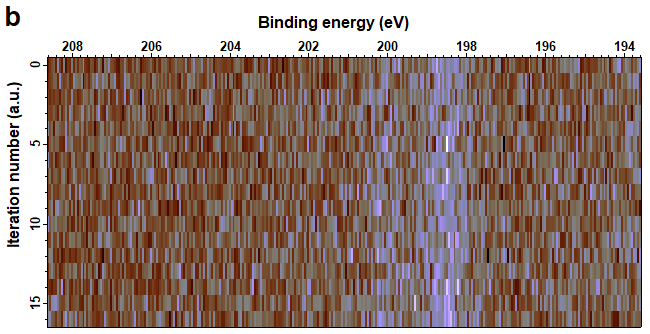


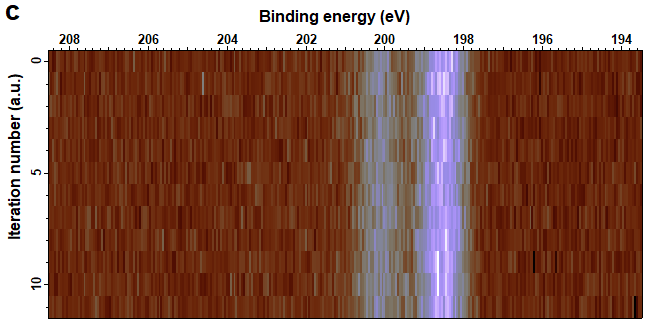


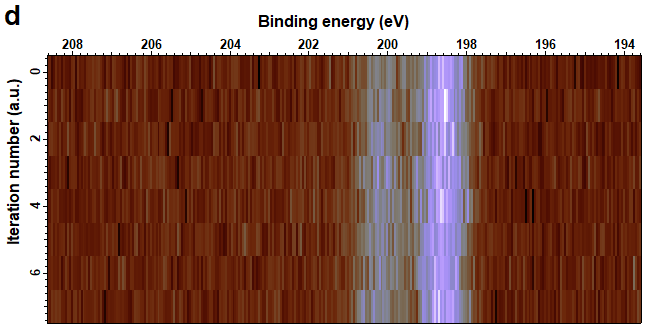


**Supplementary Figure 25.** Time-resolved evolution of Cl 2p spectra acquired at a kinetic energy of 480 eV during exposure of a silver foil sample to 10 ppm dichloroethane in a C2H4:O2 =2:1 gas mixture (1 mbar) at various temperatures: **a,** 100 °C, **b,** 200 °C, **c,** 300 °C, and **d,** 400 °C.


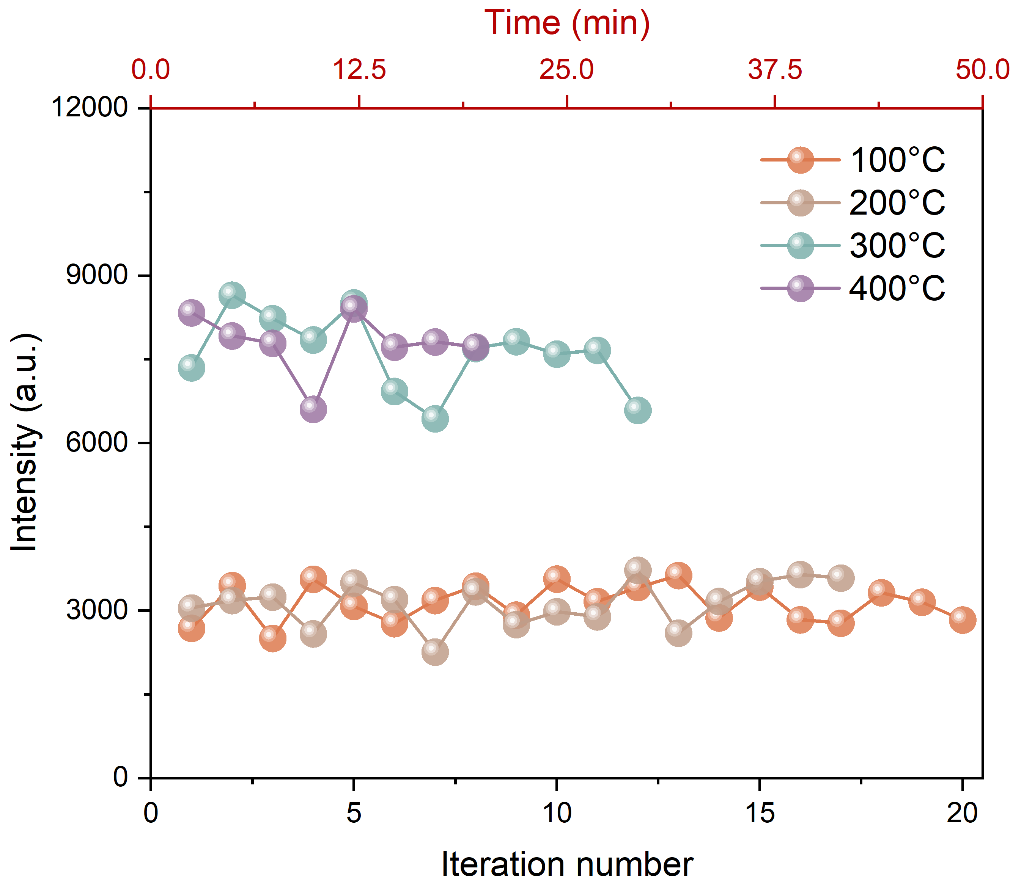


**Supplementary Figure 26.** Intensity evolution of the Cl 2p signal at 198.5 eV (from Supplementary Fig. 23) as a function of iteration number at different temperatures. The Ag foil was exposed to 10 ppm dichloroethane in a C2H4:O2 = 2:1 gas mixture (1 mbar), with four spectra acquired per iteration (KE=480 eV).


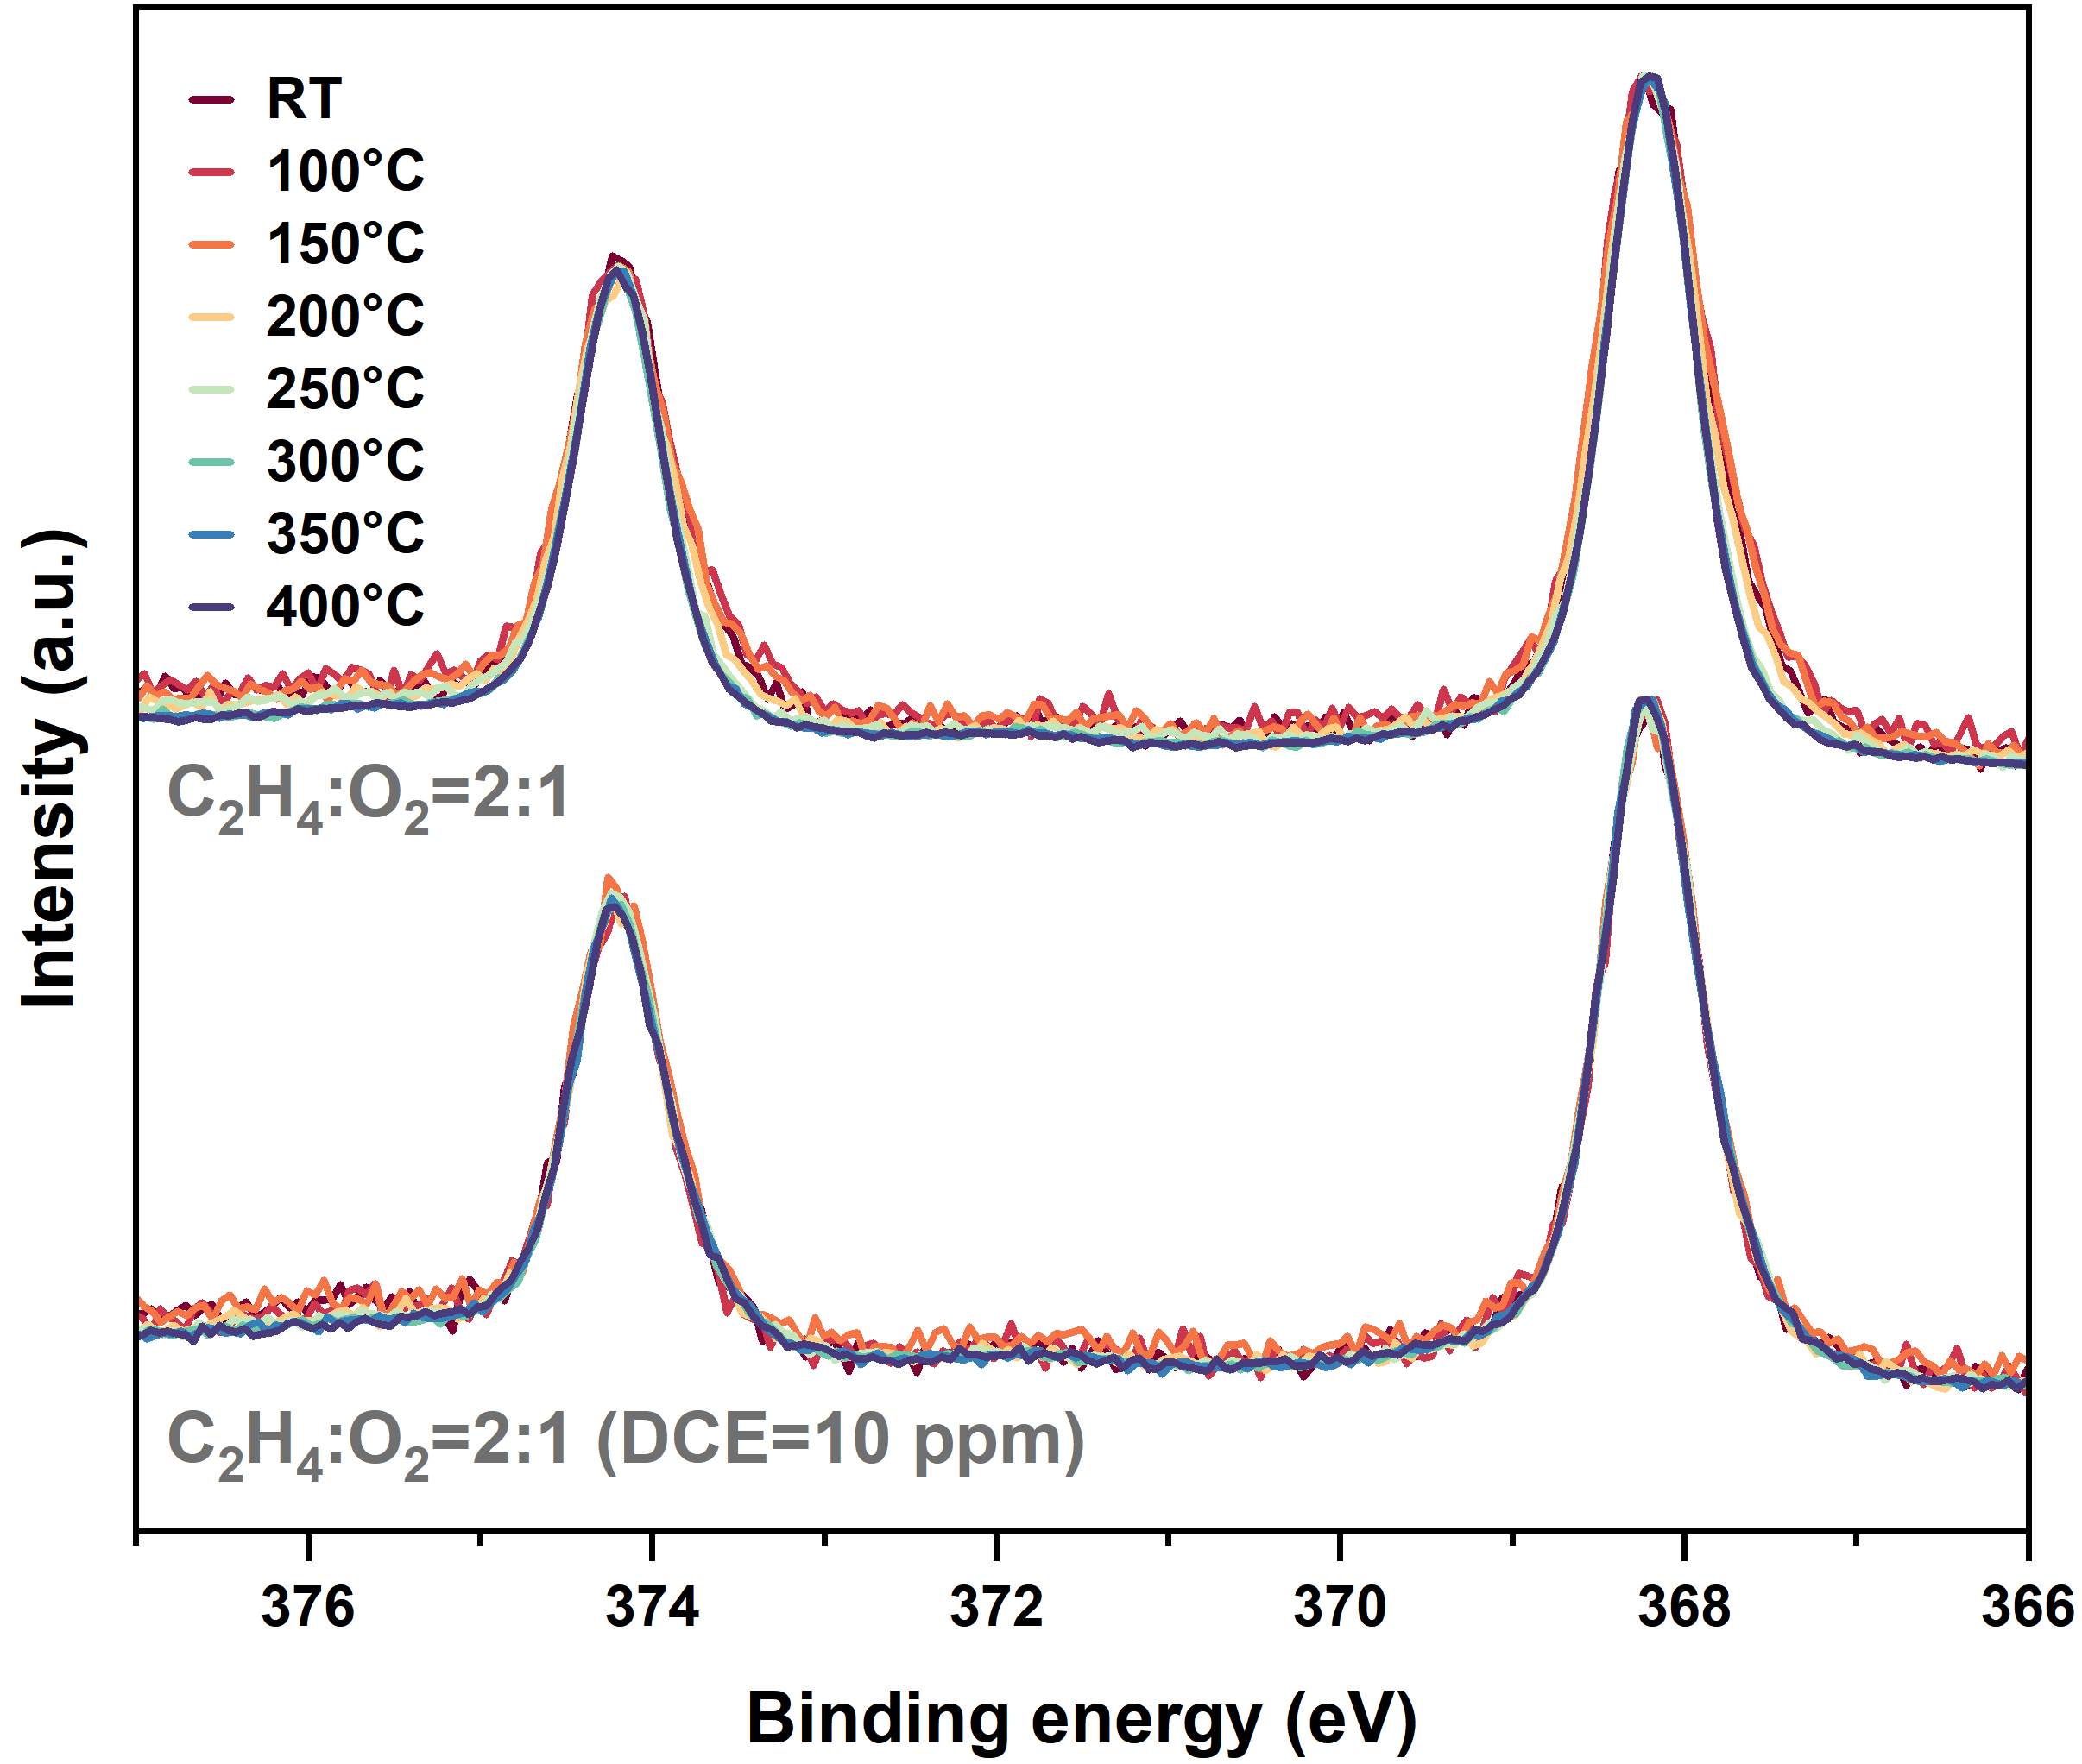


**Supplementary Figure 27.** Ag 3d spectra (normalized by intensity) of two Ag foil samples collected at different temperatures during exposure to a C2H4:O2 (2:1) gas mixture (1 mbar), in the absence or presence of 10 ppm dichloroethane (KE=200 eV).


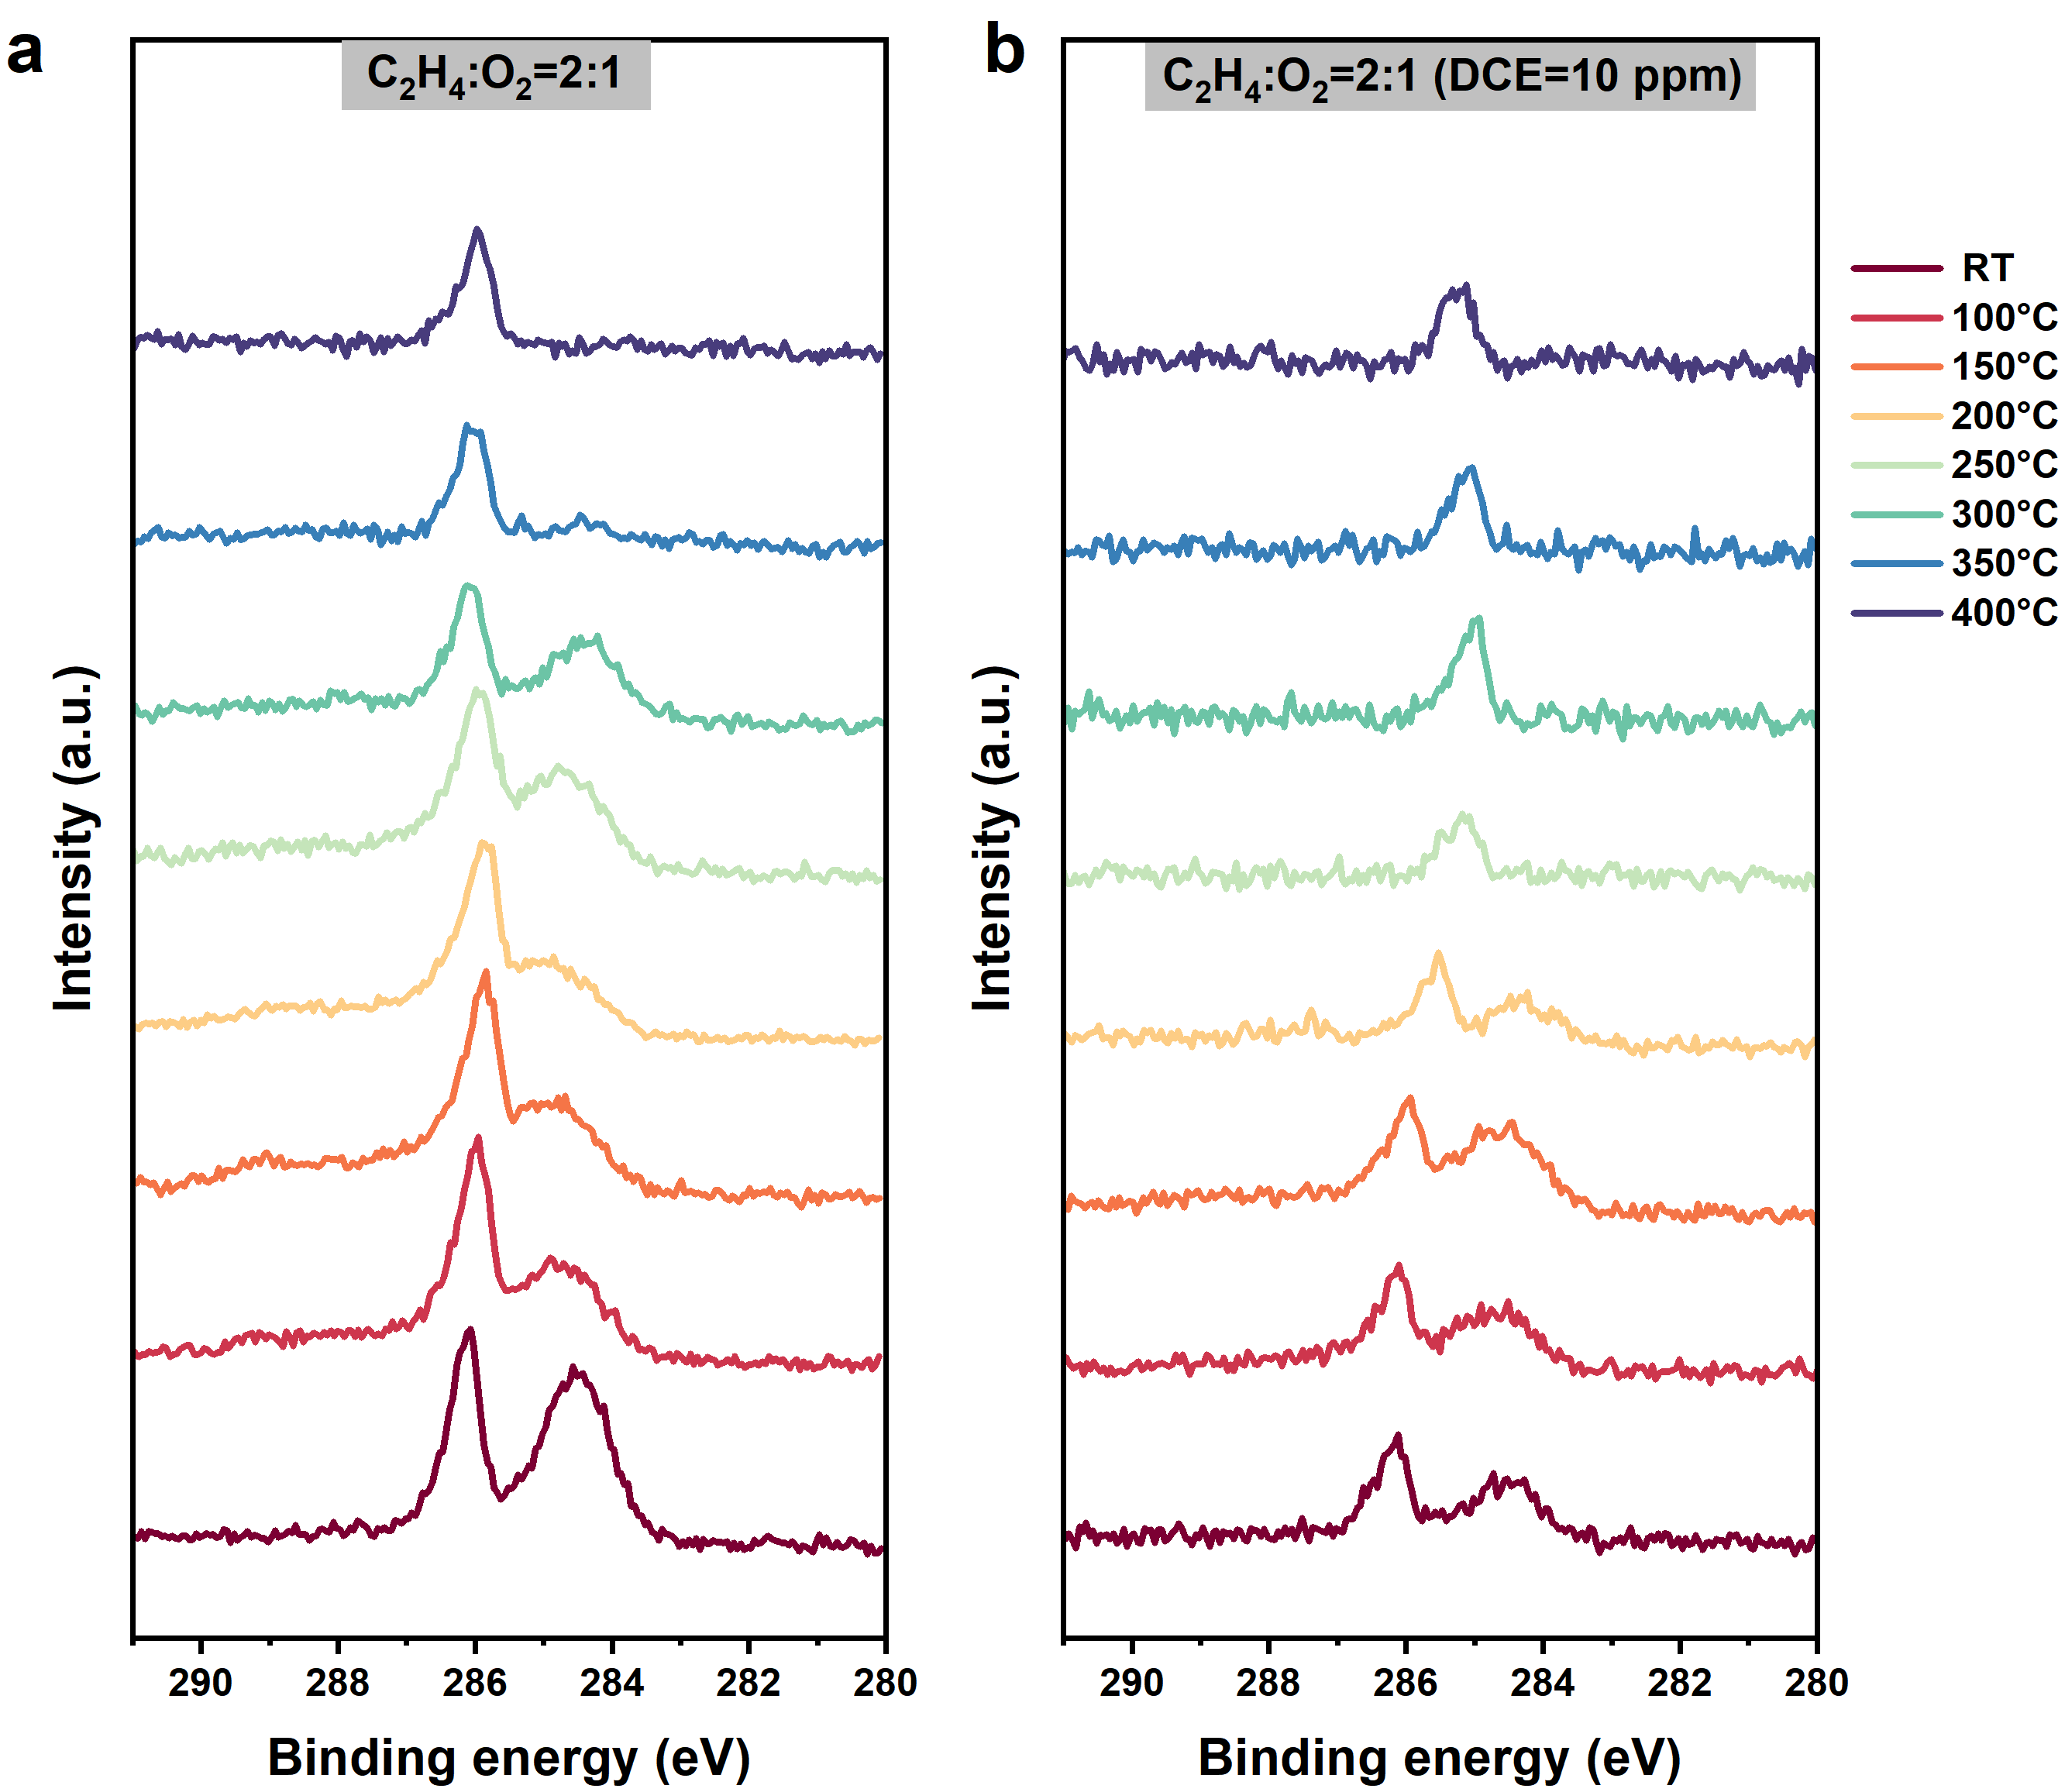


**Supplementary Figure 28.** C 1s spectra of two Ag foil samples collected at different temperatures during exposure to a C2H4:O2 (2:1) gas mixture (1 mbar): **a,** in the absence and **b,** in the presence of 10 ppm dichloroethane (KE=200 eV).


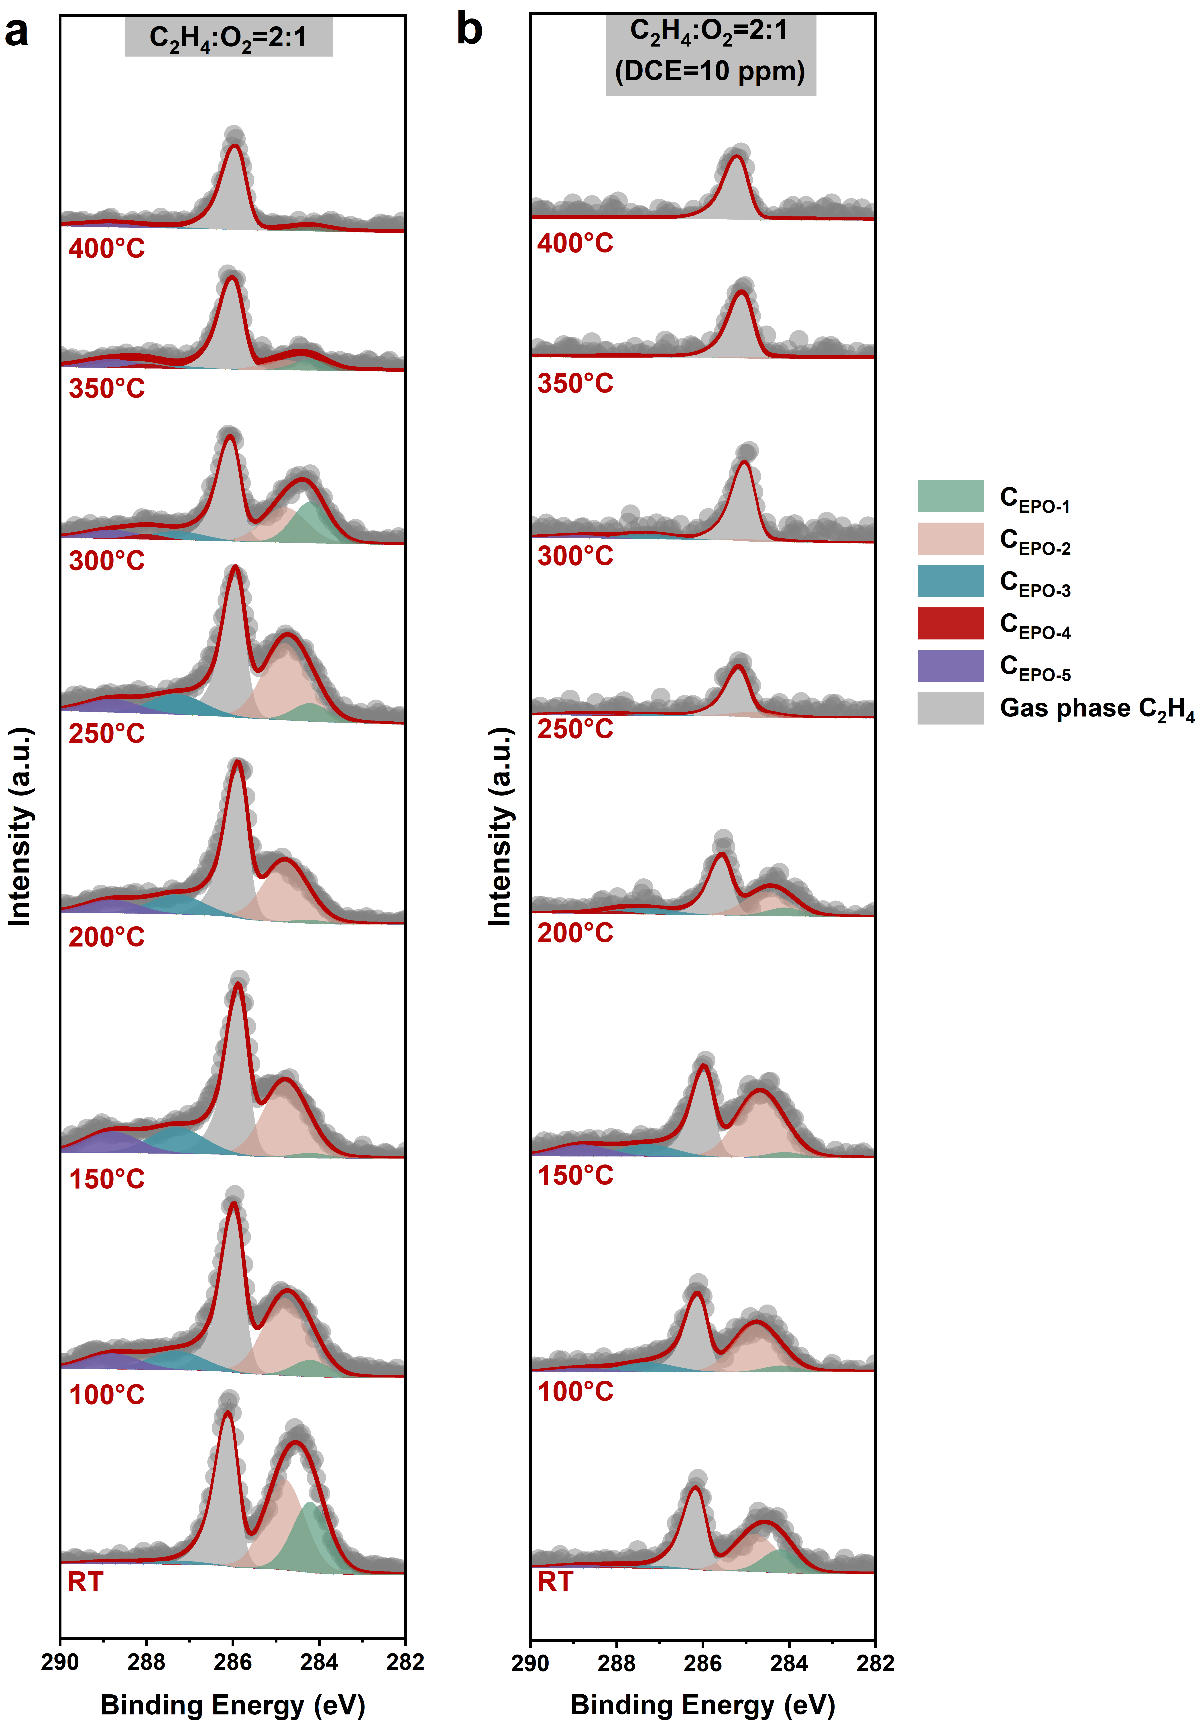


**Supplementary Figure 29.** C 1s peaks evolution of Ag foil at a kinetic energy of 200 eV while exposing the sample to a C2H4:O2 (2:1) mixture at 1 mbar **a,** in the absence and **b,** in the presence of 10 ppm dichloroethane over a temperature range of room temperature to 400 °C. The fitting parameters are listed in Supplementary Table 6.

**Supplementary Table 6. Fitting parameters of C 1s peaks (KE=200 eV).**

|  | BE (eV) | FWHM (eV) | %L-G | Assignment |
| --- | --- | --- | --- | --- |
| CEPO-1 | 284.2 | 1.2 | 10% | C2Hx (x=1-3) |
| CEPO-2 | 284.8 | 1.3 | 10% | Adventitious carbon,  long-chain carbonaceous species, weakly adsorbed ethylene |
| CEPO-3 | 287.3 | 1.5 | 10% | Adsorbed CO |
| CEPO-4 | 288.0 | 1.1 | 10% | Adsorbed EO |
| CEPO-5 | 288.8 | 1.5 | 10% | Carbonate |
| Gas phase C2H4 | 285.1-286.1 | 1.0 | 10% | —— |


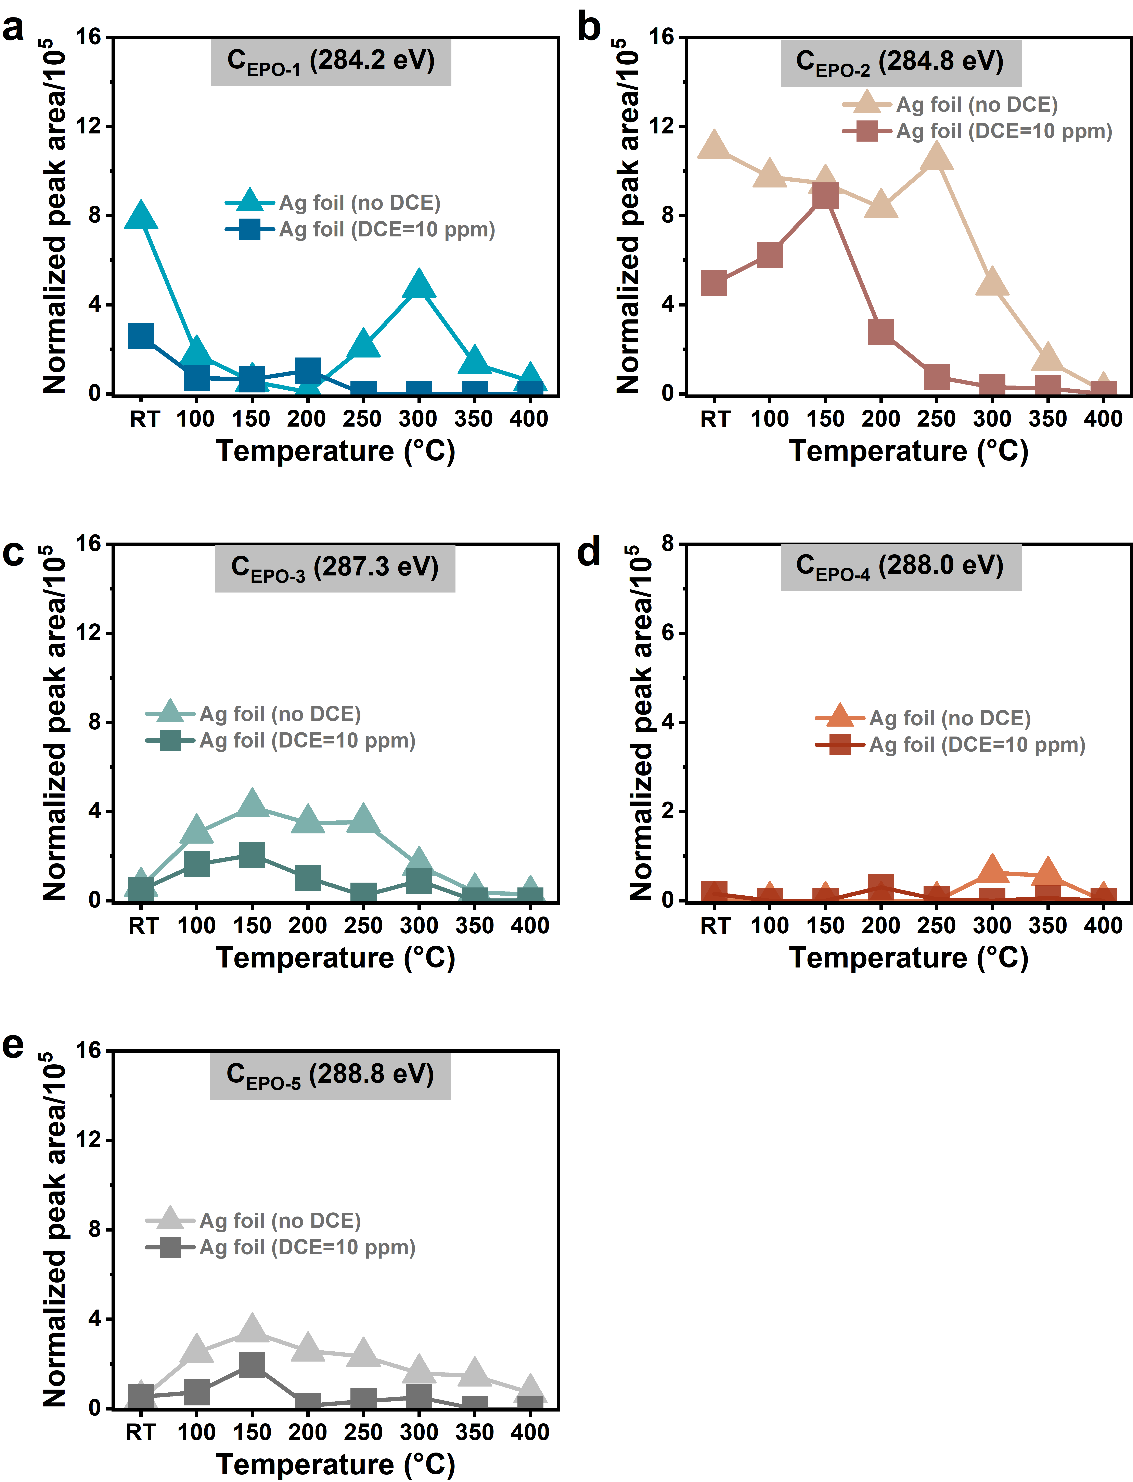


**Supplementary Figure 30.** Normalized peak area of different C-related reaction intermediates on Ag foil as a function of temperature under in situ EPO conditions. (C2H4:O2=2:1, 1 mbar, KE = 200 eV).


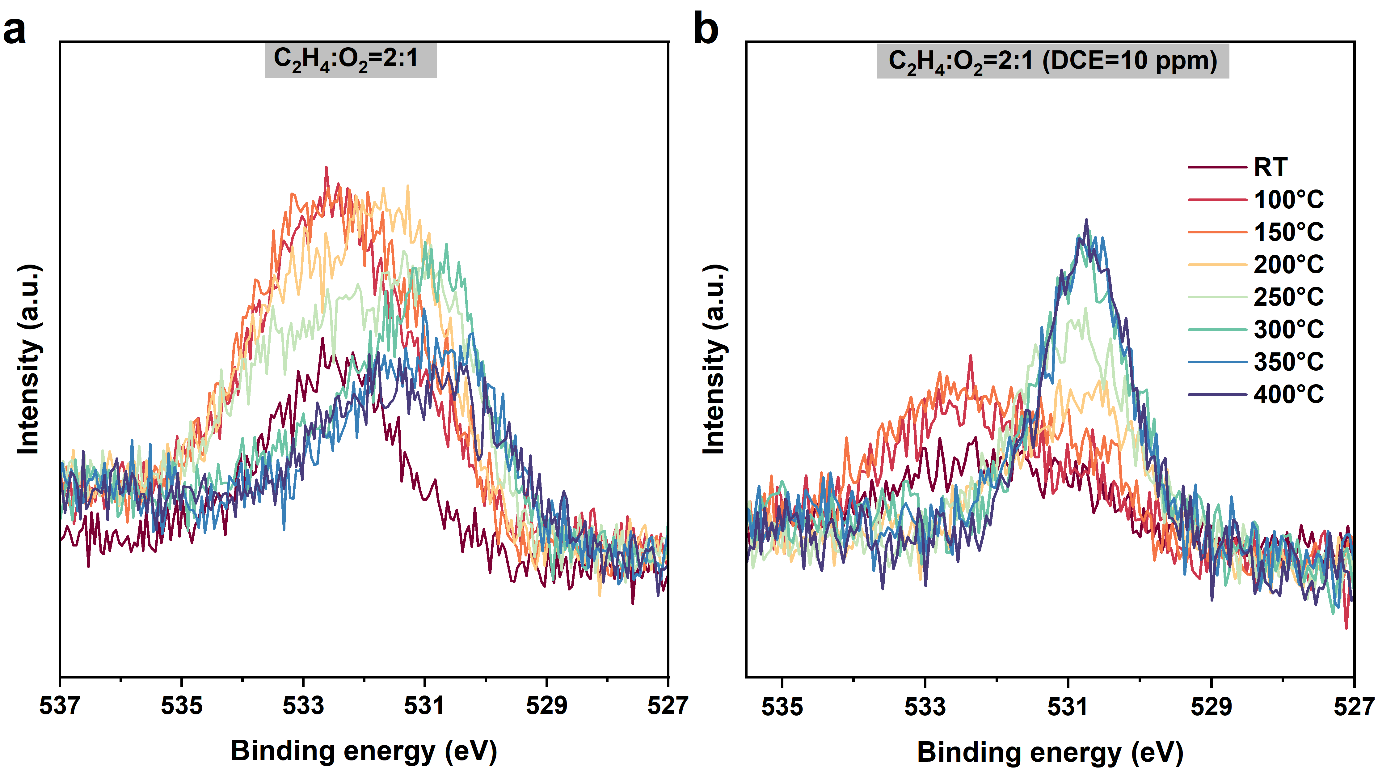


**Supplementary Figure 31.** O 1s spectra of two Ag foil samples acquired at different temperatures during exposure to a C2H4:O2 (2:1) gas mixture (1 mbar): **a,** in the absence and **b,** in the presence of 10 ppm dichloroethane (KE=200 eV).


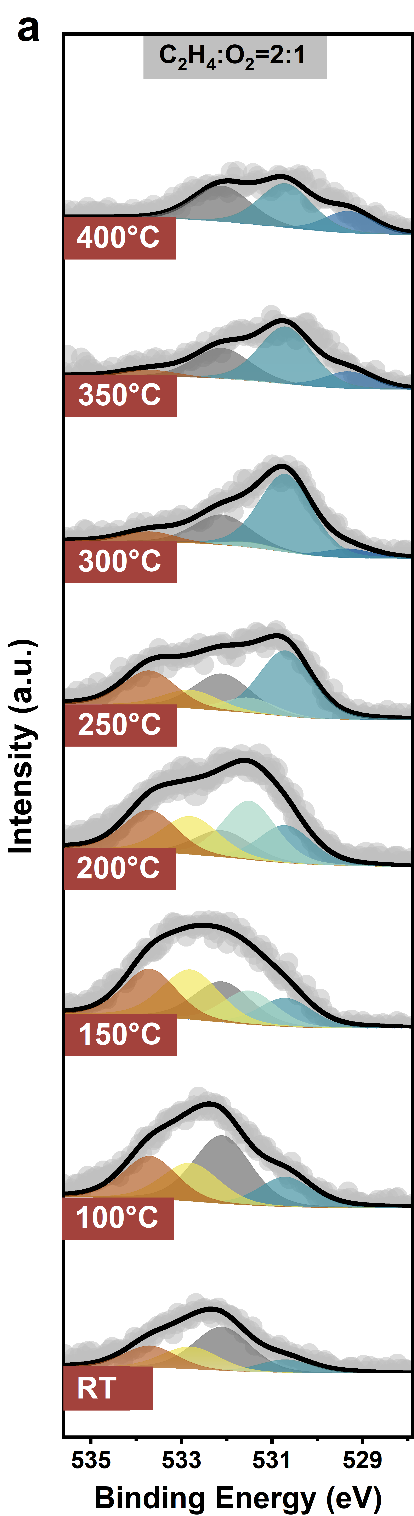

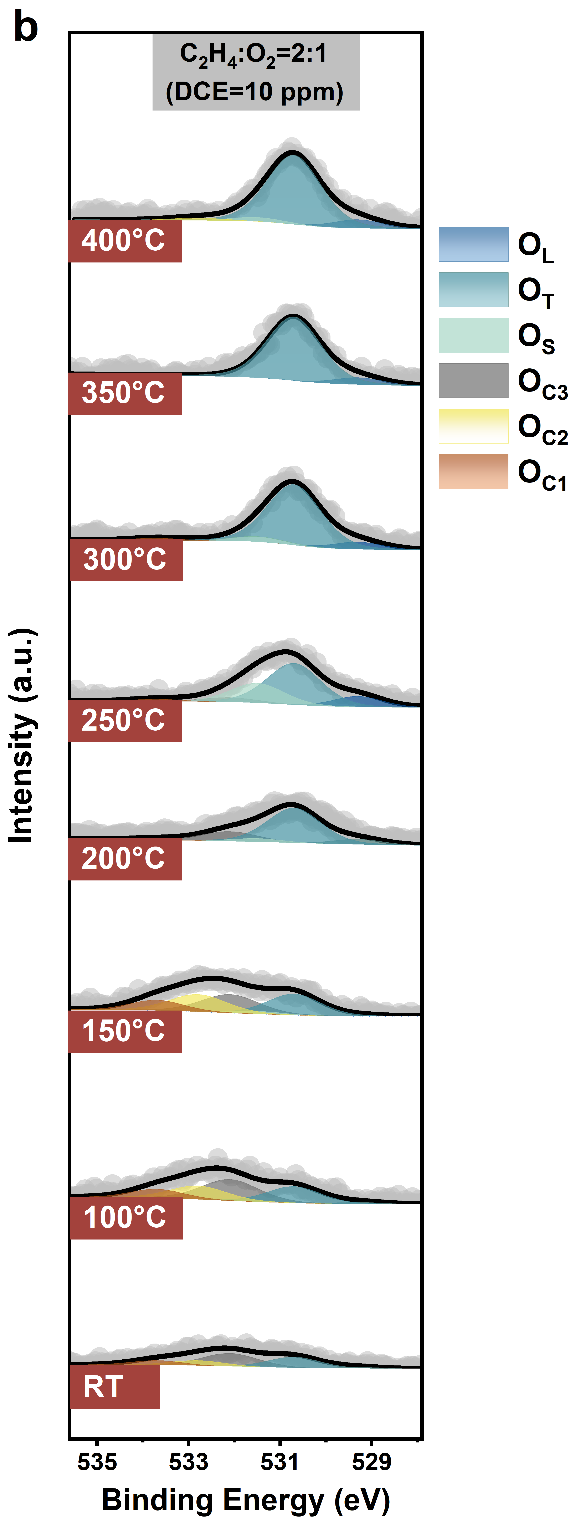


**Supplementary Figure 32.** O 1s peaks evolution of Ag foil at a kinetic energy of 200 eV while exposing the sample to a C2H4:O2 (2:1) mixture at 1 mbar **a,** in the absence and **b,** in the presence of 10 ppm dichloroethane over a temperature range of room temperature to 400 °C. The fitting parameters are listed in Supplementary Table 7.

**Supplementary Table 7. Fitting parameters of O 1s peaks (KE=200 eV).**

|  | BE (eV) | FWHM (eV) | %L-G | Assignment |
| --- | --- | --- | --- | --- |
| OC1 | 533.7 | 1.4 | 25% | Adsorbed H2O |
| OC2 | 532.8 | 1.5 | 25% | Carbonate species |
| OC3 | 532.1 | 1.5 | 25% | Hydroxyl species |
| OS | 531.5 | 1.4 | 25% | Subsurface oxygen in dioxygen species formed on reconstructed surface |
| OT | 530.7 | 1.4 | 25% | Top oxygen in dioxygen species formed on  reconstructed surface |
| OL | 529.3 | 1.3 | 25% | Lattice oxygen on reconstructed Ag surface |


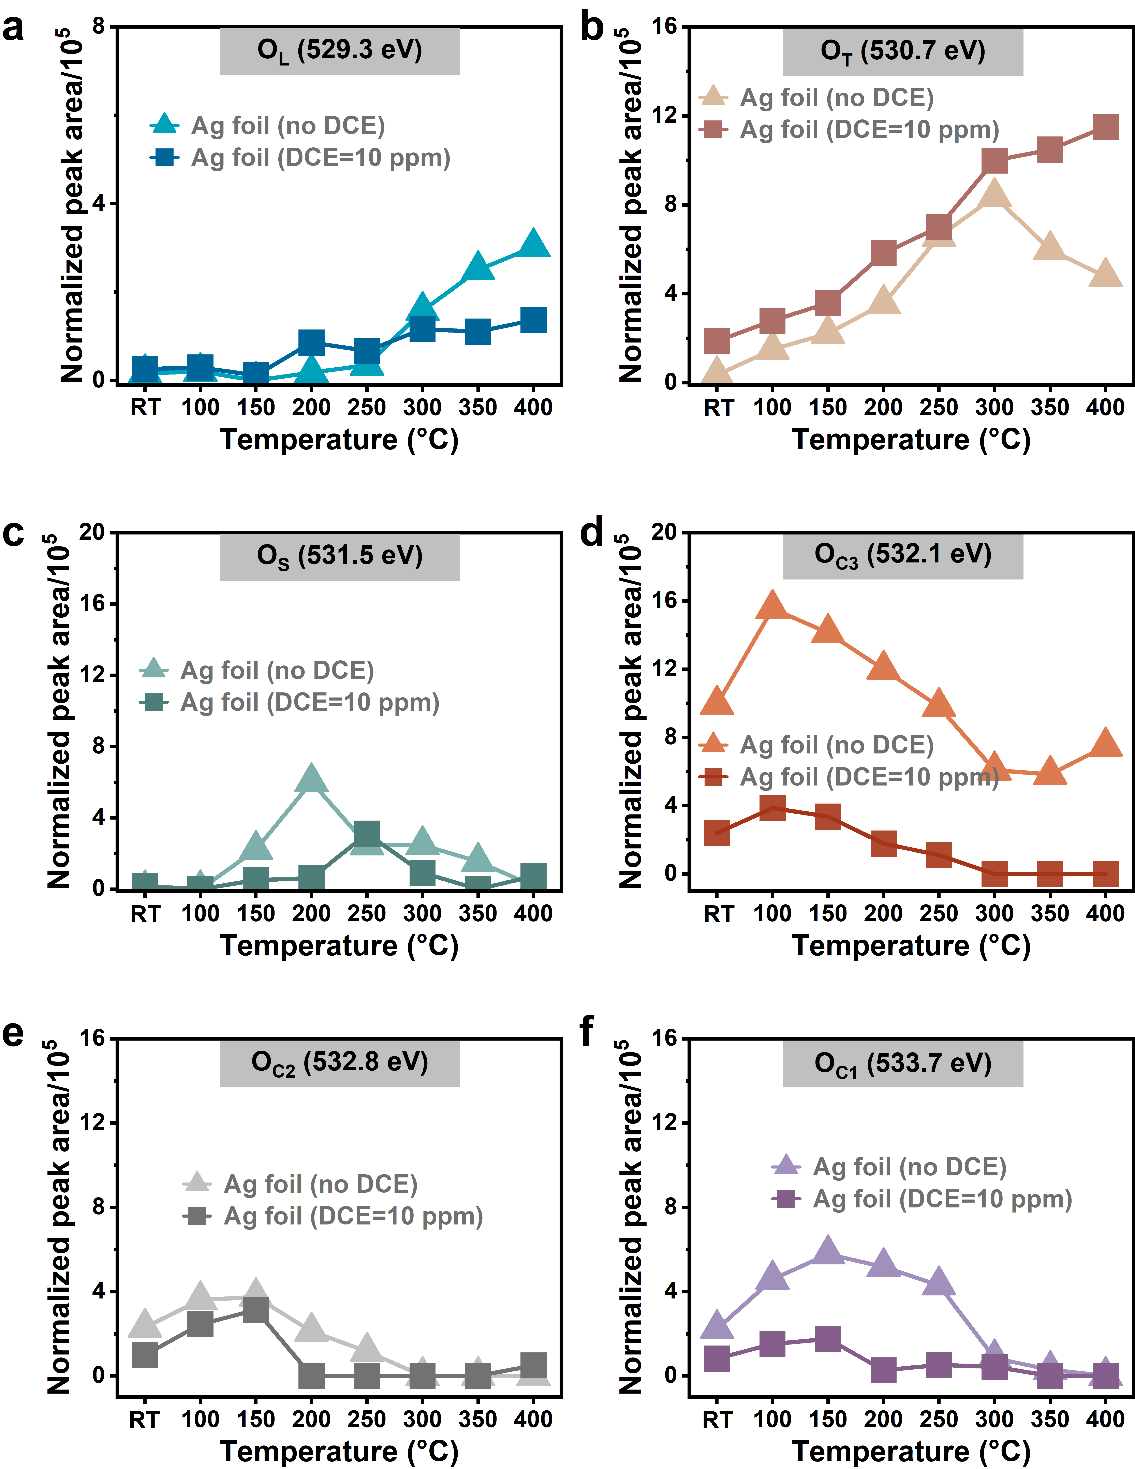


**Supplementary Figure 33.** Normalized peak area of different O species on Ag foil as a function of temperature under in situ EPO conditions. (C2H4:O2=2:1, 1 mbar, KE = 200 eV).


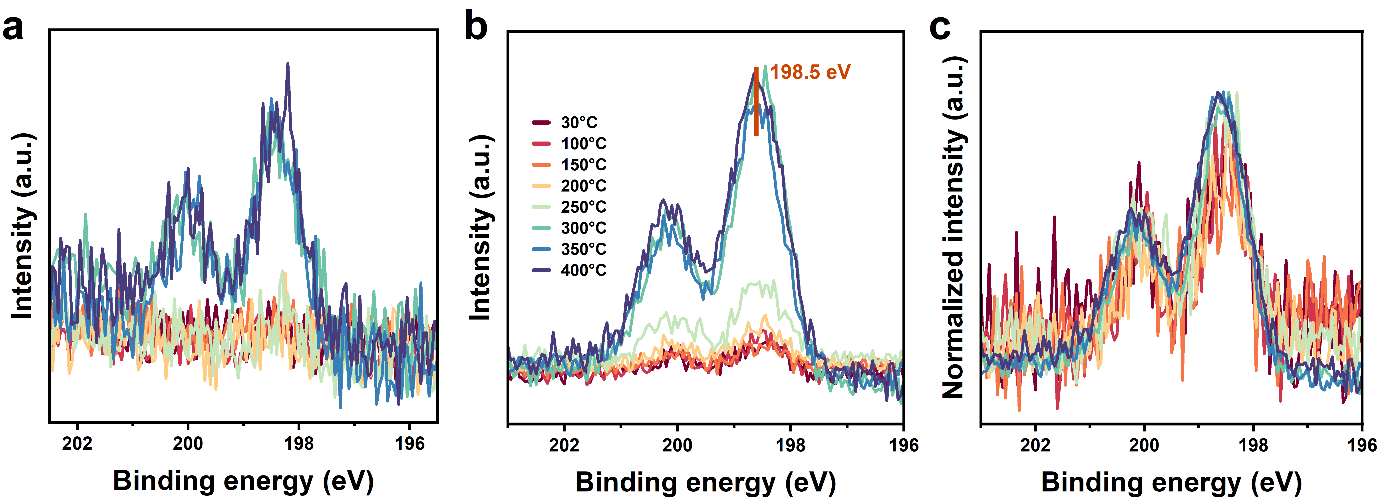


**Supplementary Figure 34.** Cl 2p spectra of Ag foil acquired at a kinetic energy of **a,** 200 eV and **b,** 480 eV while exposing the sample with 10 ppm dichloroethane. **c,** Normalized Cl 2p spectra on Ag foil acquired at a kinetic energy of 480 eV (C2H4:O2=2:1, 1 mbar).


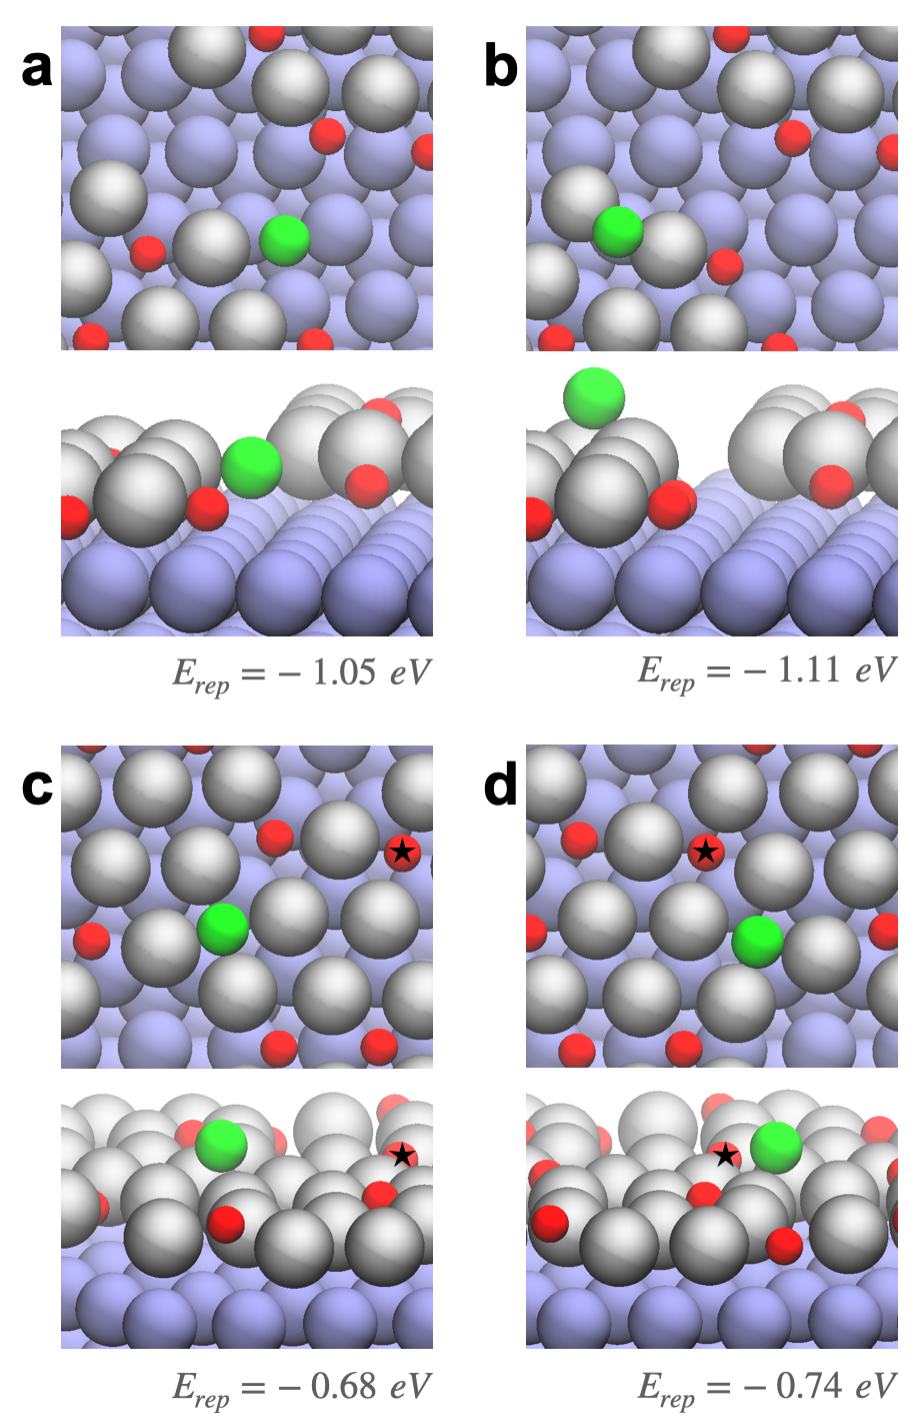


**Supplementary Figure 35.** DFT calculated energy for the replacement of lattice O by atomic Cl on different sites with respect to the O2 and Cl2 in gas phase. a and b show the replacement occurring at p(4×4)-edge sites, while c and d depict replacement on the p(4×4) reconstructed surface. The replacement energy is calculated as: , where Esub–Cl and Esub–O represent the total energies of the surface with Cl and O, respectively.


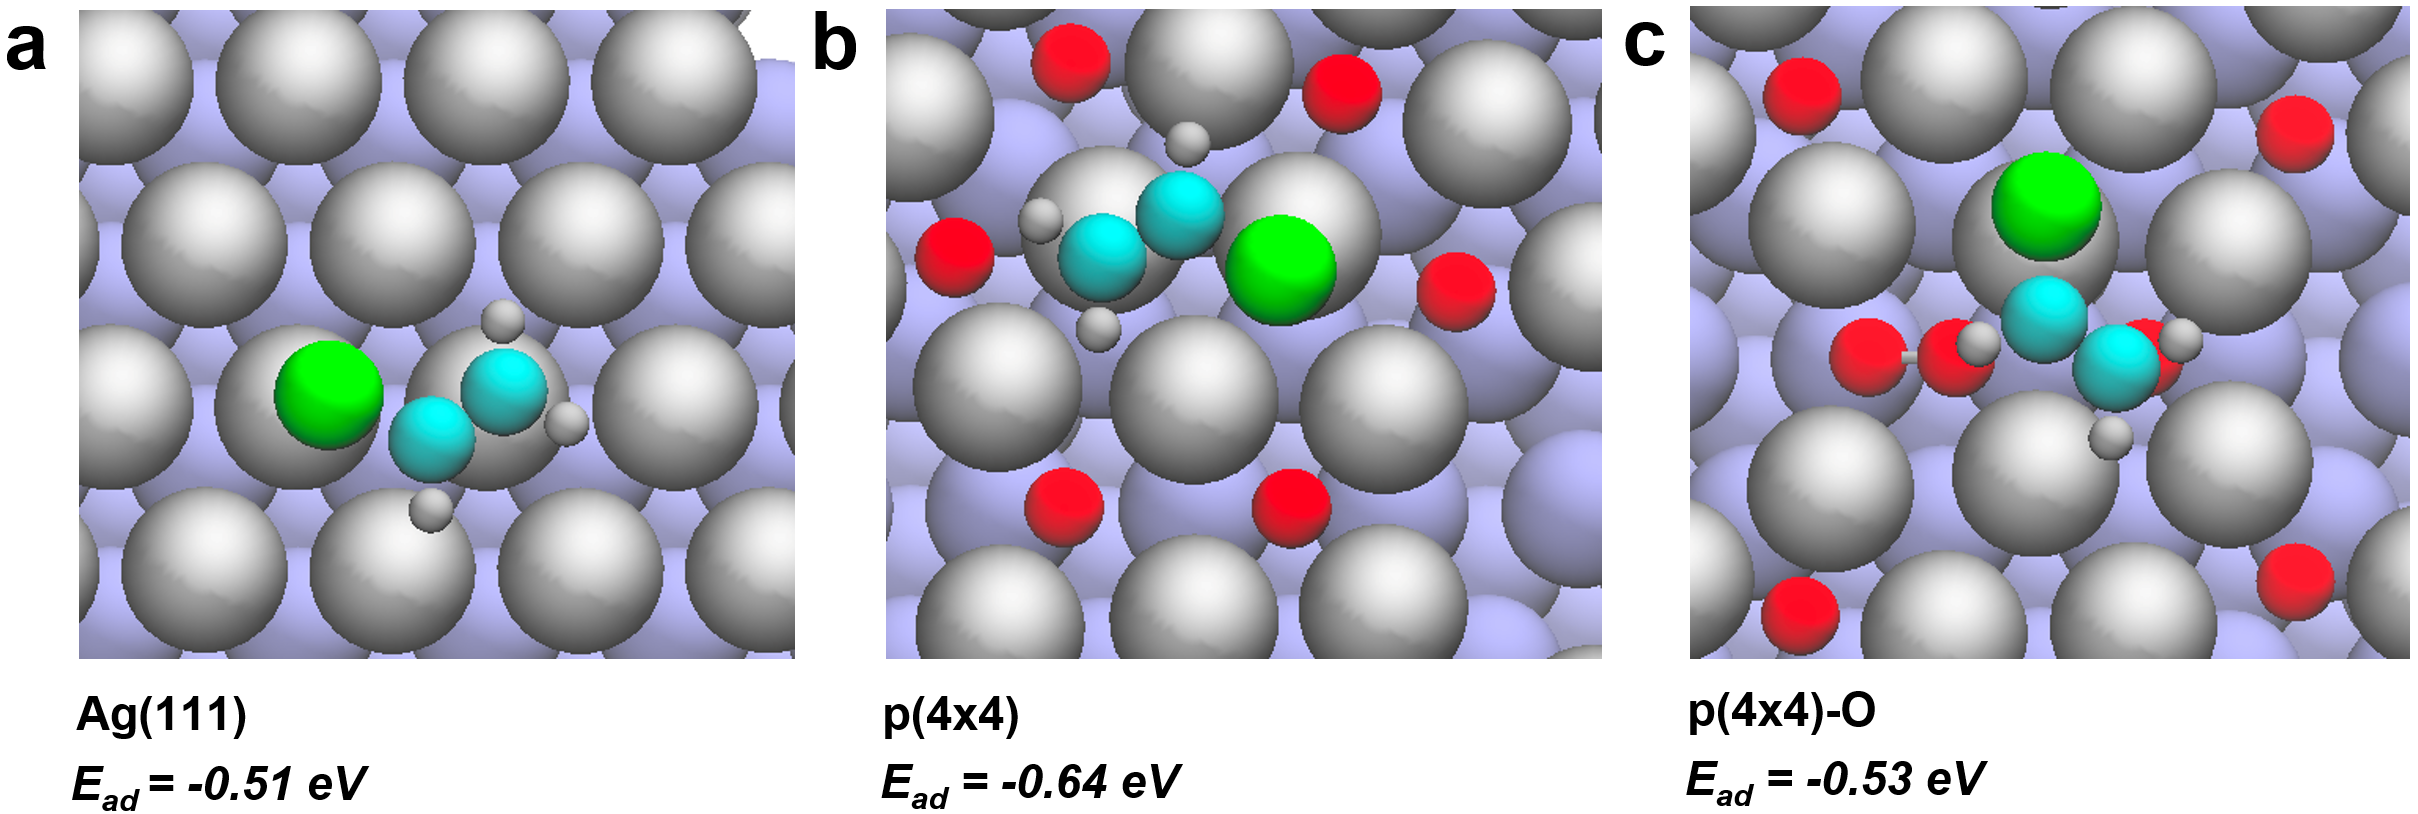


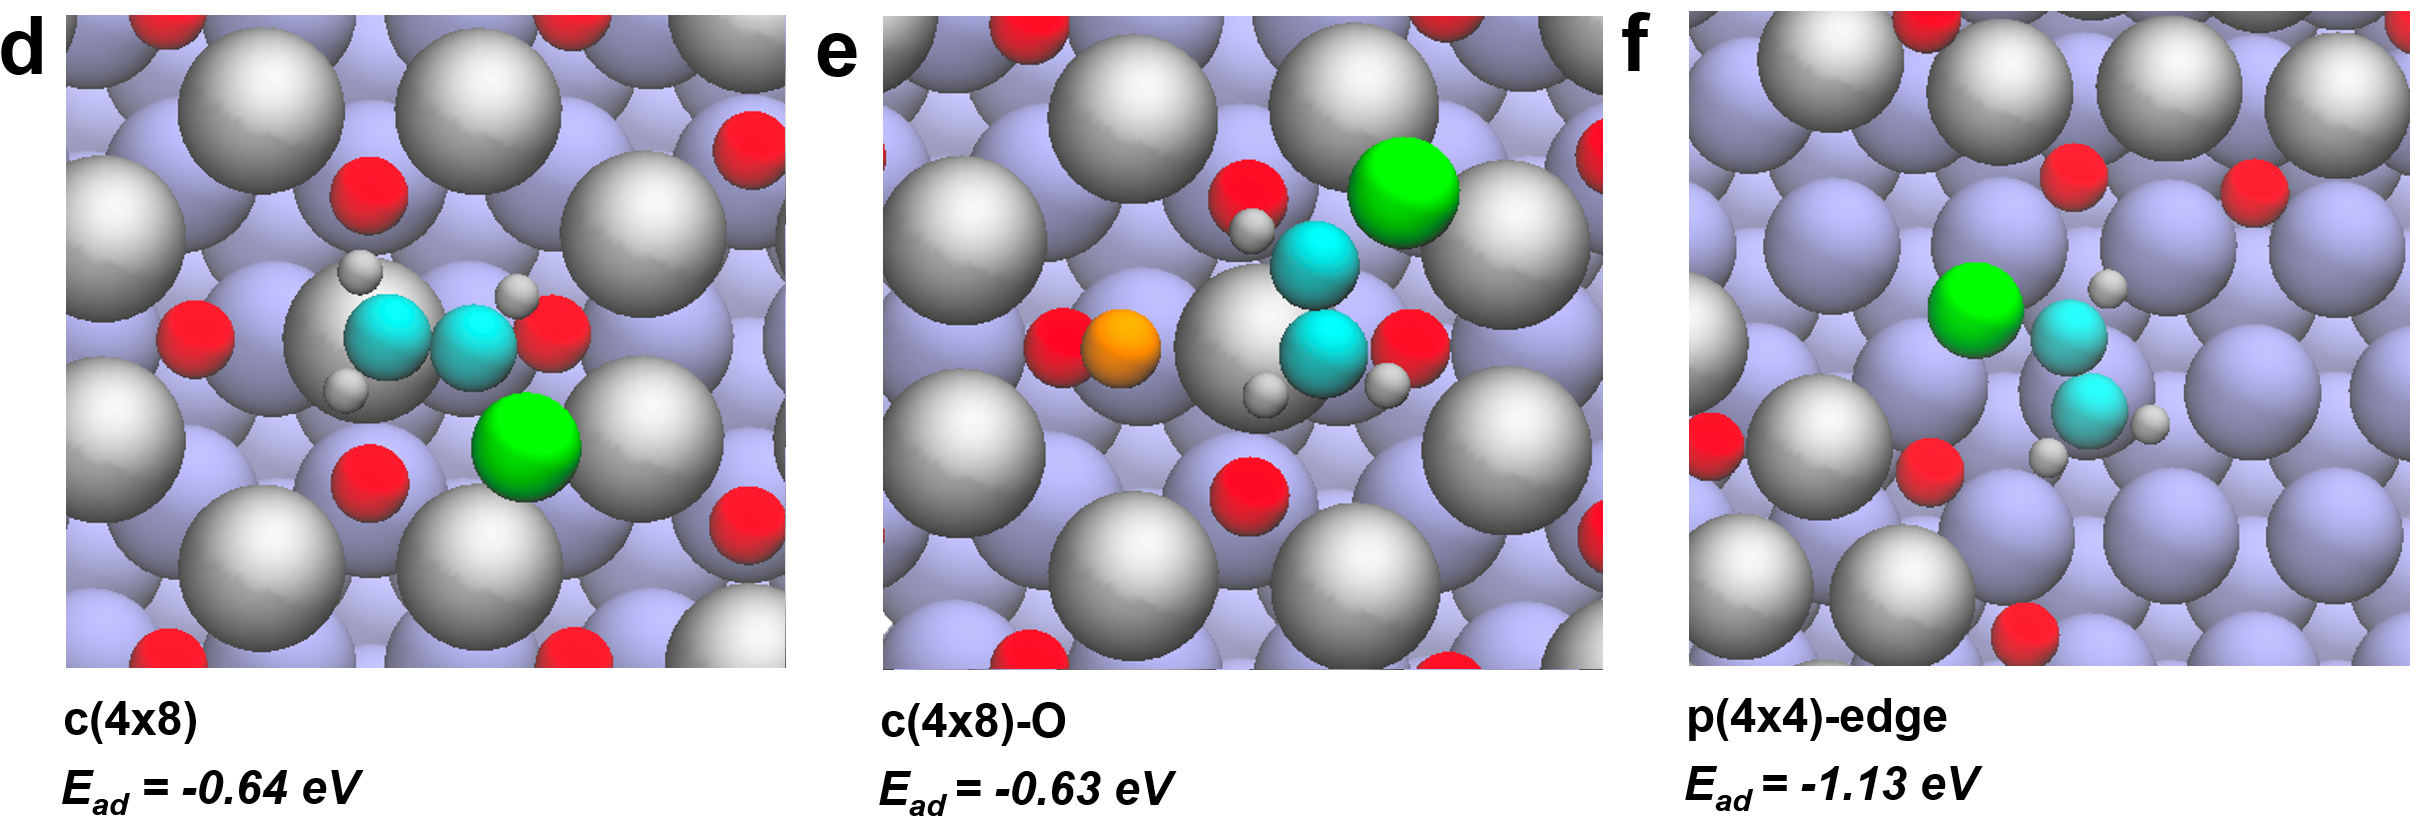


**Supplementary Figure 36.** Optimized configurations of VC on various Ag surfaces. The color code follows that of Supplementary Fig. 19, with dioxygen and chlorine marked in orange and green, respectively.


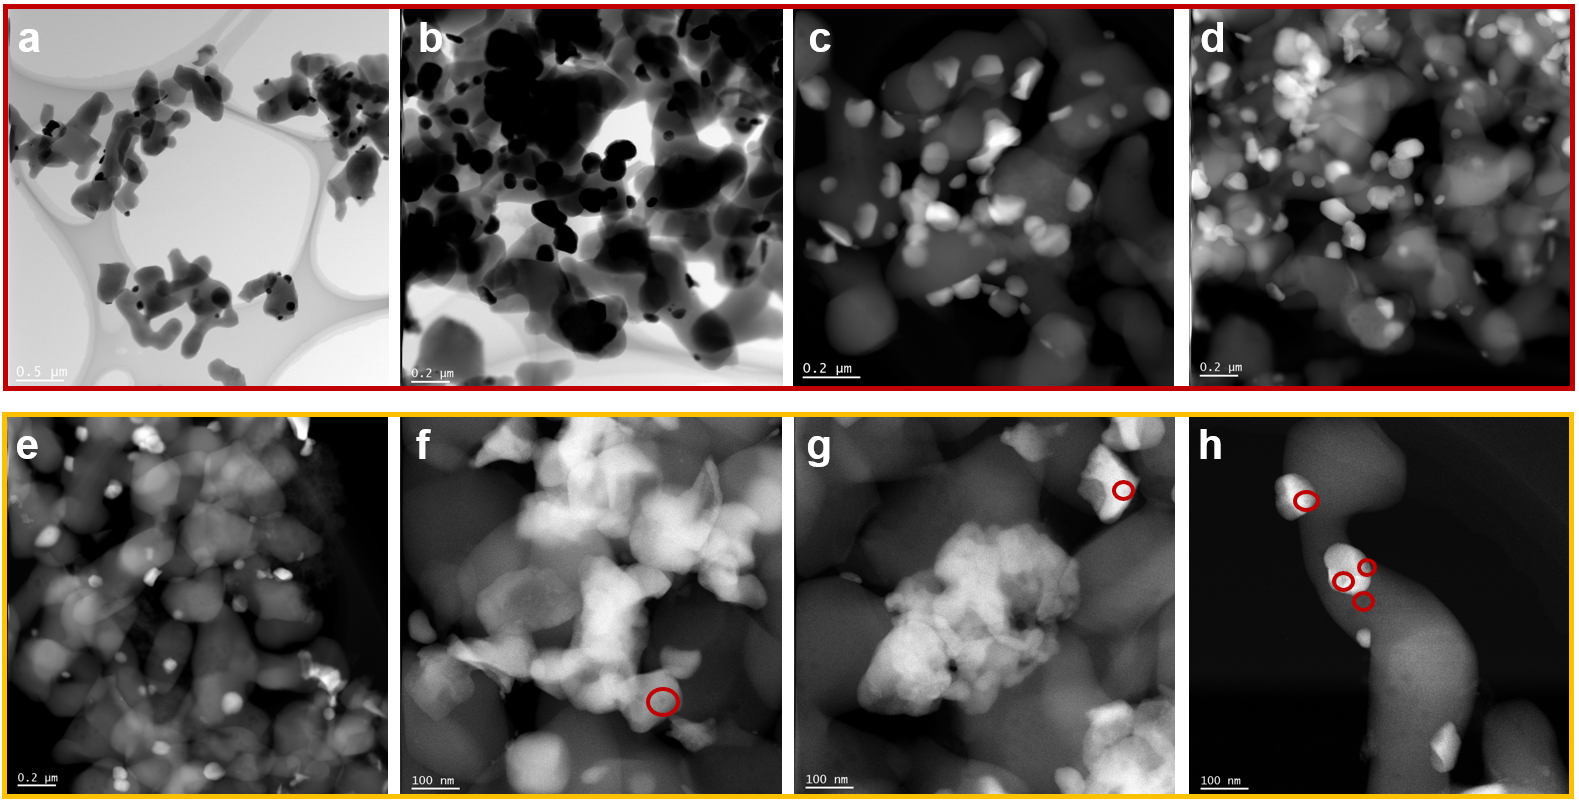


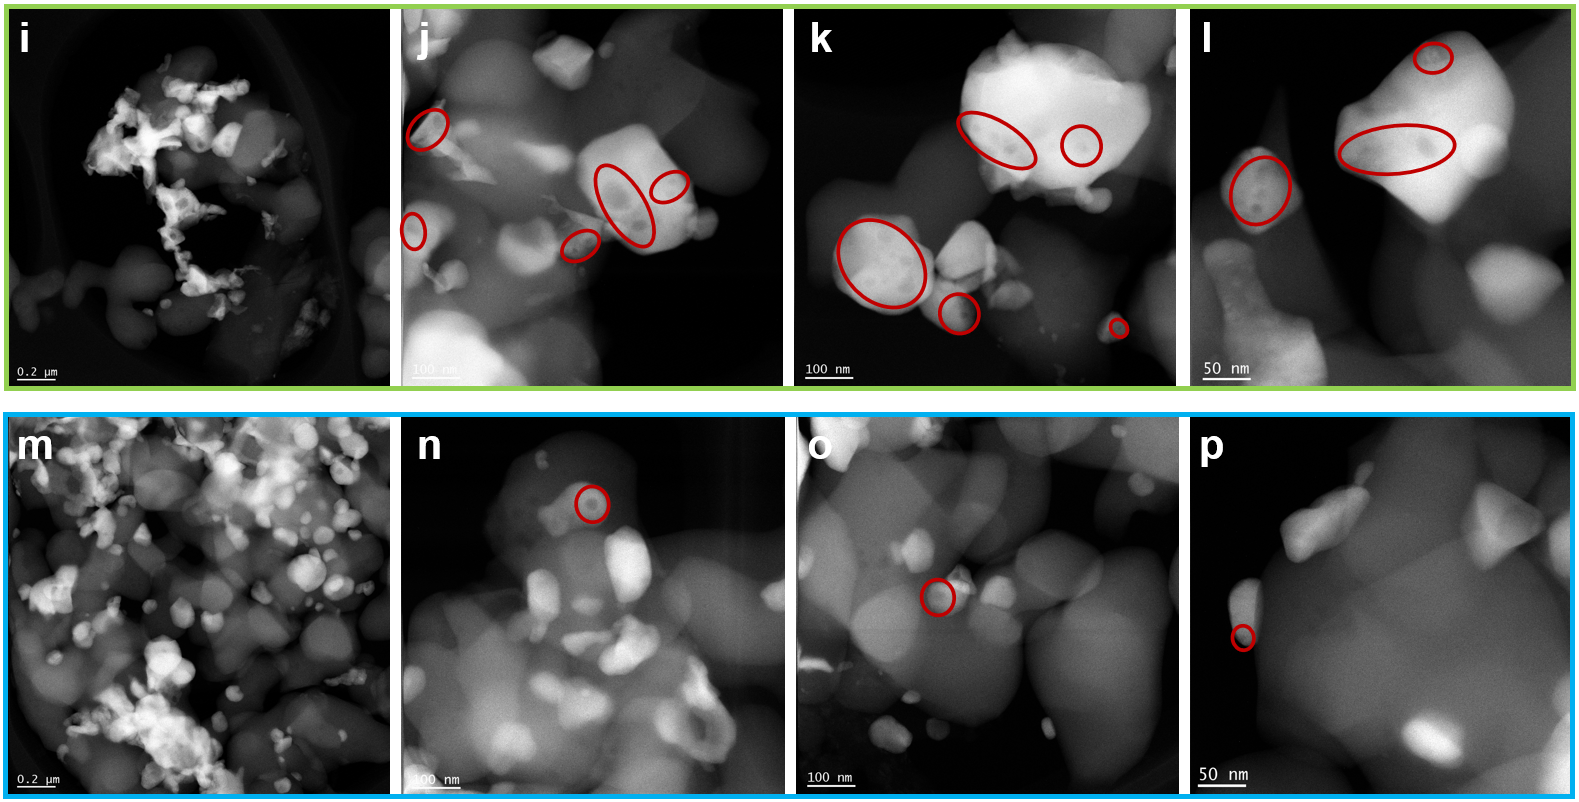


**Supplementary Figure 37.** TEM images of Ag/Al2O3: **a,** fresh catalyst; **b,** spent catalyst after 3 h reaction at 200 °C with 0.5 ppm vinyl chloride; **c,** spent catalyst after 3 h at 230 °C without 0.5 ppm vinyl chloride; **d,** spent catalyst after 3 h at 230 °C with 0.5 ppm vinyl chloride. (Reaction conditions: 15% C2H4, 3% O2 balanced by N2, space velocity = 10000 ml·min-1·g-1). Some of the voids in the Ag particles are marked by red circles.


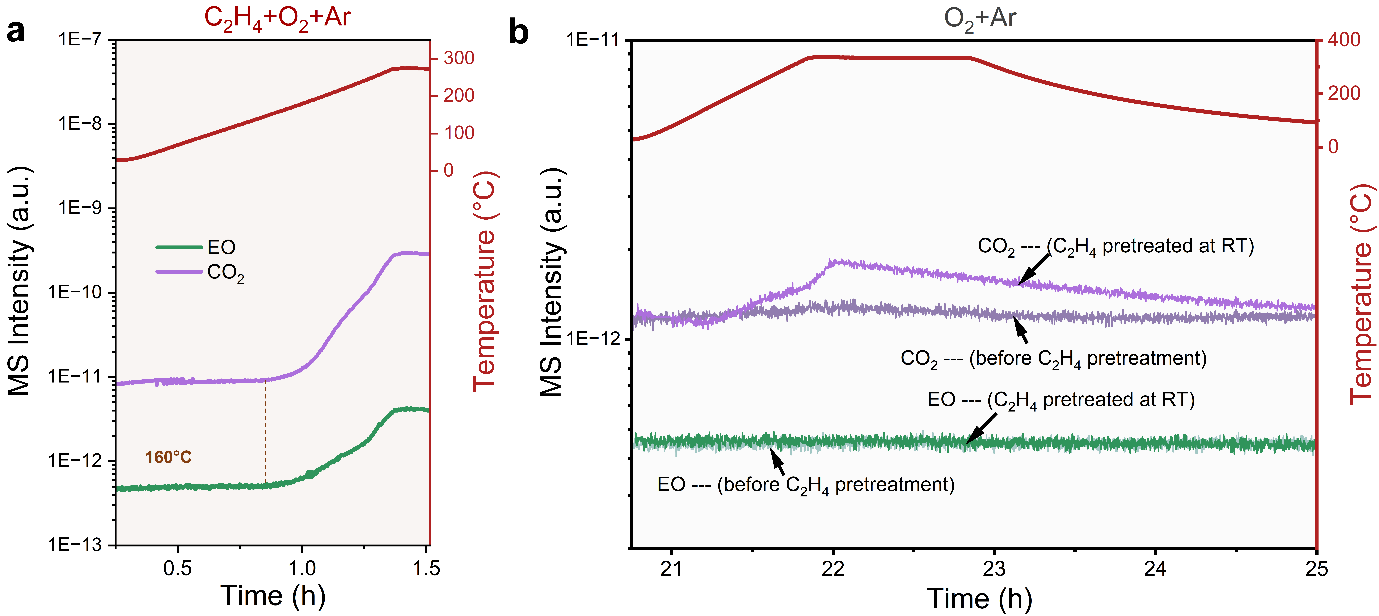


**Supplementary Figure 38. a,** TPSR profiles of Ag/Al2O3 during co-feeding of 5.0 % C2H4 and 7.5% O2 in Ar. **b,** TPSR profiles of Ag/Al2O3 under 7.5% O2 balanced in Ar conditions following a pretreatment with 5% C2H4/7.5% O2 in Ar at room temperature. (Space velocity = 6000 ml·min-1·g-1)

To further confirm the existence of distinct mechanisms, temperature-programmed surface reaction (TPSR) experiments were conducted on the Ag/Al2O3 catalyst, as shown in Supplementary Fig. 38. In a preliminary experiment, the temperature of the catalytic bed was gradually increased from room temperature while feeding an EPO reaction mixture (5% C2H4 + 7.5% O2 in Ar). Both carbon dioxide and EO were detected starting around 160 °C. In a subsequent experiment, the Ag/Al2O3 catalyst was first exposed to 7.5% oxygen in argon at room temperature, then heated to 400 °C and held until neither carbon dioxide nor water were detected, confirming a surface free of reactive carbon species. After cooling to room temperature, 5% ethylene was introduced for 10 minutes, followed by purging with 7.5% oxygen in argon until the ethylene signal completely disappeared. Upon gradually increasing the temperature, carbon dioxide formation was observed above 150 °C, while no EO was detected throughout the entire process. These results indicate that ethylene was preferentially activated (dehydrogenation and C-C bond cleavage, as shown in Fig. 2) to form carbon dioxide precursors at room temperature, and that EO and carbon dioxide are not generated from a common intermediate.

**Supplementary References**

1. Guo M, Dongfang N, Iannuzzi M, van Bokhoven JA, Artiglia L. Structure and Reactivity of Active Oxygen Species on Silver Surfaces for Ethylene Epoxidation. *ACS Catal* 2024, **14:** 10234-10244.
